# Supplementary material for: Application of phosphorus-bridged rigid, bent bis(NHCs) as dipodal ligands in main group and transition metal chemistry
Source: Royal Society of Chemistry journal article supplement (doi:10.1039/d4dt00378k), 2024-01-01
Supplement: d4dt00378k1.pdf [file d4dt00378k1.pdf]

## Supplementary Information

### **Application of phosphorus-bridged rigid bent bis(NHCs) as dipodal ligands in main group and transition metal chemistry**

Tatjana Terschüren,<sup>a</sup> Gregor Schnakenburg<sup>a</sup> and Rainer Streubel<sup>\*a</sup>

<sup>a</sup>Prof. Dr. Rainer Streubel, M. Sc. Tatjana Terschüren, Dr. Gregor Schnakenburg, Institute of Inorganic Chemistry, Rheinische Friedrich-Wilhelms-Universität Bonn, Gerhard-Domagk-Straße 1, 53121 Bonn, Germany., Email: r.streubel@uni-bonn.de.

## Table of contents

|                                                                                            |           |
|--------------------------------------------------------------------------------------------|-----------|
| <b>1. General methods .....</b>                                                            | <b>4</b>  |
| <b>2. Experimental procedures and characterisation.....</b>                                | <b>6</b>  |
| 2.1. 1,4-Diphosphabarrelene 2a.....                                                        | 6         |
| 2.2. 1,4-Diphosphabarrelene 2b .....                                                       | 6         |
| 2.3. Se-methylated imidazolium salt 3a .....                                               | 7         |
| 2.4. Se-methylated imidazolium salt 3b.....                                                | 7         |
| 2.5. Imidazolium salt 4a .....                                                             | 7         |
| 2.6. Imidazolium salt 4b .....                                                             | 8         |
| 2.7. Bis(NHC) 5a .....                                                                     | 9         |
| 2.8. Bis(NHC) 5b .....                                                                     | 9         |
| 2.9. BCl <sub>3</sub> -Bis(NHC) adduct 6a.....                                             | 9         |
| 2.10. CS <sub>2</sub> -Bis(NHC) adduct 7a .....                                            | 10        |
| 2.11. PPh <sub>2</sub> -Bis(NHC) adduct 8a.....                                            | 10        |
| 2.12. Fe(CO) <sub>4</sub> -Bis(NHC) complex 9a.....                                        | 11        |
| 2.13. Attempted synthesis of tri-/tetranuclear Fe(CO) <sub>4</sub> -Bis(NHC) complex ..... | 11        |
| 2.14. Bis(NHC) 5c via trapping reaction of 11.....                                         | 11        |
| 2.15. Fe(CO) <sub>4</sub> -Bis(NHC) complex 9c via trapping reaction of 12 .....           | 12        |
| <b>3. NMR and UV/vis spectra.....</b>                                                      | <b>13</b> |
| 3.1. 1,4-Diphosphabarrelene 2a.....                                                        | 13        |
| 3.2. 1,4-Diphosphabarrelene 2b .....                                                       | 15        |
| 3.3. Se-methylated imidazolium salt 3a .....                                               | 16        |
| 3.4. Se-methylated imidazolium salt 3b.....                                                | 17        |
| 3.5. Imidazolium salt 4a .....                                                             | 19        |
| 3.6. Imidazolium salt 4b .....                                                             | 20        |
| 3.7. Bis(NHC) 5a .....                                                                     | 22        |
| 3.8. Bis(NHC) 5b .....                                                                     | 23        |
| 3.9. BCl <sub>3</sub> -Bis(NHC) adduct 6a.....                                             | 25        |
| 3.10. CS <sub>2</sub> -Bis(NHC) adduct 7a .....                                            | 26        |
| 3.11. PPh <sub>2</sub> -Bis(NHC) adduct 8a.....                                            | 28        |
| 3.12. Fe(CO) <sub>4</sub> Bis(NHC) complex 9a .....                                        | 30        |
| 3.13. Attempted synthesis of tri-/tetranuclear Fe(CO) <sub>4</sub> -Bis(NHC) complex ..... | 31        |
| 3.14. Temperature dependent equilibrium between 1 and 2b .....                             | 32        |
| 3.15. Bis(NHC) 5c .....                                                                    | 32        |
| 3.16. Fe(CO) <sub>4</sub> Bis(NHC) complex 9c .....                                        | 33        |
| 3.17. Retro-[4+2] cycloaddition of 5a.....                                                 | 33        |

|           |                                                                     |           |
|-----------|---------------------------------------------------------------------|-----------|
| <b>4.</b> | <b>Single crystal X-ray diffraction studies .....</b>               | <b>35</b> |
| 4.1.      | 1,4-Diphosphabarrelene 2a .....                                     | 35        |
| 4.2.      | Bis(NHC) 5a .....                                                   | 36        |
| 4.3.      | BCl <sub>3</sub> -Bis(NHC) adduct 6a .....                          | 38        |
| 4.4.      | Fe(CO) <sub>4</sub> -Bis(NHC) complex 9a .....                      | 38        |
| <b>5.</b> | <b>Computational details .....</b>                                  | <b>39</b> |
| 5.1.      | 1,4-Diphosphinine Me-1 .....                                        | 39        |
| 5.2.      | 1,4-Diphosphabarrelene Me-2a .....                                  | 40        |
| 5.3.      | <i>Trans</i> -3-hexene .....                                        | 41        |
| 5.4.      | Transition state Me-2a-TS .....                                     | 41        |
| 5.5.      | 1,4-Diphosphabarrelene Me-2b .....                                  | 43        |
| 5.6.      | 1-Hexene .....                                                      | 44        |
| 5.7.      | Transition state Me-2b-TS .....                                     | 44        |
| 5.8.      | Se-methylated imidazolium salt [Me-3a] <sup>2+</sup> .....          | 45        |
| 5.9.      | Imidazolium salt [Me-4a] <sup>2+</sup> .....                        | 46        |
| 5.10.     | 1,4-Diphosphinine bis(imidazolium) salt Me-10 .....                 | 47        |
| 5.11.     | Transition state Me-4a-TS .....                                     | 48        |
| 5.12.     | Bis(NHC) Me-5a .....                                                | 49        |
| 5.13.     | 1,4-Diphosphinine bis(NHC) 11 .....                                 | 50        |
| 5.14.     | Transition state Me-5a-TS .....                                     | 51        |
| 5.15.     | BCl <sub>3</sub> -bis(NHC) adduct Me-6a .....                       | 52        |
| 5.16.     | CS <sub>2</sub> -bis(NHC) adduct Me-7a .....                        | 53        |
| 5.17.     | Ph <sub>2</sub> P-bis(NHC) adduct Me-8a .....                       | 54        |
| 5.18.     | Fe(CO) <sub>4</sub> Bis(NHC) complex Me-9a .....                    | 56        |
| 5.19.     | Fe(CO) <sub>4</sub> -1,4-diphosphinine bis(NHC) complex Me-12 ..... | 58        |
| 5.20.     | Transition state Me-9a-TS .....                                     | 59        |
| 5.21.     | Benzene .....                                                       | 60        |
| 5.22.     | FMOs of Me-2a and [Me-4a] <sup>2+</sup> .....                       | 61        |
| 5.23.     | LUMO to HOMO-5 of Me-5a .....                                       | 61        |
| 5.24.     | FMOs of Me-9a .....                                                 | 62        |
| 5.25.     | HOMO and LUMO of Me-10 .....                                        | 62        |
| 5.26.     | FMOs of Me-11 .....                                                 | 63        |
| <b>6.</b> | <b>References .....</b>                                             | <b>64</b> |

## 1. General methods

All reactions were performed under dried and deoxygenated argon atmosphere using Schlenk or glovebox techniques. The used argon (>99.998%) was purified by a system of three columns (deoxygenation by a BTS copper catalyst (BASF PuriStar® R3-15S) at ca. 100 °C, removing moisture with silica gel, phosphorus pentoxide desiccant with indicator (Sicapent®) and calcium chloride). Glassware, spatulae, cannulae as well as filter papers were dried in a compartment dryer at 80 °C for at least one hour. Additionally, the glassware was heated with a heat gun (up to 550 °C) under active vacuum ( $< 5 \cdot 10^{-2}$  mbar) and filled with argon. Sterile syringes were purged with argon three times before use. The solvents were dried by standard procedures by refluxing over proper desiccants under an argon atmosphere (*n*-pentane and toluene over sodium wire ( $\varnothing = 2$  mm); diethyl ether stabilised with 3,5-di-*t*-butyl-4-hydroxytoluene (BHT) and tetrahydrofuran over benzophenone and sodium wire; dichloromethane over calcium hydride) for several days and distilled before use. Alternatively, diethyl ether and toluene were dried using a MBraun SPS-800 solvent purification system. For filtration Schlenk frits or stainless steel cannulae ( $\varnothing = 1$  mm and 2 mm) with Whatman® glass microfiber filters (grade GF/A) were used. After use, devices made of stainless steel were cleaned with deionised water and acetone and glassware by storage in a concentrated solution of potassium hydroxide in isopropanol for at least two days and in diluted hydrochloric acid for at least four hours. Afterwards, the glassware was washed with water and soap, deionised water and acetone. All joints were greased with OKS 1112 grease or with PTFE paste (Carl Roth). Vacuum was applied by a rotary vane pump (vacuubrand RZ6) enabling pressures  $< 10^{-2}$  mbar.

NMR spectra were recorded on a Bruker Avance I 300 MHz, Bruker Avance I 400 MHz, Bruker Avance I 500 MHz or Bruker Avance III HD Ascend 500 MHz spectrometer at the NMR department of the University of Bonn and subsequently analysed by the program *MestReNova 14.2*. The calibration of the  $^1\text{H}$  and  $^{13}\text{C}$  NMR spectra was done via the solvent residual signals relative to tetramethylsilane ( $< 1\%$  in  $\text{CDCl}_3$ ) ( $\text{C}_6\text{D}_6$ :  $\delta(^1\text{H}) = 7.16$  ppm and  $\delta(^{13}\text{C}) = 128.06$  ppm,  $\text{CD}_2\text{Cl}_2$ :  $\delta(^1\text{H}) = 5.32$  ppm and  $\delta(^{13}\text{C}) = 53.84$  ppm).<sup>1</sup> All lock frequencies were calibrated internally against the  $^1\text{H}$  signals of solutions of tetramethylsilane with a volume fraction of  $\phi \leq 1\%$  in the corresponding deuterated solvent. The deuterated solvents were used without further purification and dried by storing over 3 Å ( $\text{CD}_2\text{Cl}_2$ ) or 4 Å ( $\text{C}_6\text{D}_6$ ) molecular sieves. The chemical shift ( $\delta$ ) is given in parts per million (ppm) and the coupling constant ( $^nJ_{X,Y}$ ) in Hertz (Hz) as absolute values neglecting the sign where *n* is the number of bonds between the coupling nuclei X and Y. For assigning the multiplicity following abbreviations were used: s = singlet, d = doublet, dd = doublet of doublets, m = multiplet, sat = satellites and br = broad. For  $^1\text{H}$  NMR spectra additionally the number of nuclei is given accordingly which is determined via integration. The  $^1\text{H}$  and  $^{13}\text{C}$  NMR signals of compounds were assigned by a combination of COSY, HSQC and HMBC experiments to unequivocally assign protons and carbon resonances if necessary. All measurements were performed at ambient temperature (298 K) if not stated otherwise.

Mass spectrometry using electrospray ionisation (ESI) or atmospheric-pressure chemical ionization (APCI) was performed on a Thermo Fisher Scientific Orbitrap XL mass spectrometer. Only selected data are given for detected ions. The peaks are given in mass-to-charge ratio (*m/z*) while only the isotopomer with the highest relative abundance is represented. Additionally, the relative intensities of the peaks are given in parentheses and the proposed molecule fragments in square brackets if not stated otherwise.

UV/vis spectra were recorded in the spectral range of 200–700 nm on a *Shimadzu UV-1650PC* spectrometer with a double-beam optic photometric system with a maximum wavelength range of 190.0 to 1100 nm, a spectra band width of 2 nm and a wavelength accuracy of  $\pm 0.5$  nm with an automatic wavelength correction. An automatic baseline correction with the pure solvent was performed before the analyte solution was measured. The detector is a silicon photodiode with a photometric range of  $-0.5$  to 3.999 absorbance. Quartz glass cuvettes (*Hellma* precision cells *110-QC*) with dimensions of 46 mm  $\times$  12.5 mm  $\times$  12.5 mm, a light path length of 10 mm and a chamber volume of 350  $\mu$ L were used and closed with PTFE caps before measurement. Measurements were started with a circa  $10^{-5}$  molar solution of the respective compound and diluted until a sufficient spectrum was recorded. All spectra are normed to an absorbance of 1 a.u.; no extinction coefficient were determined. Absorbance wavelengths are given in nanometers (nm) with the relative absorbance (max. 1) and assignment to the associated transition in parentheses.

IR spectra of solids were recorded in the spectral range of 4000-400  $\text{cm}^{-1}$  on a Bruker Alpha FTIR spectrometer with a single-reflection diamond ATR measurement or a Shimadzu IRSpirit FTIR spectrometer with a single-reflection germanium ATR measurement attachment in a glovebox at ambient temperature. All analyses were performed using the programs *EZ OMNIC 7.3* of Fisher Scientific and *OPUS* of Bruker. Only selected wavenumbers of the absorption bands are given using reciprocal centimetres ( $\text{cm}^{-1}$ ). The intensities of the bands are marked as very strong (vs), strong(s), medium (m), weak (w).

Elemental analyses were performed on a Elementar Vario Micro analysis device in quadruplicate or triplicate for each sample. All samples were prepared and weighed up in tin or silver sample containers using a micro-analytical balance in a glovebox. The mean C, H and N values are given for each compound.

Melting points were measured using a MPM-H2 device or a Büchi melting point determination device according to Dr. Tottoli. The samples were grease-sealed in a glass capillary ( $\varnothing = 0.1$  mm) in a glovebox and heated quickly (ca. 10 K/min) for a rough determination of the melting point or decomposition temperature. Afterwards, a heating rate of approximately 1 K/min was used until the sample melted or decomposed. No internal or external temperature corrections were performed.

Single crystal X-ray diffraction analyses were performed on a Bruker D8-Venture diffractometer at 100 K by using monochromated Cu-K $\alpha$  radiation ( $\lambda = 1.54178$  Å) (**2a**, **6b**), a STOE IPDS-2T diffractometer at 123 K by using monochromated Mo-K $\alpha$  radiation ( $\lambda = 0.71073$  Å) (**4a**) or a STOE STADIVARI diffractometer at 100 K by using monochromated Cu-K $\alpha$  radiation ( $\lambda = 1.54178$  Å) (**5a,b**). Intensities were measured by fine-slicing  $\phi$  and  $\omega$  scans and corrected background, polarisation and Lorentz effects. A semi-empirical absorption correction was applied for the data sets following Blessing's method.<sup>2</sup> The structure was solved by direct methods and refined anisotropically by the least-squares procedure implemented in SHELX program system.<sup>3</sup> All non-hydrogen atoms were refined anisotropically. The hydrogen atoms were included isotropically refined using a riding model at the bound carbon atoms. The program *Olex2 1.5 of OlexSys*<sup>4</sup> was used for analyses and the ellipsoid representations of the molecular structures with the probability level set to 50%. Crystallographic data for the structures reported in this paper have been deposited with the Cambridge Crystallographic Data Centre as supplementary publication no. CCDC-2301879 (**2a**) and CCDC- 2301880 (**5a**), which can be obtained free of charge via [www.ccdc.cam.ac.uk/data\\_request/cif](http://www.ccdc.cam.ac.uk/data_request/cif).

## 2. Experimental procedures and characterisation

### 2.1. 1,4-Diphosphabarrelene 2a

To a solution of 2.000 g (3.47 mmol, 1.0 eq.) of **1** in 60 mL dichloromethane 3.00 mL (24.1 mmol, 7.0 eq.) *trans*-3-hexene were added dropwise. After stirring for 7 d at ambient temperature the solution had turned red and the solvent was removed *in vacuo* ( $\leq 0.05$  mbar). The resulting slightly pink residue was washed four times with 20 mL *n*-pentane each (until the washing solution is not pink anymore) and the orange solid was dried for 2 h ( $\leq 0.02$  mbar). Yield: 1.71 g (2.58 mmol, 74 %). Mp: 120 °C (dec.). Elemental analysis: Found: C, 50.2; H, 7.2; N, 8.6. Calc. for C<sub>28</sub>H<sub>48</sub>N<sub>4</sub>P<sub>2</sub>Se<sub>2</sub>: C, 50.9; H, 7.3; N, 8.5 %. **2a** slowly decomposes at room temperature. IR:  $\tilde{\nu}_{max}/\text{cm}^{-1} = 2957\text{m}$  and  $2928\text{m}$  ( $\nu_{as}(\text{CH}_3)$ ,  $\nu_s(\text{CH}_2)$ ),  $2860\text{m}$  ( $\nu_s(\text{CH}_3)$ ,  $\nu_{as}(\text{CH}_2)$ ). <sup>1</sup>H NMR (500.04 MHz, 298.0 K, CD<sub>2</sub>Cl<sub>2</sub>):  $\delta$  / ppm = 0.97 (t, <sup>3</sup>J<sub>H,H</sub> = 7.4 Hz, 12H, CH<sub>3</sub>(*n*-Bu)), 1.10 (t, <sup>3</sup>J<sub>H,H</sub> = 7.2 Hz, 6H, CH<sub>3</sub>(Et)), 1.15–1.27 (m, 2H, PCHCH<sub>2</sub>), 1.31–1.45 (m, 8H, NCH<sub>2</sub>CH<sub>2</sub>CH<sub>2</sub>), 1.46–1.57 (m, 2H, PCHCH<sub>2</sub>), 1.63–1.85 (m, 10H, NCH<sub>2</sub>CH<sub>2</sub>, PCH), 4.15–4.23 (m, 2H, NCH<sub>2</sub>), 4.24–4.34 (m, 6H, NCH<sub>2</sub>). <sup>13</sup>C{<sup>1</sup>H} NMR (125.75 MHz, 298.0 K, CD<sub>2</sub>Cl<sub>2</sub>):  $\delta$  / ppm = 11.4 (s, CH<sub>3</sub>(*n*-Bu)), 13.9 (m, CH<sub>3</sub>(Et)), 20.3 (m, NCH<sub>2</sub>CH<sub>2</sub>CH<sub>2</sub>), 28.3 (m, PCHCH<sub>2</sub>), 32.3 (m, NCH<sub>2</sub>CH<sub>2</sub>), 46.4 (dd, J<sub>P,C</sub> = 5.5 Hz, PCH), 49.0 (m, NCH<sub>2</sub>), 137.1 (dd, J<sub>P,C</sub> = 8.0 Hz, J<sub>P,C</sub> = 5.5 Hz, PC), 139.8 (d, J<sub>P,C</sub> = 4.3 Hz, PC), 159.6 (s<sub>sat</sub>, <sup>1</sup>J<sub>Se,C</sub> = 235.1 Hz, CSe). <sup>31</sup>P NMR (202.44 MHz, 298.0 K, CD<sub>2</sub>Cl<sub>2</sub>):  $\delta$  / ppm = –86.3 (m). <sup>31</sup>P{<sup>1</sup>H} NMR (202.44 MHz, 298.0 K, CD<sub>2</sub>Cl<sub>2</sub>):  $\delta$  / ppm = –86.3 (s). <sup>77</sup>Se NMR (57.24 MHz, 298.0 K, CD<sub>2</sub>Cl<sub>2</sub>):  $\delta$  / ppm = 31.2 (s). MS (positive ESI): *m/z* = 663.176 (<1 %) [M+H]<sup>+</sup>, 583.259 (100) [M–Se+H]<sup>+</sup>, 579.262 (20) [M–hexene]<sup>+</sup>, 499.165 (43) [M–hexene–Se+H]<sup>+</sup>. HR-MS (positive ESI): found: 663.1756. Calc. for [C<sub>28</sub>H<sub>48</sub>N<sub>4</sub>P<sub>2</sub>Se<sub>2</sub>H]<sup>+</sup> 663.1763.

### 2.2. 1,4-Diphosphabarrelene 2b

To a solution of 1.001 g (1.74 mmol, 1.0 eq.) of **1** in 30 mL dichloromethane 0.73 mL (8.68 mmol, 5.0 eq.) 1-hexene were added dropwise. After stirring for 3 d at ambient temperature the solution had turned yellow and the solvent was removed *in vacuo* ( $\leq 0.05$  mbar). The resulting yellow residue was washed twice with 10 mL diethyl ether each and four times with 10–20 mL *n*-pentane each and the beige solid was dried for 2 h ( $\leq 0.02$  mbar). Yield: 0.765 g (1.16 mmol, 67 %). Mp: 142 °C (dec.). Elemental analysis: Found: C, 50.35; H, 7.3; N, 8.6. Calc. for C<sub>28</sub>H<sub>48</sub>N<sub>4</sub>P<sub>2</sub>Se<sub>2</sub>: C, 50.9; H, 7.3; N, 8.5 %. **2b** slowly decomposes at room temperature. IR:  $\tilde{\nu}_{max}/\text{cm}^{-1} = 2956\text{m}$  and  $2927\text{m}$  ( $\nu_{as}(\text{CH}_3)$ ,  $\nu_s(\text{CH}_2)$ ),  $2860\text{m}$  ( $\nu_s(\text{CH}_3)$ ,  $\nu_{as}(\text{CH}_2)$ ). <sup>1</sup>H NMR (500.04 MHz, 298.0 K, CD<sub>2</sub>Cl<sub>2</sub>):  $\delta$  / ppm = 0.89 (t, <sup>3</sup>J<sub>H,H</sub> = 7.3 Hz, 3H, CH<sub>3</sub>(PCH(*n*-Bu))), 0.92–1.92 (m, 12H, CH<sub>3</sub>(N(*n*-Bu))), 1.14–1.22 (m, 1H, PCH<sub>2</sub>), 1.23–1.32 (m, 4H, PCHCH<sub>2</sub>CH<sub>2</sub>CH<sub>2</sub>), 1.32–1.46 (m, 8H, NCH<sub>2</sub>CH<sub>2</sub>CH<sub>2</sub>), 1.45–1.55 (m, 2H, PCHCH<sub>2</sub>), 1.63–1.86 (m, 8H, NCH<sub>2</sub>CH<sub>2</sub>), 1.96 (m, 1H, PCH), 2.13 (m, 1H, PCH<sub>2</sub>), 4.18–4.37 (m, 8H, NCH<sub>2</sub>). <sup>13</sup>C{<sup>1</sup>H} NMR (125.75 MHz, 298.0 K, CD<sub>2</sub>Cl<sub>2</sub>):  $\delta$  / ppm = 14.0 (m, CH<sub>3</sub>), 20.4 (m, NCH<sub>2</sub>CH<sub>2</sub>CH<sub>2</sub>), 22.8 (s, PCHCH<sub>2</sub>CH<sub>2</sub>CH<sub>2</sub>), 28.2 (dd, <sup>1</sup>J<sub>P,C</sub> = 9.5 Hz, <sup>2</sup>J<sub>P,C</sub> = 4.1 Hz, PCH<sub>2</sub>), 31.6 (d, J<sub>P,C</sub> = 15.3 Hz, PCHCH<sub>2</sub>CH<sub>2</sub>), 32.3 (m, NCH<sub>2</sub>CH<sub>2</sub>), 32.4 (d, J<sub>P,C</sub> = 2.6 Hz, PCHCH<sub>2</sub>), 36.3 (dd, <sup>1</sup>J<sub>P,C</sub> = 7.3 Hz, <sup>2</sup>J<sub>P,C</sub> = 2.5 Hz, PCH), 49.0 (m, NCH<sub>2</sub>), 136.2 (dd, J<sub>P,C</sub> = 11.4 Hz, J<sub>P,C</sub> = 3.2 Hz, PC), 137.5 (dd, J<sub>P,C</sub> = 6.3 Hz, J<sub>P,C</sub> = 2.9 Hz, PC), 138.9 (dd, J<sub>P,C</sub> = 5.7 Hz, J<sub>P,C</sub> = 2.9 Hz, PC), 139.9 (dd, J<sub>P,C</sub> = 6.0 Hz, J<sub>P,C</sub> = 3.7 Hz, PC), 159.3 (s, CSe), 159.7 (s, CSe). <sup>31</sup>P NMR (202.44 MHz, 298.0 K, CD<sub>2</sub>Cl<sub>2</sub>):  $\delta$  / ppm = –91.4 (m, PCH<sub>2</sub>), –87.0 (m, PCH). <sup>31</sup>P{<sup>1</sup>H} NMR (202.44 MHz, 298.0 K, CD<sub>2</sub>Cl<sub>2</sub>):  $\delta$  / ppm = –91.4 (d, <sup>3</sup>J<sub>P,P</sub> = 17.3 Hz, PCH<sub>2</sub>), –87.0 (d, <sup>3</sup>J<sub>P,P</sub> = 17.6 Hz, PCH). <sup>77</sup>Se NMR (57.24 MHz, 298.0 K, CD<sub>2</sub>Cl<sub>2</sub>):  $\delta$  / ppm = 27.7 (s), 30.5 (s). MS (positive ESI): *m/z* = 663.174 (<1 %) [M+H]<sup>+</sup>, 583.258 (61) [M–Se+H]<sup>+</sup>. HR-MS (positive ESI): found: 663.174. Calc. for [C<sub>28</sub>H<sub>48</sub>N<sub>4</sub>P<sub>2</sub>Se<sub>2</sub>H]<sup>+</sup> 663.176.

### 2.3. Se-methylated imidazolium salt 3a

To a solution of 1.202 g (1.82 mmol, 1.0 eq.) of **2a** in 25 mL dichloromethane 0.44 mL (4.00 mmol, 2.2 eq.) MeOTf were added dropwise. After stirring for 2 h at ambient temperature the former light red solution had turned yellow and the solvent was removed *in vacuo* ( $\leq 0.05$  mbar). The resulting oily residue was washed three times with 10–20 mL diethyl ether each and three times 20 mL *n*-pentane at  $-50$  °C. After drying for 3 h ( $\leq 0.02$  mbar) a yellow, sticky solid in 97 % purity (3 % **4a**) was obtained. Yield: 1.349 g (1.36 mmol, 75 %). IR:  $\tilde{\nu}_{max}/\text{cm}^{-1} = 2962\text{m}$  and  $2935\text{m}$  ( $\nu_{as}(\text{CH}_3)$ ,  $\nu_s(\text{CH}_2)$ ),  $2876\text{m}$  ( $\nu_s(\text{CH}_3)$ ,  $\nu_{os}(\text{CH}_2)$ ).  $^1\text{H}$  NMR (500.04 MHz, 298.0 K,  $\text{CD}_2\text{Cl}_2$ ):  $\delta / \text{ppm} = 1.01$  (tm,  $^3J_{\text{H,H}} = 7.4$  Hz, 12H,  $\text{CH}_3(n\text{-Bu})$ ), 1.18 (t,  $^3J_{\text{H,H}} = 7.3$  Hz, 6H,  $\text{CH}_3(\text{Et})$ ), 1.30–1.35 (m, 2H,  $\text{PCHCH}_2$ ), 1.40–1.54 (m, 8H,  $\text{NCH}_2\text{CH}_2\text{CH}_2$ ), 1.63–1.74 (m, 2H,  $\text{PCHCH}_2$ ), 1.76–1.92 (m, 10H,  $\text{NCH}_2\text{CH}_2$ ,  $\text{PCH}$ ), 2.48 (s, 6H,  $\text{SeCH}_3$ ), 4.36–4.59 (m, 8H,  $\text{NCH}_2$ ).  $^{13}\text{C}\{^1\text{H}\}$  NMR (125.75 MHz, 298.0 K,  $\text{CD}_2\text{Cl}_2$ ):  $\delta / \text{ppm} = 11.2$  ( $s_{\text{sat}}$ ,  $^1J_{\text{Se,C}} = 56.1$  Hz,  $\text{SeCH}_3$ ), 13.7 (s,  $\text{CH}_3(n\text{-Bu})$ ), 13.8 (s,  $\text{CH}_3(n\text{-Bu})$ ), 13.9 (dd,  $J_{\text{P,C}} = 7.3$  Hz,  $\text{CH}_3(\text{Et})$ ), 20.2 (m,  $\text{NCH}_2\text{CH}_2\text{CH}_2$ ), 27.9 (dd,  $J_{\text{P,C}} = 9.4$  Hz,  $\text{PCHCH}_2$ ), 33.7 (dd,  $J_{\text{P,C}} = 2.0$  Hz,  $\text{NCH}_2\text{CH}_2$ ), 33.9 (dd,  $J_{\text{P,C}} = 2.0$  Hz,  $\text{NCH}_2\text{CH}_2$ ), 45.1 (dd,  $J_{\text{P,C}} = 5.2$  Hz,  $\text{PCH}$ ), 51.1 (dm,  $J_{\text{P,C}} = 29.8$  Hz,  $\text{NCH}_2$ ), 121.0 (q,  $^1J_{\text{F,C}} = 320.8$  Hz,  $\text{CF}_3$ ), 138.9 ( $s_{\text{sat}}$ ,  $^1J_{\text{Se,C}} = 181$  Hz,  $\text{CSeCH}_3$ ), 142.3 (m,  $\text{PC}$ ), 145.6 (dd,  $J_{\text{P,C}} = 8.9$  Hz,  $J_{\text{P,C}} = 6.5$  Hz,  $\text{PC}$ ).  $^{31}\text{P}$  NMR (202.44 MHz, 298.0 K,  $\text{CD}_2\text{Cl}_2$ ):  $\delta / \text{ppm} = -87.0$  (m).  $^{31}\text{P}\{^1\text{H}\}$  NMR (202.44 MHz, 298.0 K,  $\text{CD}_2\text{Cl}_2$ ):  $\delta / \text{ppm} = -87.0$  (s).  $^{77}\text{Se}$  NMR (57.24 MHz, 298.0 K,  $\text{CD}_2\text{Cl}_2$ ):  $\delta / \text{ppm} = 105.8$  (s). MS (positive ESI):  $m/z = 841.166$  (100)  $[\text{M}-\text{OTf}]^+$ , 346.107 (41)  $[\text{M}-2\text{OTf}]^{2+}$ , 304.060 (45)  $[\text{M}-\text{hexene}-2\text{OTf}]^{2+}$ . HR-MS (positive ESI): found: 841.1677 Calc. for  $[\text{C}_{31}\text{H}_{54}\text{F}_3\text{N}_4\text{O}_3\text{P}_2\text{SSe}_2]^+$  841.1674.

### 2.4. Se-methylated imidazolium salt 3b

To a solution of 0.500 g (0.76 mmol, 1.0 eq.) of **2b** in 15 mL dichloromethane 0.18 mL (1.67 mmol, 2.2 eq.) MeOTf were added dropwise. After stirring for 2 h at ambient temperature the former dark yellow solution had turned light yellow and the solvent was removed *in vacuo* ( $\leq 0.05$  mbar). The resulting oily residue was washed three times with 5 mL diethyl ether each and three times with 5 mL *n*-pentane each. After drying for 3 h ( $\leq 0.02$  mbar) a light yellow, sticky solid was obtained. IR:  $\tilde{\nu}_{max}/\text{cm}^{-1} = 2961\text{m}$  and  $2934\text{m}$  ( $\nu_{as}(\text{CH}_3)$ ,  $\nu_s(\text{CH}_2)$ ),  $2874\text{m}$  ( $\nu_s(\text{CH}_3)$ ,  $\nu_{os}(\text{CH}_2)$ ).  $^1\text{H}$  NMR (300.13 MHz, 298.0 K,  $\text{CD}_2\text{Cl}_2$ ):  $\delta / \text{ppm} = 0.90$  (t,  $^3J_{\text{H,H}} = 7.3$  Hz, 3H,  $\text{CH}_3(\text{PCH}(n\text{-Bu}))$ ), 0.96–1.07 (m, 12H,  $\text{CH}_3(\text{N}(n\text{-Bu}))$ ), 1.24–1.40 (m, 5H,  $\text{PCH}_2$ ,  $\text{PCHCH}_2\text{CH}_2\text{CH}_2$ ), 1.40–1.60 (m, 10H,  $\text{PCHCH}_2$ ,  $\text{NCH}_2\text{CH}_2\text{CH}_2$ ), 1.75–1.93 (m, 8H,  $\text{NCH}_2\text{CH}_2$ ), 2.33–2.46 (m, 1H,  $\text{PCH}$ ), 2.55–2.74 (m, 1H,  $\text{PCH}_2$ ), 2.47 (s, 3H,  $\text{SeCH}_3$ ), 2.49 (s, 3H,  $\text{SeCH}_3$ ), 4.36–4.60 (m, 8H,  $\text{NCH}_2$ ).  $^{13}\text{C}\{^1\text{H}\}$  NMR (75.48 MHz, 298.0 K,  $\text{CD}_2\text{Cl}_2$ ):  $\delta / \text{ppm} = 11.1$  (s,  $\text{SeCH}_3$ ), 11.3 (s,  $\text{SeCH}_3$ ), 13.7 (br s,  $\text{CH}_3(\text{N}(n\text{-Bu}))$ ), 14.0 (s,  $\text{CH}_3(\text{PCH}(n\text{-Bu}))$ ), 20.3 (m,  $\text{NCH}_2\text{CH}_2\text{CH}_2$ ), 22.7 (s,  $\text{PCHCH}_2\text{CH}_2\text{CH}_2$ ), 26.4 (m,  $\text{PCH}_2$ ), 31.5 (d,  $J_{\text{P,C}} = 15.3$  Hz,  $\text{PCHCH}_2\text{CH}_2$ ), 33.7 (m,  $\text{NCH}_2\text{CH}_2$ ), 34.1 (d,  $J_{\text{P,C}} = 2.6$  Hz,  $\text{PCHCH}_2$ ), 35.3 (m,  $\text{PCH}$ ), 50.9–51.2 (m,  $\text{NCH}_2$ ), 120.9 (q,  $^1J_{\text{F,C}} = 320.8$  Hz,  $\text{CF}_3$ ), 138.3 (m,  $\text{CSeCH}_3$ ), 138.4 (m,  $\text{CSeCH}_3$ ), 141.9 (dd,  $J_{\text{P,C}} = 19.4$  Hz,  $J_{\text{P,C}} = 3.5$  Hz,  $\text{PC}$ ), 142.1 (dd,  $J_{\text{P,C}} = 13.2$  Hz,  $J_{\text{P,C}} = 3.5$  Hz,  $\text{PC}$ ), 144.9–145.2 (m,  $\text{PC}$ ).  $^{31}\text{P}$  NMR (121.51 MHz, 298.0 K,  $\text{CD}_2\text{Cl}_2$ ):  $\delta / \text{ppm} = -91.2$  (m,  $\text{PCH}_2$ ),  $-87.0$  (m,  $\text{PCH}$ ).  $^{31}\text{P}\{^1\text{H}\}$  NMR (121.51 MHz, 298.0 K,  $\text{CD}_2\text{Cl}_2$ ):  $\delta / \text{ppm} = -91.2$  (d,  $^3J_{\text{P,P}} = 16.7$  Hz,  $\text{PCH}_2$ ),  $-87.0$  (d,  $^3J_{\text{P,P}} = 16.7$  Hz,  $\text{PCH}$ ).  $^{77}\text{Se}$  NMR (57.24 MHz, 298.0 K,  $\text{CD}_2\text{Cl}_2$ ):  $\delta / \text{ppm} = 102.8$  (s), 103.5 (s). MS (positive ESI):  $m/z = 841.172$  (100)  $[\text{M}-\text{OTf}]^+$ , 346.110 (88)  $[\text{M}-2\text{OTf}]^{2+}$ , 304.062 (92)  $[\text{M}-\text{hexene}-2\text{OTf}]^{2+}$ . HR-MS (positive ESI): found: 841.1673. Calc. for  $[\text{C}_{31}\text{H}_{54}\text{F}_3\text{N}_4\text{O}_3\text{P}_2\text{SSe}_2]^+$  841.1674.

### 2.5. Imidazolium salt 4a

To a solution of 1.016 g (1.03 mmol, 1.0 eq.) of **3a** in 20 mL methanol 0.194 g (5.13 mmol, 5.0 eq.)  $\text{NaBH}_4$  were added at  $-20$  °C which resulted in a darkening of the yellow solution and gas formation (MeSeH). After stirring for 20 min the gas evolution had stopped and 0.438 g (3.18 mmol, 3.1 eq.)

[Et<sub>3</sub>NH]Cl were added. The suspension was let warm up to ambient temperature and the solvent was removed *in vacuo* ( $\leq 0.05$  mbar). The resulting yellow, oily residue was filtered over a bed of celite® and silica (d = 4 cm, h = 1 cm each) with 250 mL tetrahydrofuran. After solvent removal *in vacuo* ( $\leq 0.05$  mbar), extraction with three times 5–10 mL dichloromethane, followed by solvent evaporation, the yellow residue was washed with three times 10 mL *n*-pentane at  $-20$  °C and dried for 3 h ( $\leq 0.02$  mbar) yielding a waxy, yellow solid. Yield: 0.540 g (66 %). IR:  $\tilde{\nu}_{max}/\text{cm}^{-1} = 3113\text{w}$  and  $3043\text{w}$  ( $\nu(\text{CH})$ ),  $2963\text{w}$  and  $2934\text{m}$  ( $\nu_{as}(\text{CH}_3)$ ,  $\nu_s(\text{CH}_2)$ ),  $2874\text{m}$  ( $\nu_s(\text{CH}_3)$ ,  $\nu_{as}(\text{CH}_2)$ ). <sup>1</sup>H NMR (500.04 MHz, 298.0 K, CD<sub>2</sub>Cl<sub>2</sub>):  $\delta / \text{ppm} = 0.93\text{--}1.01$  (m, 12H, CH<sub>3</sub>(*n*-Bu)), 1.15 (t, <sup>3</sup>J<sub>H,H</sub> = 7.2 Hz, 6H, CH<sub>3</sub>(Et)), 1.24–1.33 (m, 2H, PCHCH<sub>2</sub>), 1.30–1.46 (m, 8H, NCH<sub>2</sub>CH<sub>2</sub>CH<sub>2</sub>), 1.57–1.66 (m, 2H, PCHCH<sub>2</sub>), 1.66–1.73 (m, 2H, PCH), 1.81–1.91 (m, 8H, NCH<sub>2</sub>CH<sub>2</sub>), 4.24–4.32 (m, 4H, NCH<sub>2</sub>), 4.32–4.42 (m, 4H, NCH<sub>2</sub>), 9.03 (t, <sup>4</sup>J<sub>P,H</sub> = 2.9 Hz, CH). <sup>13</sup>C{<sup>1</sup>H} NMR (125.75 MHz, 298.0 K, CD<sub>2</sub>Cl<sub>2</sub>):  $\delta / \text{ppm} = 13.5$  (s, CH<sub>3</sub>(*n*-Bu)), 13.6 (s, CH<sub>3</sub>(*n*-Bu)), 13.8 (m, CH<sub>3</sub>(Et)), 19.9 (m, NCH<sub>2</sub>CH<sub>2</sub>CH<sub>2</sub>), 20.0 (m, NCH<sub>2</sub>CH<sub>2</sub>CH<sub>2</sub>), 28.0 (m, PCHCH<sub>2</sub>), 33.0 (m, NCH<sub>2</sub>CH<sub>2</sub>), 33.2 (m, NCH<sub>2</sub>CH<sub>2</sub>), 45.1 (dd, J<sub>P,C</sub> = 5.4 Hz, PCH), 50.0 (tm, J<sub>P,C</sub> = 4.1 Hz, NCH<sub>2</sub>), 121.0 (q, <sup>1</sup>J<sub>F,C</sub> = 320.2 Hz, CF<sub>3</sub>), 139.6 (s, CH), 141.1 (dd, J<sub>P,C</sub> = 12.8 Hz, J<sub>P,C</sub> = 8.1, PC), 143.9 (dd, J<sub>P,C</sub> = 8.8 Hz, J<sub>P,C</sub> = 6.6 Hz, PC). <sup>31</sup>P NMR (202.44 MHz, 298.0 K, CD<sub>2</sub>Cl<sub>2</sub>):  $\delta / \text{ppm} = -90.4$  (m). <sup>31</sup>P{<sup>1</sup>H} NMR (202.44 MHz, 298.0 K, CD<sub>2</sub>Cl<sub>2</sub>):  $\delta / \text{ppm} = -90.4$  (s). MS (positive ESI):  $m/z = 653.304$  (100) [M-OTf]<sup>+</sup>, 252.176 (15) [M-2OTf]<sup>2+</sup>, 210.129 (35) [M-2OTf-hexene]<sup>2+</sup>. MS (negative ESI):  $m/z = 149.0$  (100) [OTf]<sup>-</sup>. HR-MS (positive ESI): found: 653.3027. Calc. for [C<sub>29</sub>H<sub>50</sub>F<sub>3</sub>N<sub>4</sub>O<sub>3</sub>P<sub>2</sub>S]<sup>+</sup> 653.3025.

## 2.6. Imidazolium salt 4b

To a solution of 0.563 g (0.57 mmol, 1.0 eq.) of **3b** in 9 mL methanol 0.108 g (2.84 mmol, 5.0 eq.) NaBH<sub>4</sub> were added at  $-20$  °C which resulted in a darkening of the yellow solution and gas formation (MeSeH). After stirring for 20 min the gas evolution had stopped and 0.243 g (1.76 mmol, 3.1 eq.) [Et<sub>3</sub>NH]Cl were added. The suspension was let warm up to ambient temperature and the solvent was removed *in vacuo* ( $\leq 0.05$  mbar). The resulting light yellow, oily residue was filtered over a bed of celite® and silica (d = 2 cm, h = 1 cm each) with 100 mL tetrahydrofuran. After solvent removal *in vacuo* ( $\leq 0.05$  mbar), extraction with three times 5–10 mL dichloromethane, followed by solvent evaporation, the light yellow residue was washed with five times 8 mL *n*-pentane at  $-20$  °C and dried for 2 h ( $\leq 0.02$  mbar) yielding a sticky, beige solid. Yield: 0.207 g (46 %). IR:  $\tilde{\nu}_{max}/\text{cm}^{-1} = 3117\text{w}$  and  $3042\text{w}$  ( $\nu(\text{CH})$ ),  $2962\text{w}$  and  $2934\text{m}$  ( $\nu_{as}(\text{CH}_3)$ ,  $\nu_s(\text{CH}_2)$ ),  $2875\text{m}$  ( $\nu_s(\text{CH}_3)$ ,  $\nu_{as}(\text{CH}_2)$ ). <sup>1</sup>H NMR (500.04 MHz, 298.0 K, CD<sub>2</sub>Cl<sub>2</sub>):  $\delta / \text{ppm} = 0.90$  (t, <sup>3</sup>J<sub>H,H</sub> = 7.3 Hz, 3H, CH<sub>3</sub>(PCH(*n*-Bu))), 0.93–1.01 (m, 12H, CH<sub>3</sub>(N(*n*-Bu))), 1.26–1.34 (m, 4H, PCHCH<sub>2</sub>CH<sub>2</sub>CH<sub>2</sub>), 1.34–1.42 (m, 8H, NCH<sub>2</sub>CH<sub>2</sub>CH<sub>2</sub>), 1.42–1.56 (m, 3H, PCHCH<sub>2</sub>, PCH<sub>2</sub>), 1.79–1.92 (m, 8H, NCH<sub>2</sub>CH<sub>2</sub>), 2.27–2.37 (m, 1H, PCH), 2.45–2.56 (m, 1H, PCH<sub>2</sub>), 4.26–4.42 (m, 8H, NCH<sub>2</sub>), 8.88 (dd, <sup>4</sup>J<sub>P,H</sub> = 3.0 Hz, CH), 9.06 (dd, <sup>4</sup>J<sub>P,H</sub> = 2.9 Hz). <sup>13</sup>C{<sup>1</sup>H} NMR (125.75 MHz, 298.0 K, CD<sub>2</sub>Cl<sub>2</sub>):  $\delta / \text{ppm} = 13.5$  (s, CH<sub>3</sub>(N(*n*-Bu))), 13.9 (s, CH<sub>3</sub>(PCH(*n*-Bu))), 20.0 (m, NCH<sub>2</sub>CH<sub>2</sub>CH<sub>2</sub>), 22.7 (s, PCHCH<sub>2</sub>CH<sub>2</sub>CH<sub>2</sub>), 26.5 (dd, J<sub>P,C</sub> = 10.1 Hz, J<sub>P,C</sub> = 3.5 Hz, PCH<sub>2</sub>), 31.5 (d, J<sub>P,C</sub> = 15.6 Hz, PCHCH<sub>2</sub>CH<sub>2</sub>), 33.1 (m, NCH<sub>2</sub>CH<sub>2</sub>), 35.1 (d, J<sub>P,C</sub> = 16.3 Hz, PCHCH<sub>2</sub>), 35.4 (dd, J<sub>P,C</sub> = 7.2 Hz, J<sub>P,C</sub> = 1.9 Hz, PCH), 50.0 (m, NCH<sub>2</sub>), 120.8 (q, <sup>1</sup>J<sub>F,C</sub> = 320.1 Hz, CF<sub>3</sub>), 138.8 (s, CH), 139.4 (s, CH), 140.4 (dd, J<sub>P,C</sub> = 17.8 Hz, J<sub>P,C</sub> = 4.3 Hz, PC), 141.6 (dd, J<sub>P,C</sub> = 12.4 Hz, J<sub>P,C</sub> = 4.0 Hz, PC), 143.3 (dd, J<sub>P,C</sub> = 12.2 Hz, J<sub>P,C</sub> = 4.0 Hz, PC), 143.7 (dd, J<sub>P,C</sub> = 11.4 Hz, J<sub>P,C</sub> = 4.7 Hz, PC). <sup>31</sup>P NMR (202.44 MHz, 298.0 K, CD<sub>2</sub>Cl<sub>2</sub>):  $\delta / \text{ppm} = -94.4$  (m, PCH<sub>2</sub>),  $-91.0$  (m, PCH). <sup>31</sup>P{<sup>1</sup>H} NMR (202.44 MHz, 298.0 K, CD<sub>2</sub>Cl<sub>2</sub>):  $\delta / \text{ppm} = -94.4$  (d, <sup>3</sup>J<sub>P,P</sub> = 16.0 Hz, PCH<sub>2</sub>),  $-91.0$  (d, <sup>3</sup>J<sub>P,P</sub> = 16.0 Hz, PCH). MS (positive ESI):  $m/z = 653.301$  (100) [M-OTf]<sup>+</sup>, 252.174 (55) [M-2OTf]<sup>2+</sup>, 210.128 (39) [M-2OTf-hexene]<sup>2+</sup>. MS (negative ESI):  $m/z = 149.0$  (100) [OTf]<sup>-</sup>. HR-MS (positive ESI): found: 653.3029. Calc. for [C<sub>29</sub>H<sub>50</sub>F<sub>3</sub>N<sub>4</sub>O<sub>3</sub>P<sub>2</sub>S]<sup>+</sup> 653.3025.



## 2.7. Bis(NHC) 5a

To a solution of 0.561 g (0.70 mmol, 1.0 eq.) of **4a** in 7.5 mL THF 0.338 g (1.69 mmol, 2.2 eq.) KHMDS in two portions of 1–1.5 mL THF each were added via a syringe, resulting in an orange, slightly turbid solution. After stirring for 15 min at ambient temperature the solvent was removed *in vacuo* ( $\leq 0.05$  mbar) at the same temperature. The resulting yellow solid mixed with an orange, oily residue was extracted with three times 3–6 mL *n*-pentane. After removal of the solvent *in vacuo* ( $\leq 0.05$  mbar) at ambient temperature and drying for 6 h ( $\leq 0.02$  mbar) an orange oil was obtained (still containing traces of HMDS). Yield: 0.15 g (43 %). IR:  $\tilde{\nu}_{max}/\text{cm}^{-1} = 2957\text{w}$  and  $2931\text{m}$  ( $\nu_{as}(\text{CH}_3)$ ,  $\nu_s(\text{CH}_2)$ ),  $2872\text{m}$  ( $\nu_s(\text{CH}_3)$ ,  $\nu_{as}(\text{CH}_2)$ ).  $^1\text{H}$  NMR (500.04 MHz, 298.0 K,  $\text{C}_6\text{D}_6$ ):  $\delta / \text{ppm} = 0.84$  (t,  $^3J_{\text{H,H}} = 7.3$  Hz, 12H,  $\text{CH}_3(n\text{-Bu})$ ),  $0.96$  (t,  $^3J_{\text{H,H}} = 7.2$  Hz, 6H,  $\text{CH}_3(\text{Et})$ ),  $1.05\text{--}1.11$  (m, 2H,  $\text{PCHCH}_2$ ),  $1.14\text{--}1.21$  (m, 2H,  $\text{PCHCH}_2$ ),  $1.21\text{--}1.37$  (m, 10H,  $\text{NCH}_2\text{CH}_2\text{CH}_2$ ,  $\text{PCHCH}_2$ ),  $1.79\text{--}1.95$  (m, 8H,  $\text{NCH}_2\text{CH}_2$ ),  $4.19\text{--}4.31$  (m, 8H,  $\text{NCH}_2$ ).  $^{13}\text{C}\{^1\text{H}\}$  NMR (125.75 MHz, 298.0 K,  $\text{C}_6\text{D}_6$ ):  $\delta / \text{ppm} = 13.9\text{--}14.1$  (m,  $\text{CH}_3(n\text{-Bu})$ ,  $\text{CH}_3(\text{Et})$ ),  $20.1$  (s,  $\text{NCH}_2\text{CH}_2\text{CH}_2$ ),  $28.4$  (m,  $\text{PCHCH}_2$ ),  $35.1$  (br s,  $\text{NCH}_2\text{CH}_2$ ),  $35.2$  (br s,  $\text{NCH}_2\text{CH}_2$ ),  $46.2$  (dd,  $J_{\text{P,C}} = 6.0$  Hz,  $\text{PCH}$ ),  $50.0$  (s,  $\text{NCH}_2$ ),  $50.1$  (s,  $\text{NCH}_2$ ),  $139.3$  (m,  $\text{PC}$ ),  $141.7$  (m,  $\text{PC}$ ),  $218.4$  (br s,  $\text{C}^2$ ).  $^{31}\text{P}$  NMR (202.44 MHz, 298.0 K,  $\text{C}_6\text{D}_6$ ):  $\delta / \text{ppm} = -86.2$  (m).  $^{31}\text{P}\{^1\text{H}\}$  NMR (202.44 MHz, 298.0 K,  $\text{C}_6\text{D}_6$ ):  $\delta / \text{ppm} = -86.2$  (s). MS (APCI):  $m/z = 539.364$  (60)  $[\text{M}+\text{H}+2\text{H}_2\text{O}]^+$ ,  $521.353$  (100)  $[\text{M}+\text{H}+\text{H}_2\text{O}]^+$ ,  $503.343$  (1)  $[\text{M}+\text{H}]^+$ ,  $437.259$  (36)  $[\text{M}\text{-hexene}+\text{H}+\text{H}_2\text{O}]^+$ ,  $419.249$  (4)  $[\text{M}\text{-hexene}+\text{H}]^+$ . HR-MS (APCI): found: 503.3425. Calc. for  $[\text{C}_{28}\text{H}_{48}\text{N}_4\text{P}_2\text{H}]^+$  503.3427.

## 2.8. Bis(NHC) 5b

0.147 g (0.18 mmol, 1.0 eq.) of **4b** and 0.080 g (0.40 mmol, 2.2 eq.) KHMDS were dissolved in 3 mL THF, resulting in an orange, slightly turbid solution. After stirring for 15 min at ambient temperature the solvent was removed *in vacuo* ( $\leq 0.05$  mbar) at the same temperature. The resulting colourless solid mixed with an yellow, oily residue was extracted with three times 5 mL diethyl ether. After removal of the solvent *in vacuo* ( $\leq 0.05$  mbar) at ambient temperature and drying for 5 h ( $\leq 0.02$  mbar) a yellow-orange oil was obtained (still containing traces of HMDS). Yield: 0.050 g (54 %). IR:  $\tilde{\nu}_{max}/\text{cm}^{-1} = 2956\text{w}$  and  $2928\text{m}$  ( $\nu_{as}(\text{CH}_3)$ ,  $\nu_s(\text{CH}_2)$ ),  $2872\text{m}$  ( $\nu_s(\text{CH}_3)$ ,  $\nu_{as}(\text{CH}_2)$ ).  $^1\text{H}$  NMR (500.04 MHz, 298.0 K,  $\text{C}_6\text{D}_6$ ):  $\delta / \text{ppm} = 0.78\text{--}0.86$  (m, 15H,  $\text{CH}_3(\text{PCH}(n\text{-Bu}))$ ,  $\text{CH}_3(\text{N}(n\text{-Bu}))$ ),  $0.87\text{--}0.91$  (m, 1H,  $\text{PCH}_2$ ),  $0.92\text{--}0.99$  (m, 2H,  $\text{PCHCH}_2\text{CH}_2\text{CH}_2$ ),  $1.21\text{--}1.32$  (m, 10H,  $\text{NCH}_2\text{CH}_2\text{CH}_2$ ,  $\text{PCHCH}_2\text{CH}_2$ ),  $1.33\text{--}1.39$  (m, 8H,  $\text{NCH}_2\text{CH}_2\text{CH}_2$ ),  $\text{PCHCH}_2$ ),  $1.59\text{--}1.66$  (m, 1H,  $\text{PCH}$ ),  $1.66\text{--}1.75$  (m, 1H,  $\text{PCH}_2$ ),  $1.79\text{--}1.98$  (m, 8H,  $\text{NCH}_2\text{CH}_2$ ),  $4.22\text{--}4.31$  (m, 8H,  $\text{NCH}_2$ ).  $^{13}\text{C}\{^1\text{H}\}$  NMR (125.75 MHz, 298.0 K,  $\text{C}_6\text{D}_6$ ):  $\delta / \text{ppm} = 13.9\text{--}14.0$  (m,  $\text{CH}_3$ ),  $20.1\text{--}20.2$  (m,  $\text{NCH}_2\text{CH}_2\text{CH}_2$ ),  $22.8$  (s,  $\text{PCHCH}_2\text{CH}_2\text{CH}_2$ ),  $28.2$  (dd,  $^1J_{\text{P,C}} = 9.1$  Hz,  $^2J_{\text{P,C}} = 4.8$  Hz,  $\text{PCH}_2$ ),  $31.7$  (d,  $J_{\text{P,C}} = 14.9$  Hz,  $\text{PCHCH}_2$ ),  $34.9\text{--}35.3$  (m,  $\text{NCH}_2\text{CH}_2$ ),  $35.7\text{--}35.8$  (m,  $\text{PCH}$ ),  $35.9$  (br s,  $\text{PCHCH}_2\text{CH}_2$ ),  $49.8\text{--}50.0$  (m,  $\text{NCH}_2$ ),  $138.7$  (d,  $J_{\text{P,C}} = 13.7$  Hz,  $\text{PC}$ ),  $139.7$  (d,  $J_{\text{P,C}} = 9.0$  Hz,  $\text{PC}$ ),  $140.7$  (d,  $J_{\text{P,C}} = 8.6$  Hz,  $\text{PC}$ ),  $142.0$  (d,  $J_{\text{P,C}} = 8.3$  Hz,  $\text{PC}$ ),  $219.9$  (t,  $^3J_{\text{P,C}} = 2.7$  Hz,  $\text{C}^2$ ),  $220.5$  (t,  $^3J_{\text{P,C}} = 3.0$  Hz,  $\text{C}^2$ ).  $^{31}\text{P}$  NMR (202.44 MHz, 298.0 K,  $\text{C}_6\text{D}_6$ ):  $\delta / \text{ppm} = -92.0$  (m,  $\text{PCH}_2$ ),  $-86.4$  (m,  $\text{PCH}$ ).  $^{31}\text{P}\{^1\text{H}\}$  NMR (202.44 MHz, 298.0 K,  $\text{C}_6\text{D}_6$ ):  $\delta / \text{ppm} = -92.0$  (d,  $^3J_{\text{P,P}} = 19.7$  Hz,  $\text{PCH}_2$ ),  $-86.4$  (d,  $^3J_{\text{P,P}} = 19.4$  Hz,  $\text{PCH}$ ). MS (APCI):  $m/z = 539.364$  (100)  $[\text{M}+\text{H}+2\text{H}_2\text{O}]^+$ ,  $521.353$  (77)  $[\text{M}+\text{H}+\text{H}_2\text{O}]^+$ ,  $503.343$  ( $<1$ )  $[\text{M}+\text{H}]^+$ ,  $419.249$  (1)  $[\text{M}\text{-hexene}+\text{H}]^+$ . HR-MS (APCI): found: 503.3429. Calc. for  $[\text{C}_{28}\text{H}_{48}\text{N}_4\text{P}_2\text{H}]^+$  503.3427.

## 2.9. $\text{BCl}_3$ -Bis(NHC) adduct 6a

To a solution of 0.116 g (0.23 mmol, 1.00 eq.) **5a** in 4 mL toluene 0.438 mL (0.438 mmol, 1.9 eq.)  $\text{BCl}_3$  (1M in hexane) were added dropwise yielding a colourless solution and orange precipitate. After 3 h the solvent was removed *in vacuo* ( $5 \cdot 10^{-2}$  mbar). The residue was extracted with three times 5 mL

toluene and the solvent evaporated. After washing with two times 3 mL *n*-pentane at  $-40\text{ }^{\circ}\text{C}$  and drying for several hours the adduct was obtained as colourless solid. Yield: 0.010 g (6 %). Mp:  $150\text{ }^{\circ}\text{C}$  (dec.). IR:  $\tilde{\nu}_{max}/\text{cm}^{-1} = 2963\text{w}$  and  $2932\text{m}$  ( $\nu_{as}(\text{CH}_3)$ ,  $\nu_s(\text{CH}_2)$ ),  $2875\text{m}$  ( $\nu_s(\text{CH}_3)$ ,  $\nu_{as}(\text{CH}_2)$ ).  $^1\text{H}$  NMR (500.04 MHz,  $298.0\text{ K}$ ,  $\text{C}_6\text{D}_6$ ): 0.77-0.86 (m, 18H,  $\text{CH}_3(n\text{-Bu})$ ,  $\text{CH}_3(\text{Et})$ ), 0.93-0.99 (m, 2H,  $\text{P-CHCH}_2\text{CH}_3$ ), 1.00-1.09 (m, 2H,  $\text{P-CHCH}_2\text{CH}_3$ ), 1.18-1.35 (m, 10H,  $\text{NCH}_2\text{CH}_2\text{CH}_2\text{CH}_3$ ,  $\text{P-CHCH}_2\text{CH}_3$ ), 1.78-2.02 (m, 8H,  $\text{NCH}_2\text{CH}_2\text{CH}_2\text{CH}_3$ ), 4.68-4.92 (m, 8H,  $\text{NCH}_2\text{CH}_2\text{CH}_2\text{CH}_3$ ).  $^{13}\text{C}\{^1\text{H}\}$  NMR (125.75 MHz,  $298.0\text{ K}$ ,  $\text{C}_6\text{D}_6$ ): 13.6-13.8 (m,  $\text{CH}_3(n\text{-Bu})$ ,  $\text{CH}_3(\text{Et})$ ), 20.0 (s,  $\text{NCH}_2\text{CH}_2\text{CH}_2\text{CH}_3$ ), 20.1 (s,  $\text{NCH}_2\text{CH}_2\text{CH}_2\text{CH}_3$ ), 27.5 (m,  $\text{P-CHCH}_2\text{CH}_3$ ), 34.6-34.8 (m,  $\text{NCH}_2\text{CH}_2\text{CH}_2\text{CH}_3$ ), 45.8 (t,  $J_{\text{P,C}} = 6.0\text{ Hz}$ ,  $\text{P-CHCH}_2\text{CH}_3$ ), 50.2-50.4 (m,  $\text{NCH}_2\text{CH}_2\text{CH}_2\text{CH}_3$ ), 139.6 (m, P-C), 142.7 (m, P-C). Due to its quartet splitting the  $\text{C}^2$  was not observed.  $^{31}\text{P}$  NMR (202.44 MHz,  $298.0\text{ K}$ ,  $\text{C}_6\text{D}_6$ ):  $\delta / \text{ppm} = -86.8$  (m).  $^{31}\text{P}\{^1\text{H}\}$  NMR (202.44 MHz,  $298.0\text{ K}$ ,  $\text{C}_6\text{D}_6$ ):  $\delta / \text{ppm} = -86.8$  (s).  $^{11}\text{B}\{^1\text{H}\}$  NMR (160.14 MHz,  $298.0\text{ K}$ ,  $\text{C}_6\text{D}_6$ ):  $\delta / \text{ppm} = 2.6$  (s). MS (positive ESI):  $m/z = 619.258$  (9)  $[\text{M}+\text{H}-\text{BCl}_3]^+$ , 252.175 (100)  $[\text{M}+2\text{ H}-2\text{ BCl}_3]^{2+}$ , 210.128 (87)  $[\text{M}+2\text{ H}-2\text{ BCl}_3\text{-hexene}]^+$ . HR-MS (positive ESI): found: 619.2582. Calc. for  $[\text{C}_{28}\text{H}_{48}\text{BCl}_3\text{N}_4\text{P}_2\text{H}]^+$  619.2592.

### 2.10. $\text{CS}_2$ -Bis(NHC) adduct 7a

To a solution of 0.094 g (0.187 mmol, 1.00) **5a** in 3 mL toluene 0.023 mL (0.029 g, 0.374 mmol, 2.00 eq.)  $\text{CS}_2$  was added dropwise yielding an immediate colour change to dark red. After 1 h the solvent was removed *in vacuo* ( $5 \cdot 10^{-2}$  mbar) and the red, oily residue was extracted with three times 2–5 mL toluene. After solvent removal, washing with three times 3–5 mL *n*-pentane at  $-60\text{ }^{\circ}\text{C}$  and drying for several hours the adduct was obtained as burgundy coloured solid. Yield: 61 %. Mp:  $96\text{ }^{\circ}\text{C}$ . Elemental analysis: Found: C, 54.6; H, 7.1; N, 8.5. Calc. for  $\text{C}_{30}\text{H}_{48}\text{N}_4\text{P}_2\text{S}_4$ : C, 55.0; H, 7.4; N, 8.6 %. UV/vis:  $\lambda_{max}(\text{toluene})/\text{nm}$  (abs.) = 290 (0.65, NCN), 363 (1,  $\text{CS}_2$ ). IR:  $\tilde{\nu}_{max}/\text{cm}^{-1} = 2956\text{w}$  and  $2930\text{m}$  ( $\nu_{as}(\text{CH}_3)$ ,  $\nu_s(\text{CH}_2)$ ),  $2870\text{m}$  ( $\nu_s(\text{CH}_3)$ ,  $\nu_{as}(\text{CH}_2)$ ),  $1469\text{m}$  ( $\nu_{as}(\text{NCN}^+)$ ),  $1054\text{s}$  ( $\nu_{as}(\text{CS}_2^-)$ ).  $^1\text{H}$  NMR (500.04 MHz,  $298.0\text{ K}$ ,  $\text{C}_6\text{D}_6$ ): 0.79 (dm,  $^3J_{\text{H,H}} = 7.3\text{ Hz}$ , 12H,  $\text{CH}_3(n\text{-Bu})$ ), 0.86-0.93 (m, 8H,  $\text{CH}_3(\text{Et})$ ,  $\text{P-CHCH}_2\text{CH}_3$ ), 1.10-1.27 (m, 12H,  $\text{NCH}_2\text{CH}_2\text{CH}_2\text{CH}_3$ ,  $\text{P-CHCH}_2\text{CH}_3$ ), 1.75-1.85 (m, 2H,  $\text{NCH}_2\text{CH}_2\text{CH}_2\text{CH}_3$ ), 1.92 (tt,  $^3J_{\text{H,H}} = 7.6\text{ Hz}$ , 4H,  $\text{NCH}_2\text{CH}_2\text{CH}_2\text{CH}_3$ ), 1.97-2.05 (m, 2H,  $\text{NCH}_2\text{CH}_2\text{CH}_2\text{CH}_3$ ), 4.23-4.43 (m, 8H,  $\text{NCH}_2\text{CH}_2\text{CH}_2\text{CH}_3$ ).  $^{13}\text{C}\{^1\text{H}\}$  NMR (125.75 MHz,  $298.0\text{ K}$ ,  $\text{C}_6\text{D}_6$ ): 13.8 (s,  $\text{CH}_3(n\text{-Bu})$ ,  $\text{CH}_3(\text{Et})$ ), 13.8 (s,  $\text{CH}_3(n\text{-Bu})$ ,  $\text{CH}_3(\text{Et})$ ), 20.3-20.4 (m,  $\text{NCH}_2\text{CH}_2\text{CH}_2\text{CH}_3$ ), 27.7 (dd,  $J_{\text{P,C}} = 9.1\text{ Hz}$ ,  $\text{P-CHCH}_2\text{CH}_3$ ), 33.3 (m,  $\text{NCH}_2\text{CH}_2\text{CH}_2\text{CH}_3$ ), 33.4 (m,  $\text{NCH}_2\text{CH}_2\text{CH}_2\text{CH}_3$ ), 46.2 (dd,  $J_{\text{P,C}} = 6.0\text{ Hz}$ ,  $\text{P-CHCH}_2\text{CH}_3$ ), 48.3-48.5 (m,  $\text{NCH}_2\text{CH}_2\text{CH}_2\text{CH}_3$ ), 139.6 (dd,  $J_{\text{P,C}} = 10.6\text{ Hz}$ ,  $J_{\text{P,C}} = 7.0\text{ Hz}$ , P-C), 138.9 (m, P-C), 152.7 (s, C- $\text{CS}_2$ ), 223.8 (s,  $\text{CS}_2$ ).  $^{31}\text{P}$  NMR (202.44 MHz,  $298.0\text{ K}$ ,  $\text{C}_6\text{D}_6$ ):  $\delta / \text{ppm} = -87.1$  (m).  $^{31}\text{P}\{^1\text{H}\}$  NMR (202.44 MHz,  $298.0\text{ K}$ ,  $\text{C}_6\text{D}_6$ ):  $\delta / \text{ppm} = -87.1$  (s). MS (positive ESI):  $m/z = 655.230$  (47)  $[\text{M}+\text{H}]^+$ . HR-MS (positive ESI): found: 655.2312. Calc. for  $[\text{C}_{30}\text{H}_{48}\text{N}_4\text{P}_2\text{S}_4\text{H}]^+$  655.2310.

### 2.11. $\text{PPh}_2$ -Bis(NHC) adduct 8a

To a solution of 0.097 g (0.12 mmol, 1.00 eq.) **4a** in 9 mL THF 0.053 g (0.27 mmol, 2.20 eq.) KHMDS were added in 4 mL THF at  $-80\text{ }^{\circ}\text{C}$ . After 5 minutes  $\text{Ph}_2\text{PCl}$  was added and after stirring for 0.5 h the solution had turned colourless and the solvent was removed *in vacuo* ( $5 \cdot 10^{-2}$  mbar) leaving a colourless, oily residue. After extraction with three times 4-10 mL toluene, evaporation of the solvent, washing with three times 5-10 mL *n*-pentane and drying for several hours the adduct was obtained as a yellow solid. Yield: 0.084 g (59 %). Mp:  $108\text{ }^{\circ}\text{C}$ . IR:  $\tilde{\nu}_{max}/\text{cm}^{-1} = 2961\text{w}$  and  $2932\text{m}$  ( $\nu_{as}(\text{CH}_3)$ ,  $\nu_s(\text{CH}_2)$ ),  $2874\text{m}$  ( $\nu_s(\text{CH}_3)$ ,  $\nu_{as}(\text{CH}_2)$ ).  $^1\text{H}$  NMR (400.13 MHz,  $298.0\text{ K}$ ,  $\text{C}_6\text{D}_6$ ):  $\delta / \text{ppm} = 0.54\text{-}0.68$  (m, 12H,  $\text{NCH}_2\text{CH}_2\text{CH}_2\text{CH}_3$ ), 0.71-0.96 (m, 8H,  $\text{NCH}_2\text{CH}_2\text{CH}_2\text{CH}_3$ ), 1.26 (t,  $^3J_{\text{H,H}} = 7.25\text{ Hz}$ , 6H,  $\text{PCHCH}_2\text{CH}_3$ ), 1.20-1.34 (m, 4H,  $\text{NCH}_2\text{CH}_2\text{CH}_2\text{CH}_3$ ), 1.35-1.4 (m, 4H,  $\text{NCH}_2\text{CH}_2\text{CH}_2\text{CH}_3$ ), 1.50-1.66 (m, 2H,  $\text{PCHCH}_2\text{CH}_3$ ), 1.78-1.97 (m, 2H,  $\text{PCHCH}_2\text{CH}_3$ ), 2.42-2.55 (m, 2H,  $\text{PCHCH}_2\text{CH}_3$ ), 4.37-4.57 (m, 4H,  $\text{NCH}_2\text{CH}_2\text{CH}_2\text{CH}_3$ ), 4.65-4.76

(m, 2H, NCH<sub>2</sub>CH<sub>2</sub>CH<sub>2</sub>CH<sub>3</sub>), 4.79-4.91 (m, 2H, NCH<sub>2</sub>CH<sub>2</sub>CH<sub>2</sub>CH<sub>3</sub>), 6.98-7.7.09 (m, 4H, *para*-CH), 7.15-7.23 (m, 4H, *meta*-CH), 7.29-7.39 (m, 4H, *meta*-CH), 7.51-7.64 (dt, <sup>3</sup>J<sub>P,H</sub> = 15.4 Hz, <sup>3</sup>J<sub>H,H</sub> = 7.8 Hz, 8H, *ortho*-CH). <sup>13</sup>C{<sup>1</sup>H} NMR (100.63 MHz, 298.0 K, C<sub>6</sub>D<sub>6</sub>): δ / ppm = 13.5 (s, NCH<sub>2</sub>CH<sub>2</sub>CH<sub>2</sub>CH<sub>3</sub>), 13.6 (s, NCH<sub>2</sub>CH<sub>2</sub>CH<sub>2</sub>CH<sub>3</sub>), 13.9 (m, PCHCH<sub>2</sub>CH<sub>3</sub>), 19.9 (s, NCH<sub>2</sub>CH<sub>2</sub>CH<sub>2</sub>CH<sub>3</sub>), 20.0 (s, NCH<sub>2</sub>CH<sub>2</sub>CH<sub>2</sub>CH<sub>3</sub>), 28.1 (m, PCHCH<sub>2</sub>CH<sub>3</sub>), 33.4 (m, NCH<sub>2</sub>CH<sub>2</sub>CH<sub>2</sub>CH<sub>3</sub>), 44.4 (m, PCHCH<sub>2</sub>CH<sub>3</sub>), 50.5 (dm, <sup>3</sup>J<sub>P,C</sub> = 9.9 Hz, NCH<sub>2</sub>CH<sub>2</sub>CH<sub>2</sub>CH<sub>3</sub>), 50.8 (dm, <sup>3</sup>J<sub>P,C</sub> = 10.2 Hz, NCH<sub>2</sub>CH<sub>2</sub>CH<sub>2</sub>CH<sub>3</sub>), 122.2 (q, <sup>1</sup>J<sub>F,C</sub> = 322.0 Hz, (CF<sub>3</sub>)OTf), 133.8 (d, <sup>2</sup>J<sub>P,C</sub> = 20.5 Hz, *ortho*-C), 130.0 (d, <sup>3</sup>J<sub>P,C</sub> = 7.3 Hz, *meta*-C), 130.3 (d, <sup>3</sup>J<sub>P,C</sub> = 7.5 Hz, *meta*-C), 130.7 (d, <sup>4</sup>J<sub>P,C</sub> = 9.1 Hz, *para*-C), 143.5-143.8 (m, PC), 146.1-146.3 (m, PC), 147.1 (d, <sup>1</sup>J<sub>P,C</sub> = 59.1 Hz, C-PPh<sub>2</sub>). *Despite also analysing the <sup>13</sup>C-<sup>1</sup>H-HSQC/HMBC spectra and without the possibility to record <sup>31</sup>P-<sup>13</sup>C-HSQC/HMBC spectra, due to the signal's low intensity the ipso-C resonance could not be assigned.* <sup>31</sup>P NMR (162.00 MHz, 298.0 K, C<sub>6</sub>D<sub>6</sub>): δ / ppm = -84.3 (m), -25.3 (m). <sup>31</sup>P{<sup>1</sup>H} NMR (162.00 MHz, 298.0 K, C<sub>6</sub>D<sub>6</sub>): δ / ppm = -84.3 (s), -25.3 (s). MS (positive ESI): *m/z* = 436.219 (100) [M-2OTf]<sup>2+</sup>, 394.172 (80) [M-2OTf-1-Hexene]<sup>2+</sup>, 344.198 (60) [M-2OTf-PPh<sub>2</sub>+H]<sup>2+</sup>, 302.151 (51) [M-2OTf-PPh<sub>2</sub>+H-1-Hexene]<sup>2+</sup>, 185.052 (16) [PPh<sub>2</sub>]<sup>+</sup>. MS (negative ESI): *m/z* = 149.0 (100) [OTf]<sup>-</sup>.

## 2.12. Fe(CO)<sub>4</sub>-Bis(NHC) complex 9a

A solution of 0.412 g (0.82 mmol, 1.00 eq.) **5a** in 10 mL toluene was cooled to -80 °C and transferred to a -80 °C cooled suspension of 0.268 g (0.738 mmol, 0.90 eq.) Fe<sub>2</sub>(CO)<sub>9</sub> in 10 mL toluene with additionally 5 mL toluene. After letting warm up to room temperature and stirring for 5 days, the solvent was removed *in vacuo* (5 · 10<sup>-2</sup> mbar). The orange, oily residue was filtered over a bed of silica and celite (d = 2 cm, h = 1 cm each) with 150 mL THF in total and solvent was evaporated. After extraction with three times 10–20 mL *n*-pentane, solvent removal and drying for several hours the complex was obtained as orange solid. Yield: 0.314 g (46 %). Mp: 121 °C (dec.). IR:  $\tilde{\nu}_{max}/\text{cm}^{-1}$  = 2961w and 2932m (*v*<sub>as</sub>(CH<sub>3</sub>), *v*<sub>s</sub>(CH<sub>2</sub>)), 2874m (*v*<sub>s</sub>(CH<sub>3</sub>), *v*<sub>as</sub>(CH<sub>2</sub>)), 2037s (*v*(CO)), 1909vs (*v*(CO)). <sup>1</sup>H NMR (500.04 MHz, 298.0 K, C<sub>6</sub>D<sub>6</sub>): δ / ppm = 0.75 (t, <sup>3</sup>J<sub>H,H</sub> = 6.8 Hz, 6H, CH<sub>3</sub>(Et)) 0.85 (tm, <sup>3</sup>J<sub>H,H</sub> = 7.4 Hz, 12H, CH<sub>3</sub>(*n*-Bu)), 0.89 (m, 2H, PCHCH<sub>2</sub>CH<sub>3</sub>), 0.94-1.00 (m, 4H, P-CHCH<sub>2</sub>CH<sub>3</sub>), 1.21-1.38 (m, 8H, NCH<sub>2</sub>CH<sub>2</sub>CH<sub>2</sub>CH<sub>3</sub>), 1.67-1.84 (m, 8H, NCH<sub>2</sub>CH<sub>2</sub>CH<sub>2</sub>CH<sub>3</sub>), 4.15-4.30 (m, 4H, NCH<sub>2</sub>CH<sub>2</sub>CH<sub>2</sub>CH<sub>3</sub>), 4.38-4.54 (m, 4H, NCH<sub>2</sub>CH<sub>2</sub>CH<sub>2</sub>CH<sub>3</sub>). <sup>13</sup>C{<sup>1</sup>H} NMR (125.75 MHz, 298.0 K, C<sub>6</sub>D<sub>6</sub>): δ / ppm = 13.4 (m, CH<sub>3</sub>(Et)), 13.8 (m, CH<sub>3</sub>(*n*-Bu)), 27.7 (m, PCHCH<sub>2</sub>CH<sub>3</sub>), 20.2 (m, NCH<sub>2</sub>CH<sub>2</sub>CH<sub>2</sub>CH<sub>3</sub>), 34.0 (m, NCH<sub>2</sub>CH<sub>2</sub>CH<sub>2</sub>CH<sub>3</sub>), 45.7 (t, <sup>1</sup>J<sub>P,C</sub> = 6.3, PCHCH<sub>2</sub>CH<sub>3</sub>), 51.0 (m, NCH<sub>2</sub>CH<sub>2</sub>CH<sub>2</sub>CH<sub>3</sub>), 141.0 (dd, *J*<sub>P,C</sub> = 8.0 Hz, *J*<sub>P,C</sub> = 5.3 Hz, P-C), 143.6 (dd, *J*<sub>P,C</sub> = 4.3 Hz, P-C), 187.8 (t, <sup>3</sup>J<sub>P,C</sub> = 2.7 Hz, C<sup>2</sup>), 218.7 (s, CO). <sup>31</sup>P NMR (202.44 MHz, 298.0 K, C<sub>6</sub>D<sub>6</sub>): δ / ppm = -82.2. <sup>31</sup>P{<sup>1</sup>H} NMR (202.44 MHz, 298.0 K, C<sub>6</sub>D<sub>6</sub>): δ / ppm = -82.2 (s). MS (positive ESI): *m/z* = 671.255 (100) [M-Fe(CO)<sub>4</sub>+H]<sup>+</sup>, 643.261 (6) [M-Fe(CO)<sub>4</sub>-CO+H]<sup>+</sup>, 587.162 (2) [M-Fe(CO)<sub>4</sub>-hexene+H]<sup>2</sup>. HR-MS (ESI(+)): found: 671.2575. Calc. for [C<sub>32</sub>H<sub>48</sub>FeN<sub>4</sub>O<sub>4</sub>P<sub>2</sub>H]<sup>+</sup> 671.2577.

## 2.13. Attempted synthesis of tri-/tetranuclear Fe(CO)<sub>4</sub>-Bis(NHC) complex

In a Schlenk tube 0.015 g (0.03 mmol, 1.00 eq.) **5a** and 0.025 g (0.07 mmol, 2.3 eq.) Fe<sub>2</sub>(CO)<sub>9</sub> were suspended in 1.5 mL toluene and stirred at ambient temperature. <sup>31</sup>P{<sup>1</sup>H} NMR monitoring after three days and 20 days showed the same spectrum with approximately 40 % conversion to a trinuclear complex. <sup>31</sup>P{<sup>1</sup>H} NMR (121.51 MHz, 298.0 K): δ / ppm = -91.7 (d, <sup>3</sup>J<sub>P,P</sub> = 9 Hz, PCH<sub>2</sub>), 45.1 (br m, PCH<sub>2</sub>Fe(CO)<sub>4</sub>).

## 2.14. Bis(NHC) 5c via trapping reaction of 11

In a *J Young*® NMR tube 0.007 g (0.01 mmol, 1.0 eq.) **5a** were dissolved in 0.45 mL (2.85 mmol, 285 eq.) 1-octene and heated to 120 °C. After 2 h the <sup>31</sup>P{<sup>1</sup>H} NMR spectrum showed complete conversion.

$^{31}\text{P}\{^1\text{H}\}$  NMR (121.51 MHz, 298.0 K):  $\delta$  / ppm = -91.8 (d,  $^3J_{\text{P,P}} = 20.1$  Hz,  $\text{PCH}_2$ ), -86.1 (d,  $^3J_{\text{P,P}} = 20.1$  Hz,  $\text{PCH}$ ).

### 2.15. $\text{Fe}(\text{CO})_4$ -Bis(NHC) complex 9c via trapping reaction of 12

In a *J Young*<sup>®</sup> NMR tube 0.01 g (0.01 mmol, 1.0 eq.) **9a** were dissolved in 0.45 mL (2.85 mmol, 285 eq.) 1-octene and heated to 100 °C. After 5 h the  $^{31}\text{P}\{^1\text{H}\}$  NMR spectrum showed complete conversion.  $^{31}\text{P}\{^1\text{H}\}$  NMR (121.51 MHz, 298.0 K):  $\delta$  / ppm = -89.1 (d,  $^3J_{\text{P,P}} = 18.2$  Hz,  $\text{PCH}_2$ ), -83.7 (d,  $^3J_{\text{P,P}} = 18.2$  Hz,  $\text{PCH}$ ).

### 3. NMR and UV/vis spectra

Impurities (solvent peaks, grease peaks) are marked with \* in the spectra.

#### 3.1. 1,4-Diphosphabarrelene 2a

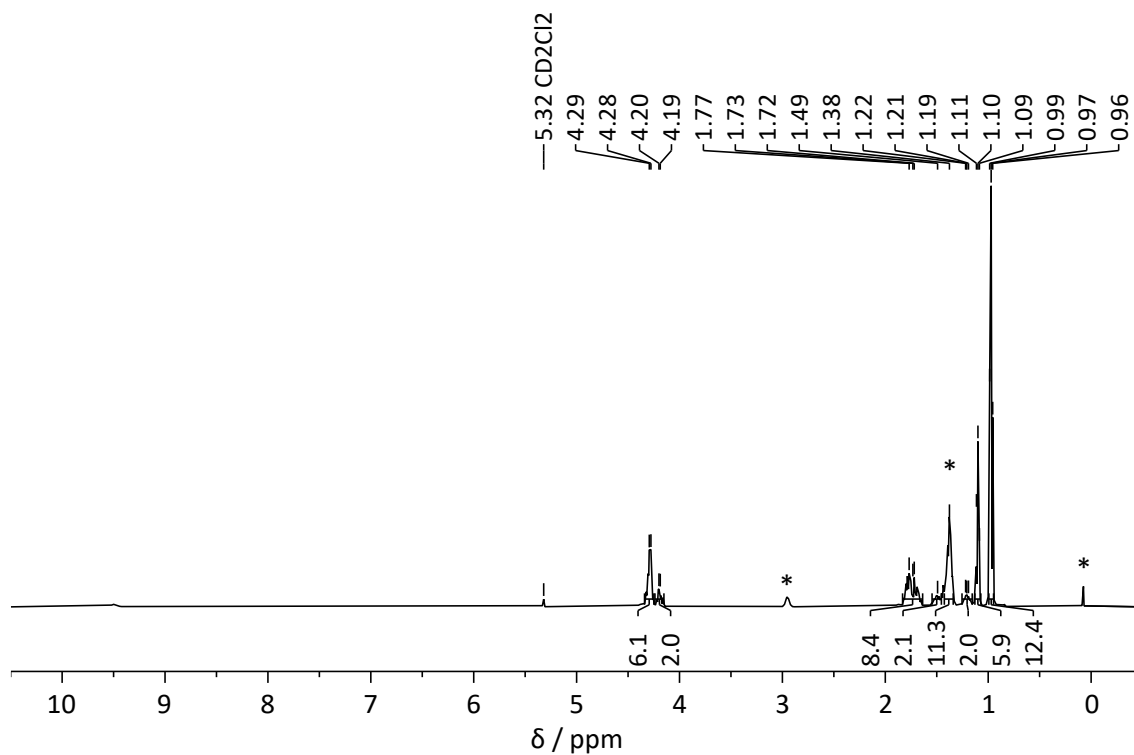

Figure S1 <sup>1</sup>H NMR spectrum (CD<sub>2</sub>Cl<sub>2</sub>, 500.04 Hz, 298.0 K) of 2a.

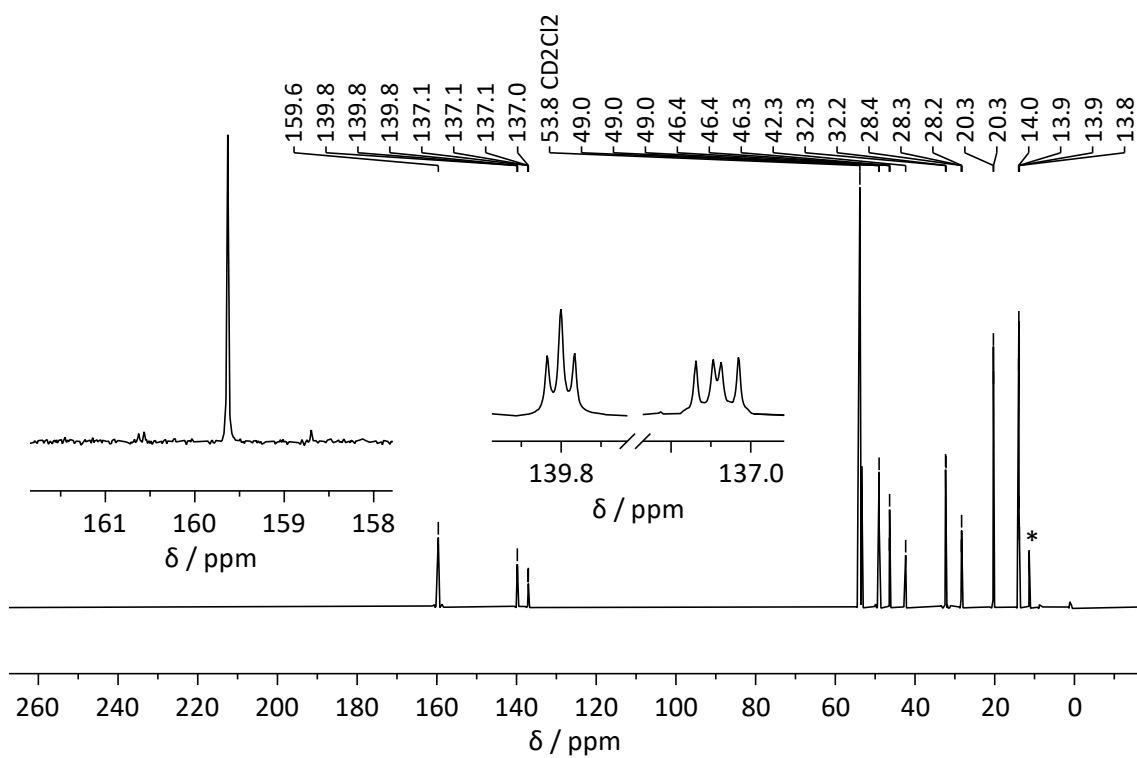

**Figure S2**  $^{13}\text{C}\{^1\text{H}\}$  NMR spectrum ( $\text{CD}_2\text{Cl}_2$ , 125.75 Hz, 298.0 K) of **2a**.

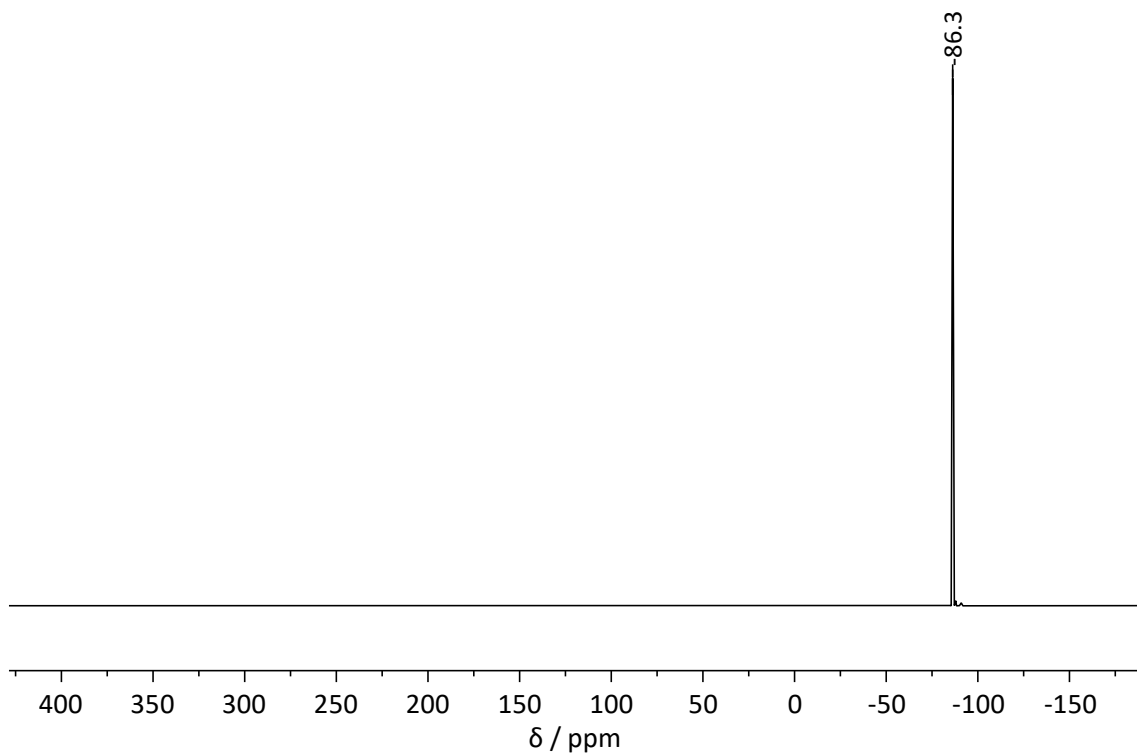

**Figure S3**  $^{31}\text{P}\{^1\text{H}\}$  NMR spectrum ( $\text{CD}_2\text{Cl}_2$ , 202.44 Hz, 298.0 K) of **2a**.

### 3.2. 1,4-Diphosphabarrelene 2b

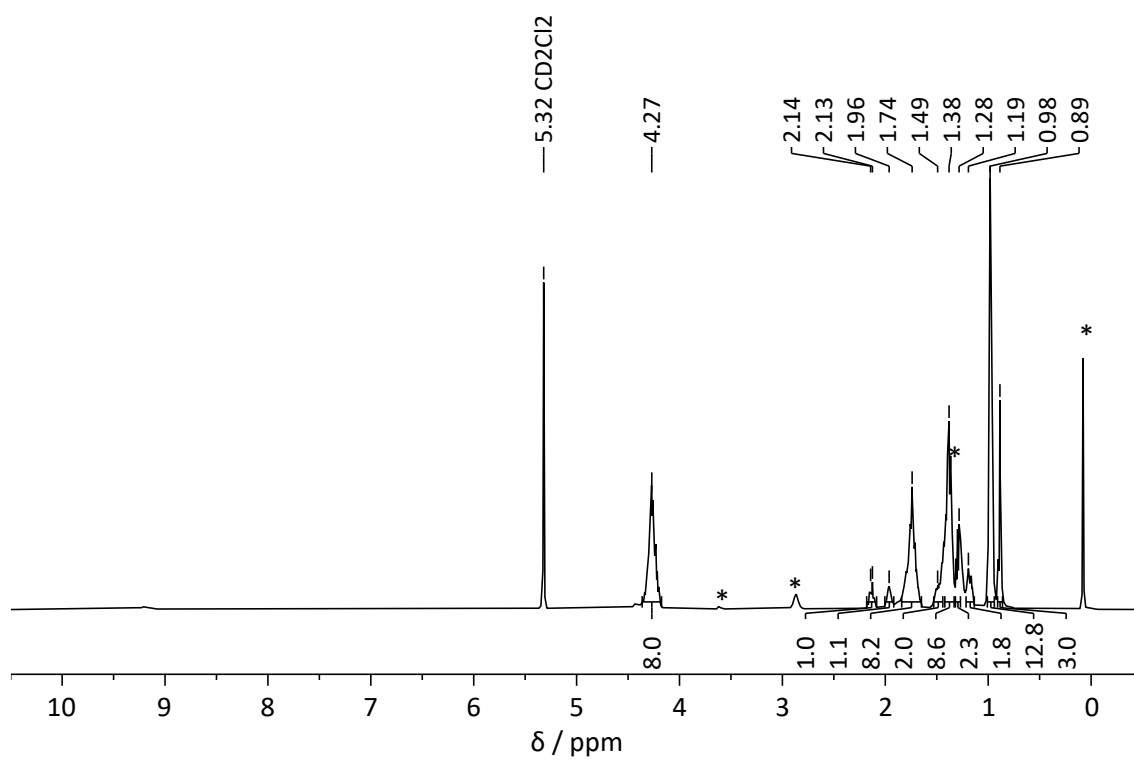

Figure S4 <sup>1</sup>H NMR spectrum (CD<sub>2</sub>Cl<sub>2</sub>, 500.04 Hz, 298.0 K) of **2b**.

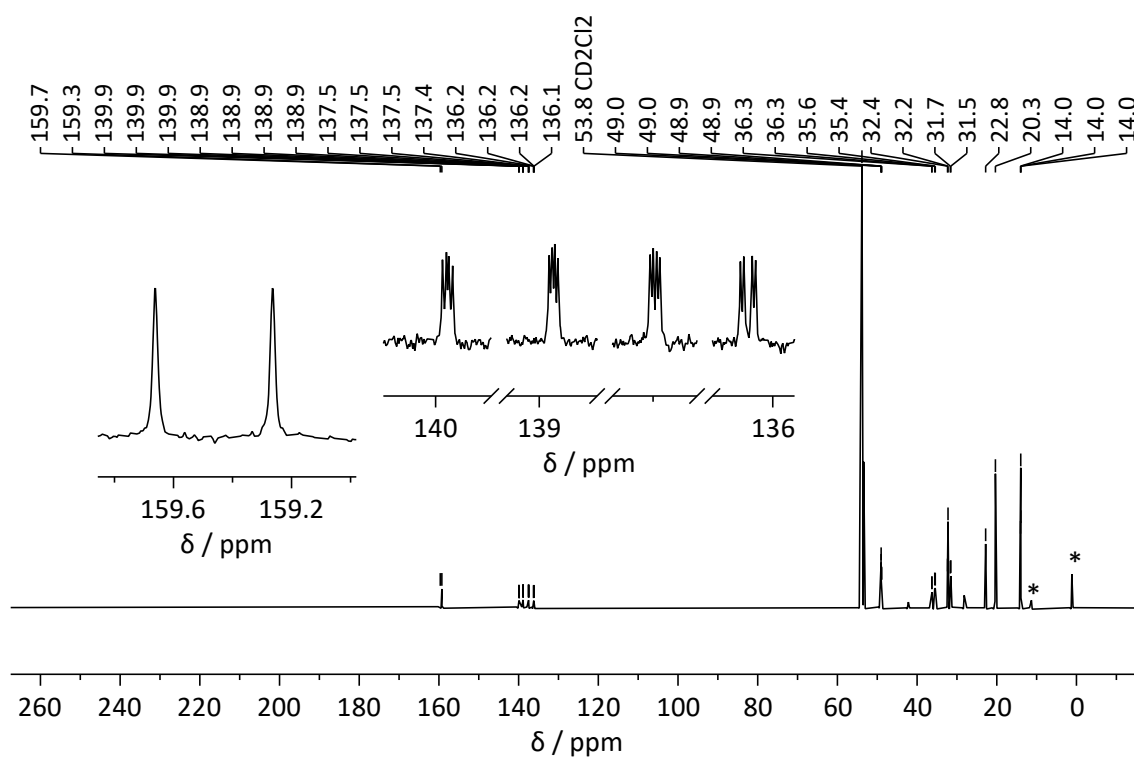

Figure S5 <sup>13</sup>C{<sup>1</sup>H} NMR spectrum (CD<sub>2</sub>Cl<sub>2</sub>, 125.75 Hz, 298.0 K) of **2b**.

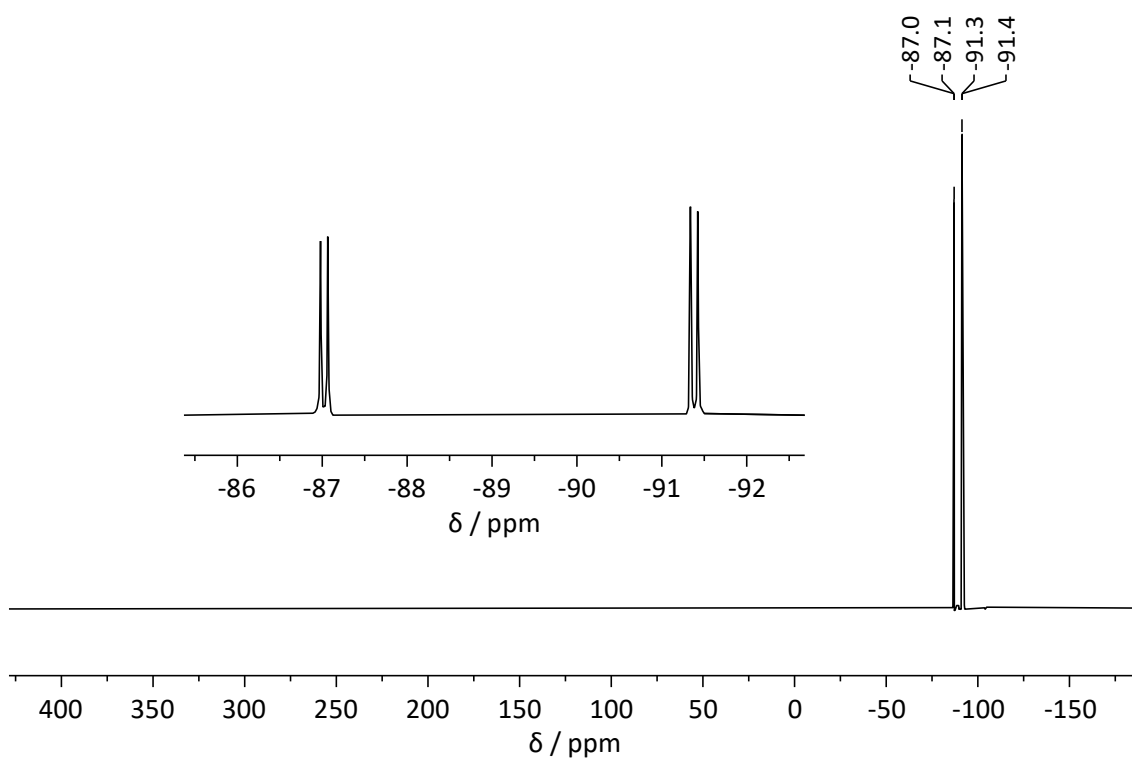

Figure S6  $^{31}\text{P}\{^1\text{H}\}$  NMR spectrum ( $\text{CD}_2\text{Cl}_2$ , 202.44 Hz, 298.0 K) of **2b**.

### 3.3. Se-methylated imidazolium salt **3a**

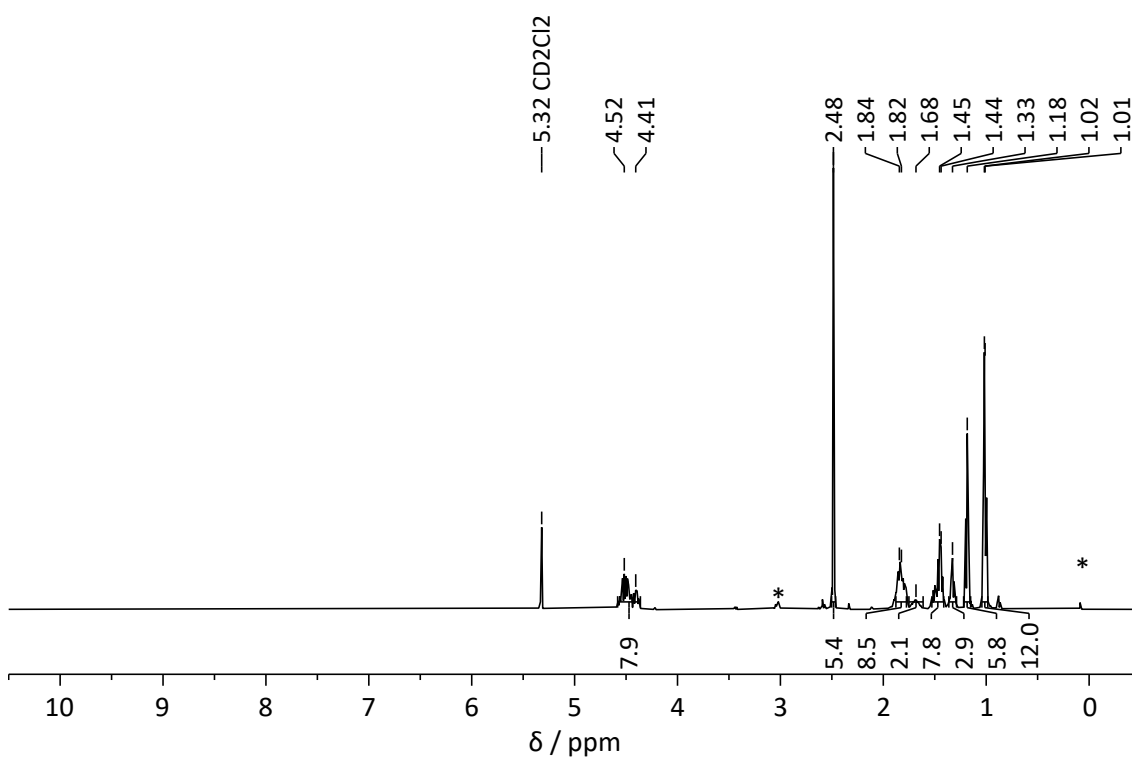

Figure S7  $^1\text{H}$  NMR spectrum ( $\text{CD}_2\text{Cl}_2$ , 500.04 Hz, 298.0 K) of **3a**.



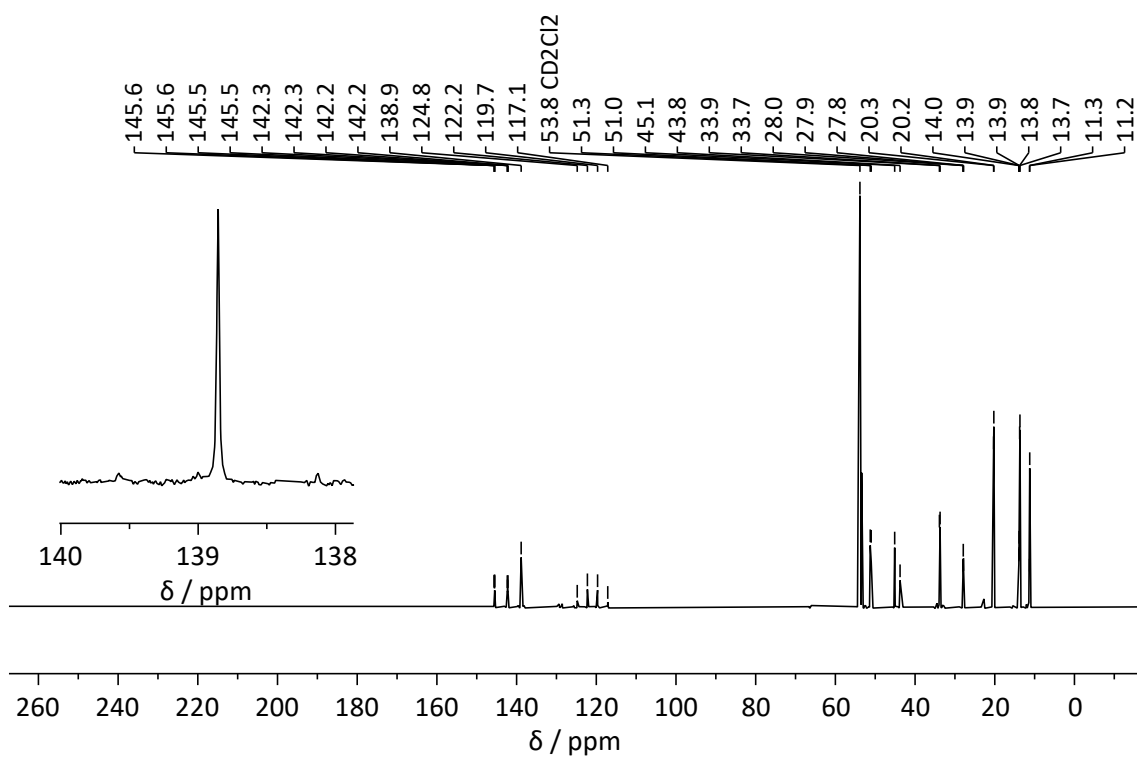

**Figure S8**  $^{13}\text{C}\{^1\text{H}\}$  NMR spectrum ( $\text{CD}_2\text{Cl}_2$ , 125.75 Hz, 298.0 K) of **3a**.

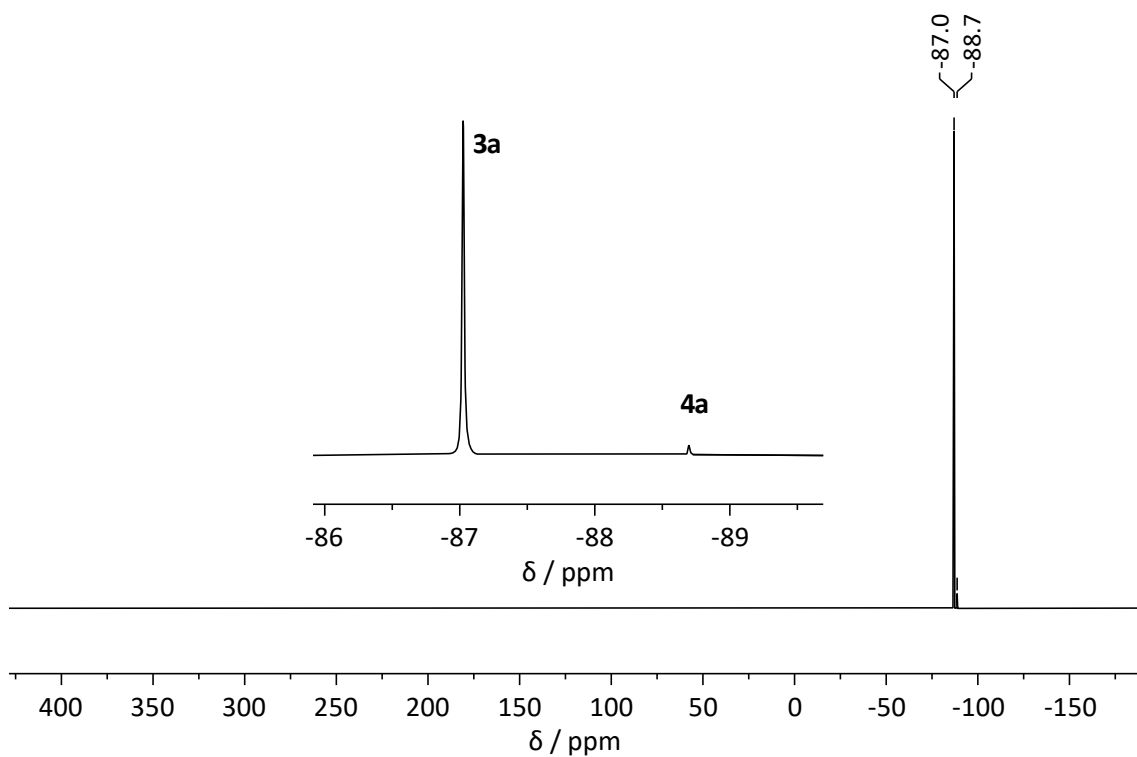

**Figure S9**  $^{31}\text{P}\{^1\text{H}\}$  NMR spectrum ( $\text{CD}_2\text{Cl}_2$ , 202.44 Hz, 298.0 K) of **3a** (with impurity of **4a**).

### 3.4. Se-methylated imidazolium salt **3b**

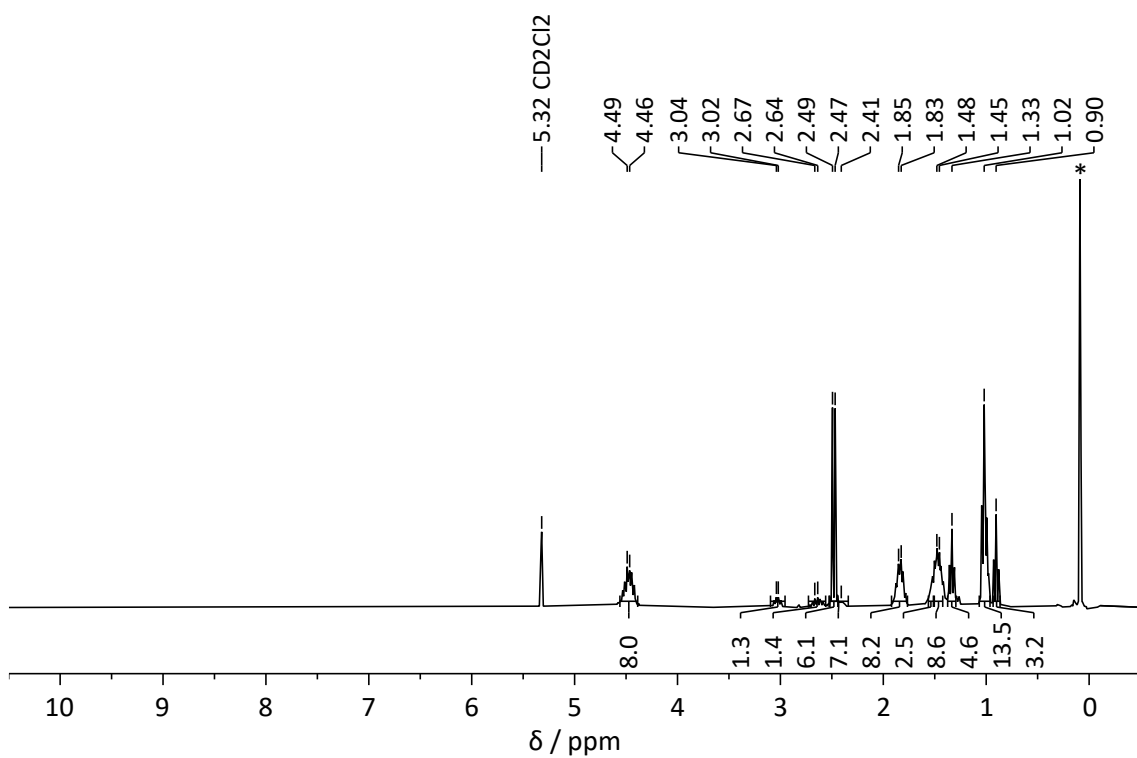

Figure S10 <sup>1</sup>H NMR spectrum (CD<sub>2</sub>Cl<sub>2</sub>, 300.13 Hz, 298.5 K) of **3b**.

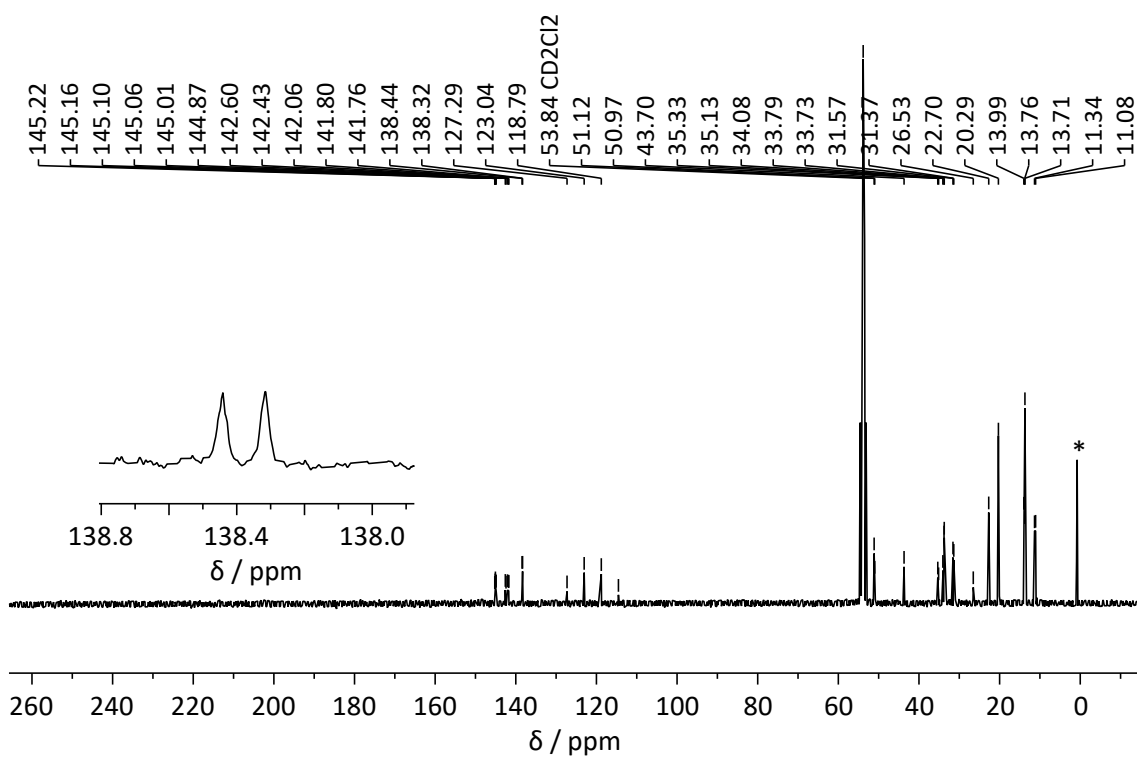

Figure S11 <sup>13</sup>C{<sup>1</sup>H} NMR spectrum (CD<sub>2</sub>Cl<sub>2</sub>, 75.48 Hz, 298.7 K) of **3b**.

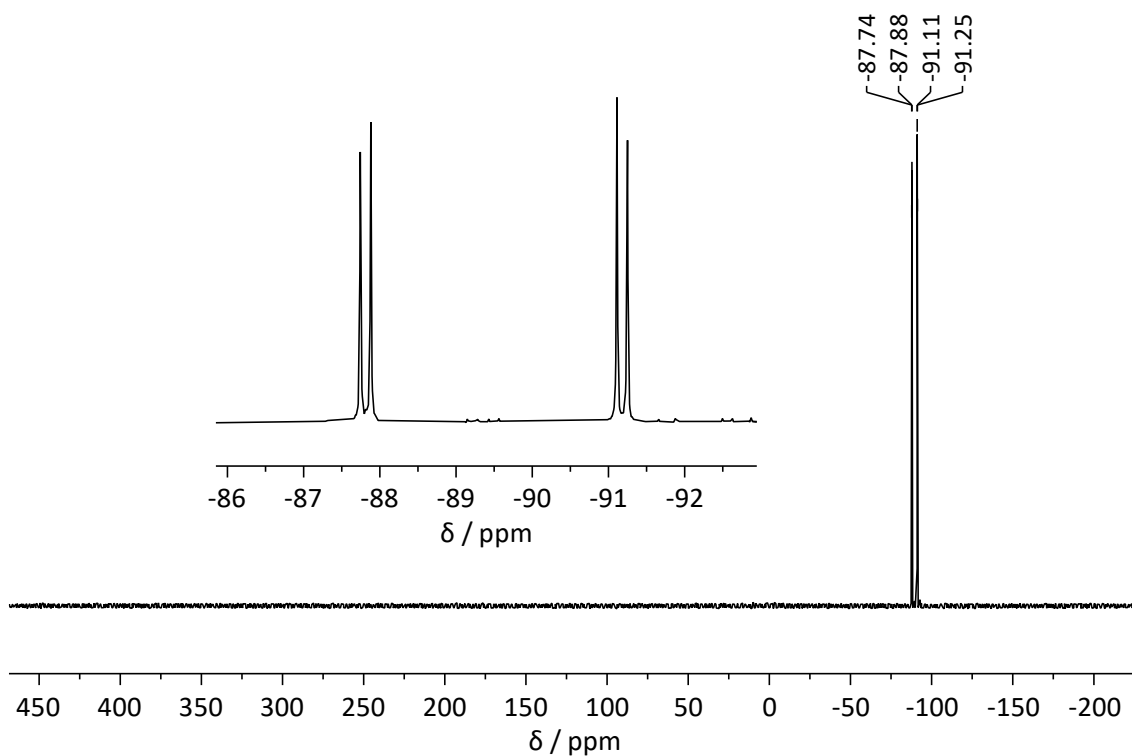

Figure S12  $^{31}\text{P}\{^1\text{H}\}$  NMR spectrum ( $\text{CD}_2\text{Cl}_2$ , 121.51 Hz, 298.5 K) of **3b**.

### 3.5. Imidazolium salt **4a**

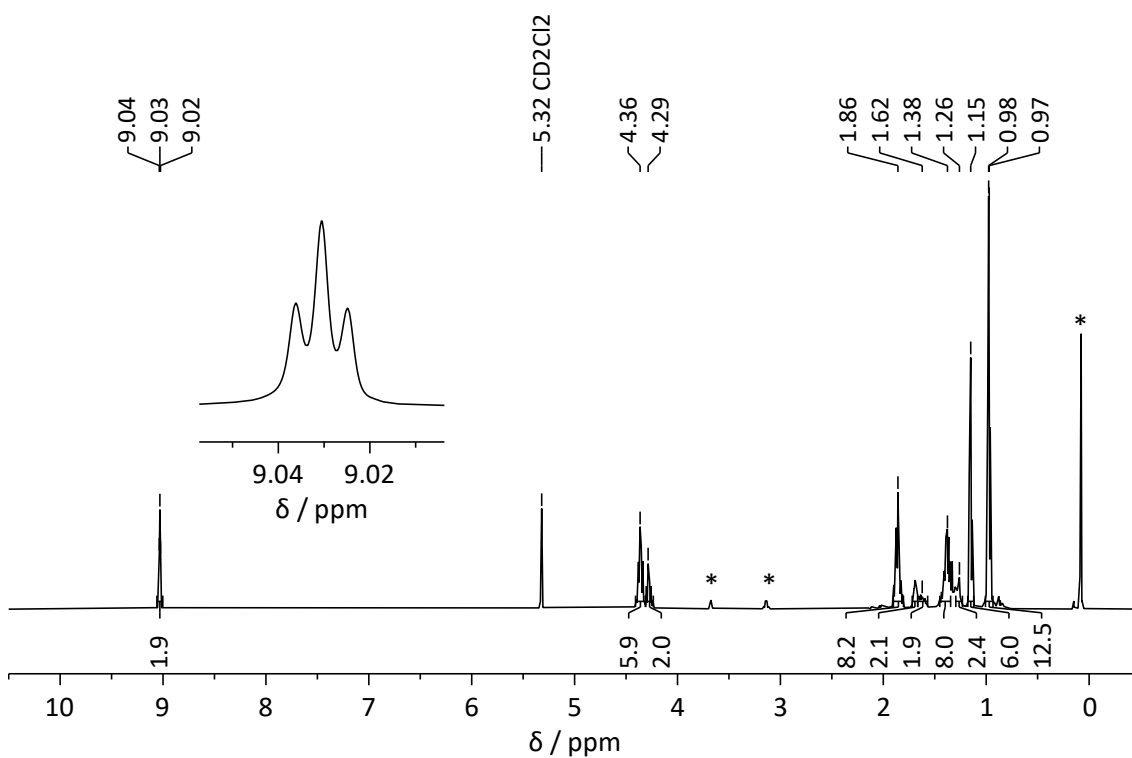

Figure 13  $^1\text{H}$  NMR spectrum ( $\text{CD}_2\text{Cl}_2$ , 500.04 Hz, 298.0 K) of **4a**.

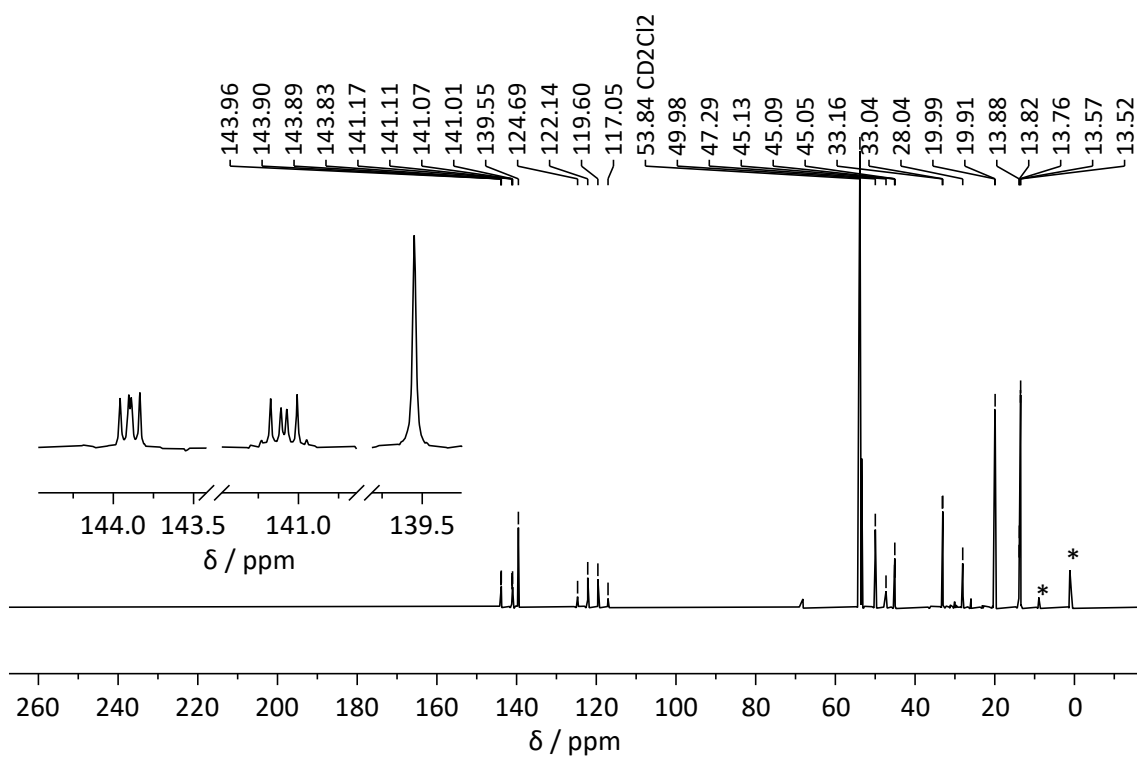

**Figure S14**  $^{13}\text{C}\{^1\text{H}\}$  NMR spectrum ( $\text{CD}_2\text{Cl}_2$ , 125.75 Hz, 298.0 K) of **4a**.

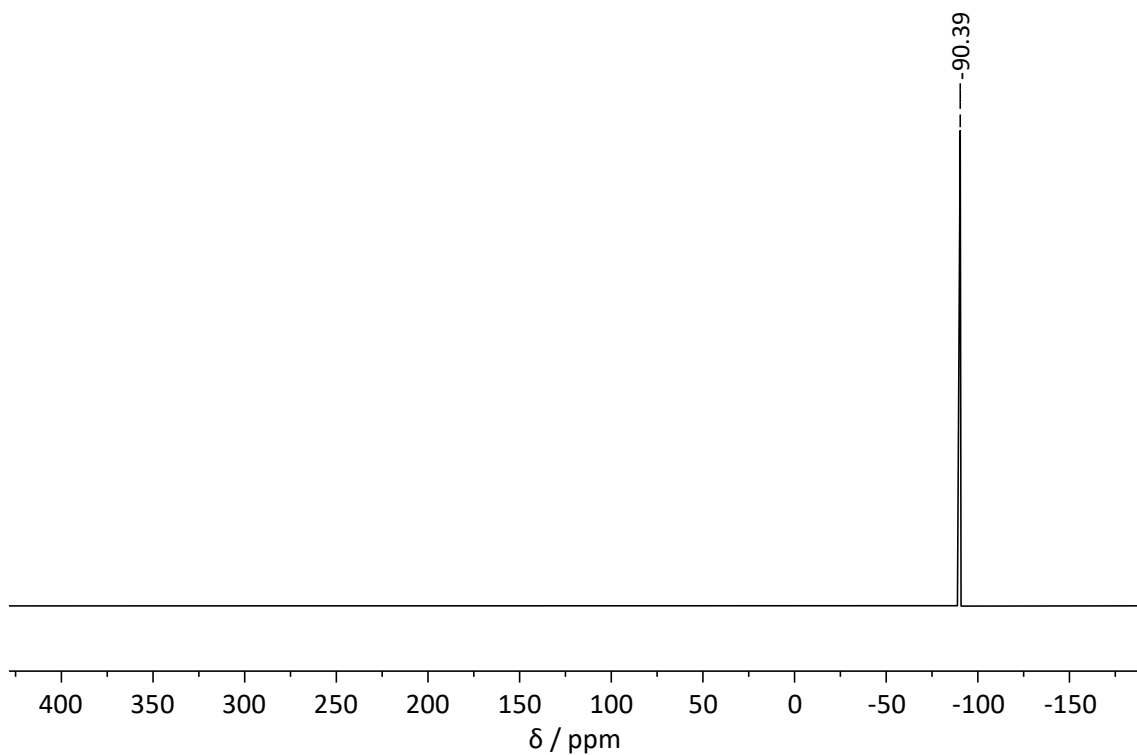

**Figure S15**  $^{31}\text{P}\{^1\text{H}\}$  NMR spectrum ( $\text{CD}_2\text{Cl}_2$ , 202.44 Hz, 298.0 K) of **4a**.

### 3.6. Imidazolium salt **4b**

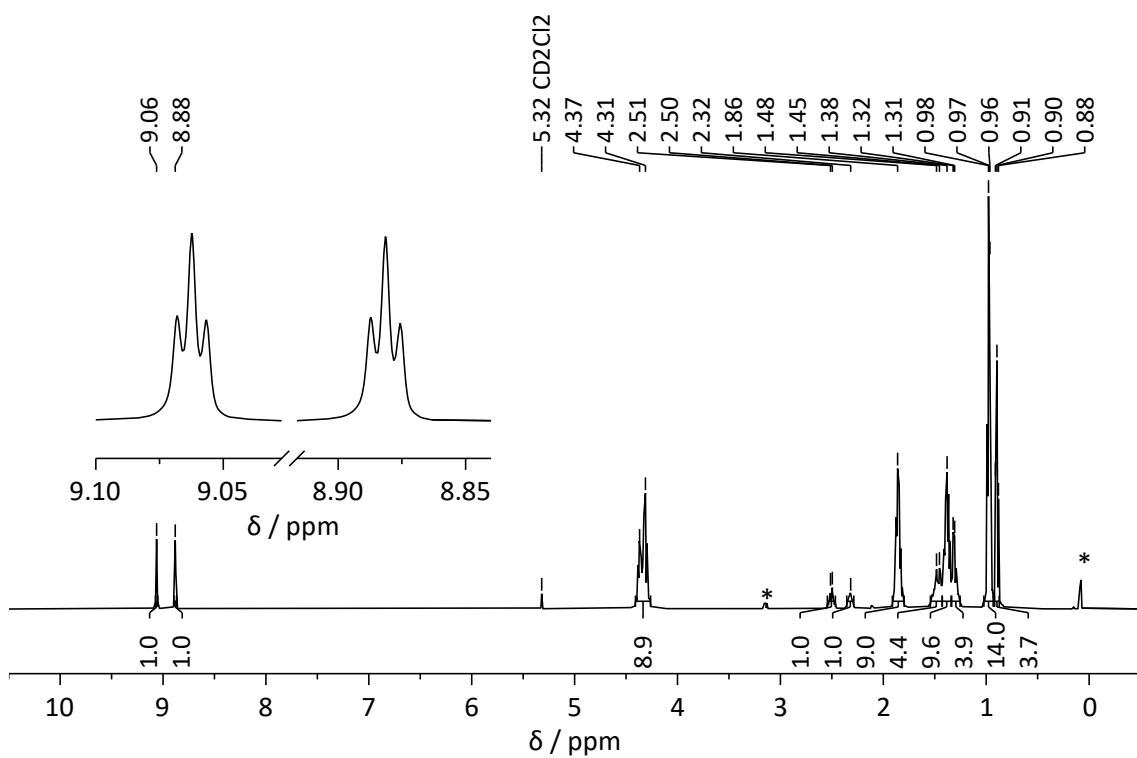

Figure S16 <sup>1</sup>H NMR spectrum (CD<sub>2</sub>Cl<sub>2</sub>, 500.04 Hz, 298.0 K) of **4b**.

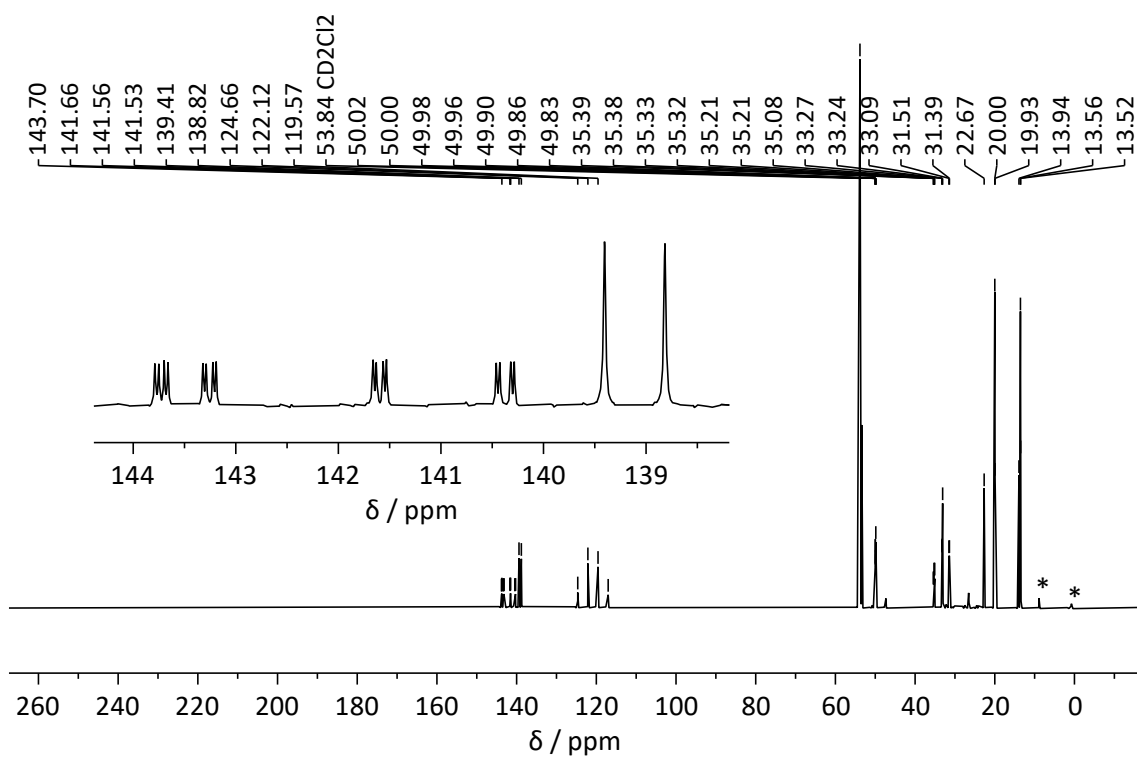

Figure S17 <sup>13</sup>C{<sup>1</sup>H} NMR spectrum (CD<sub>2</sub>Cl<sub>2</sub>, 125.75 Hz, 298.0 K) of **4b**.

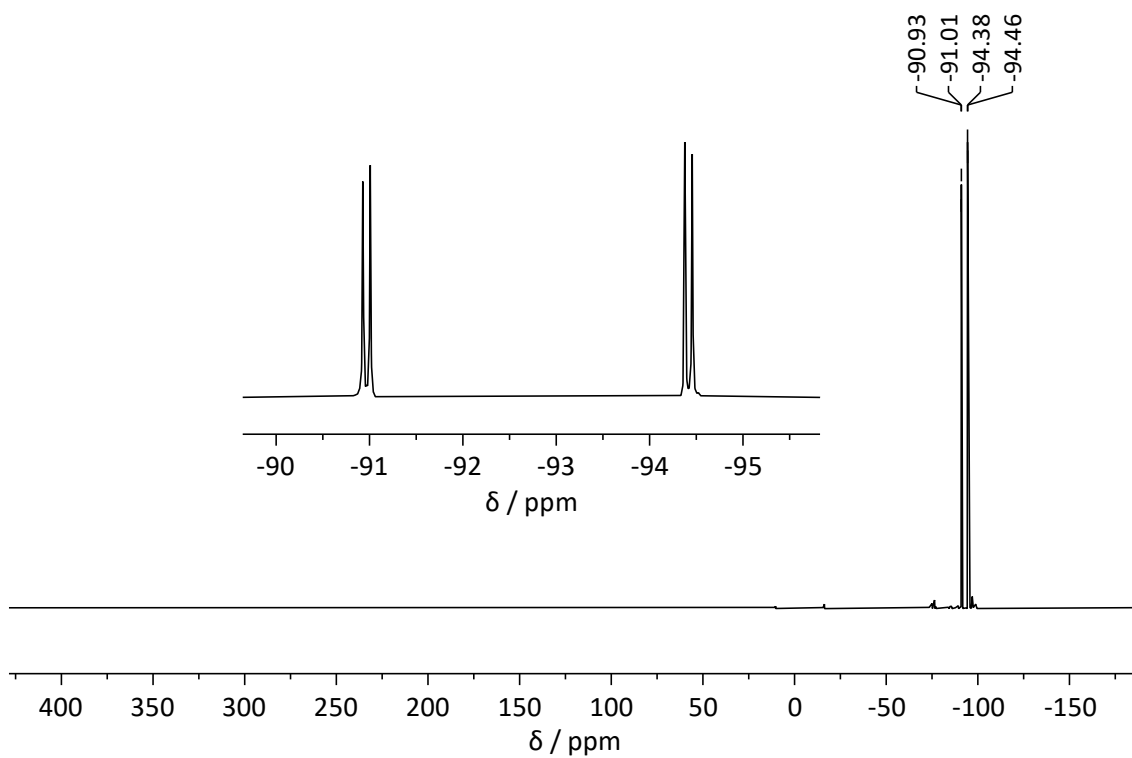

**Figure S18**  $^{31}\text{P}\{^1\text{H}\}$  NMR spectrum ( $\text{CD}_2\text{Cl}_2$ , 202.44 Hz, 298.0 K) of **4b**.

### 3.7. Bis(NHC) **5a**

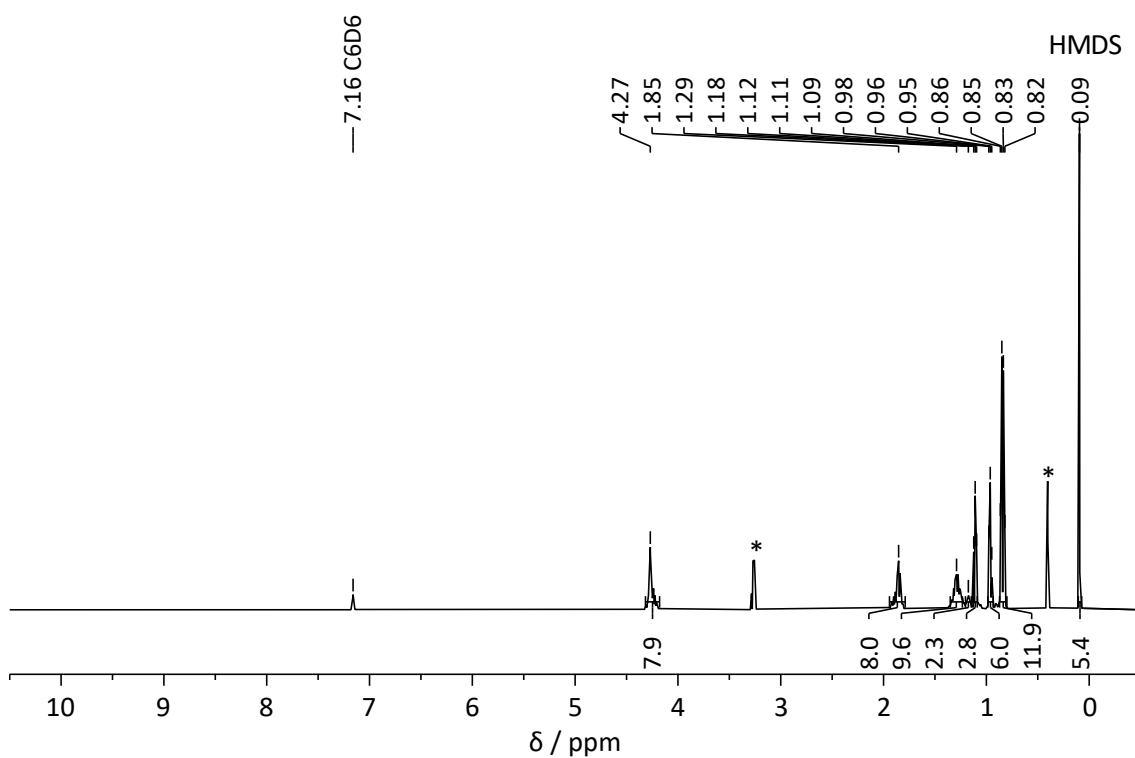

**Figure S19**  $^1\text{H}$  NMR spectrum ( $\text{C}_6\text{D}_6$ , 500.04 Hz, 298.0 K) of **5a**.

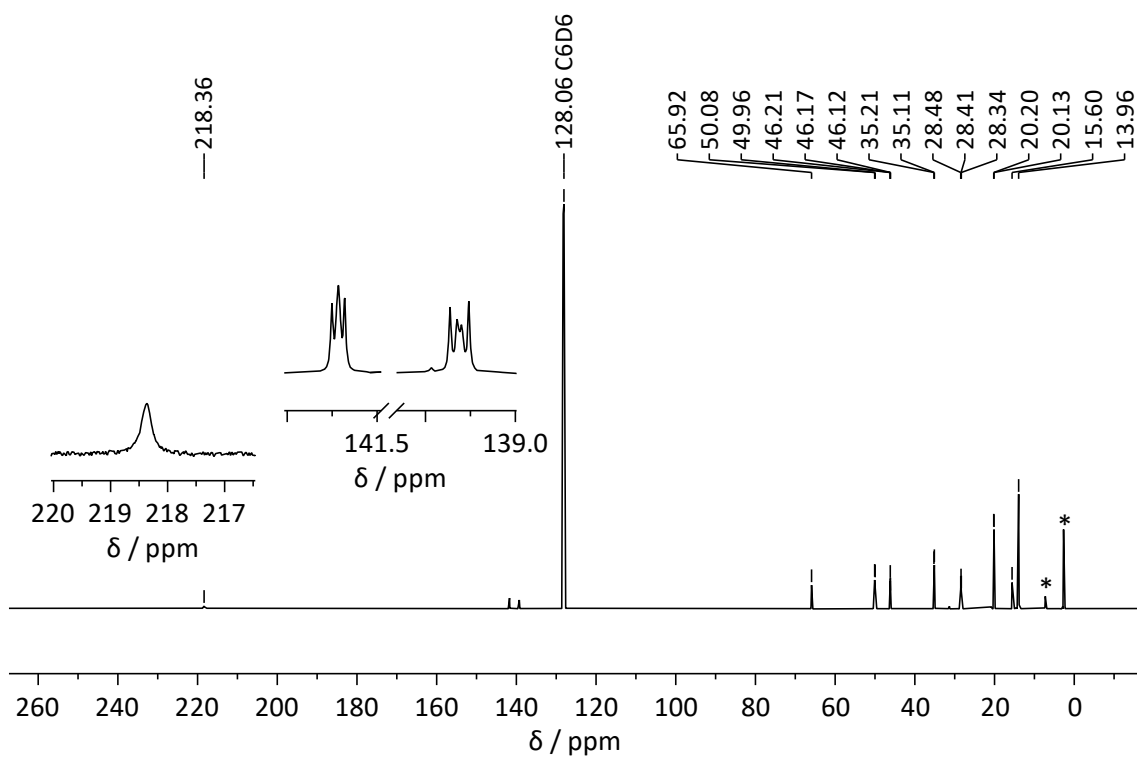

**Figure S20**  $^{13}\text{C}\{^1\text{H}\}$  NMR spectrum ( $\text{C}_6\text{D}_6$ , 125.75 Hz, 298.0 K) of **5a**.

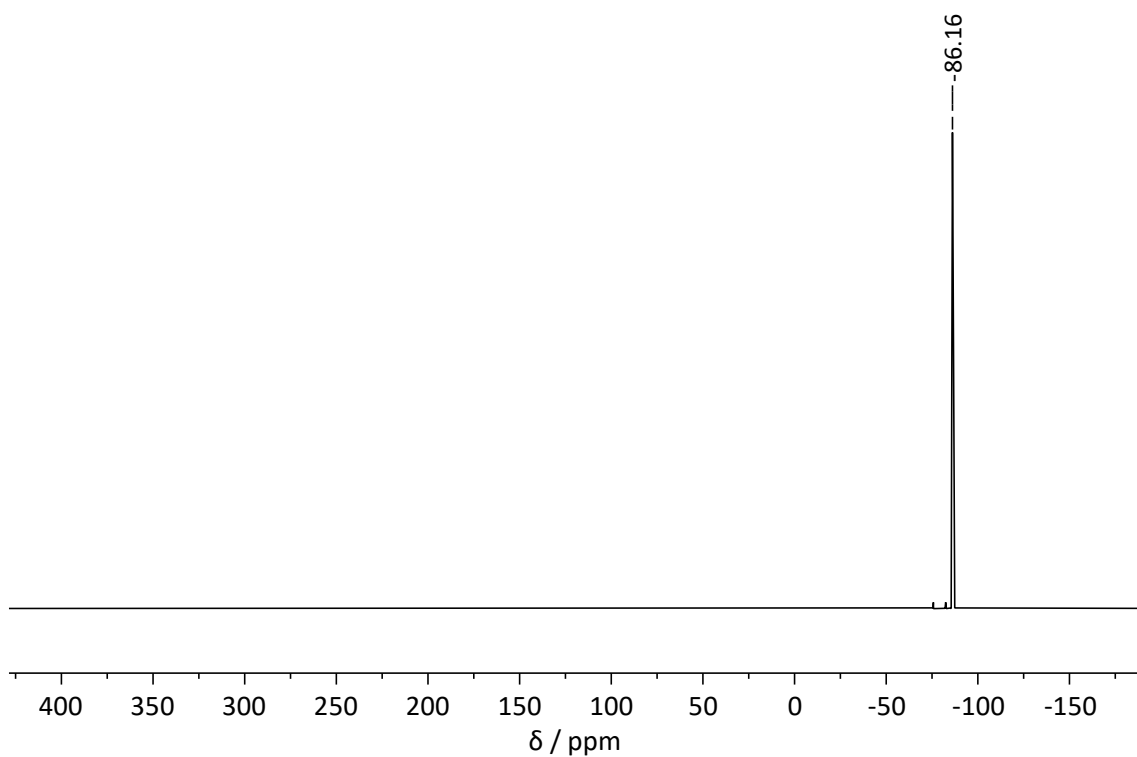

**Figure S21**  $^{31}\text{P}\{^1\text{H}\}$  NMR spectrum ( $\text{C}_6\text{D}_6$ , 202.44 Hz, 298.0 K) of **5a**.

### 3.8. Bis(NHC) **5b**

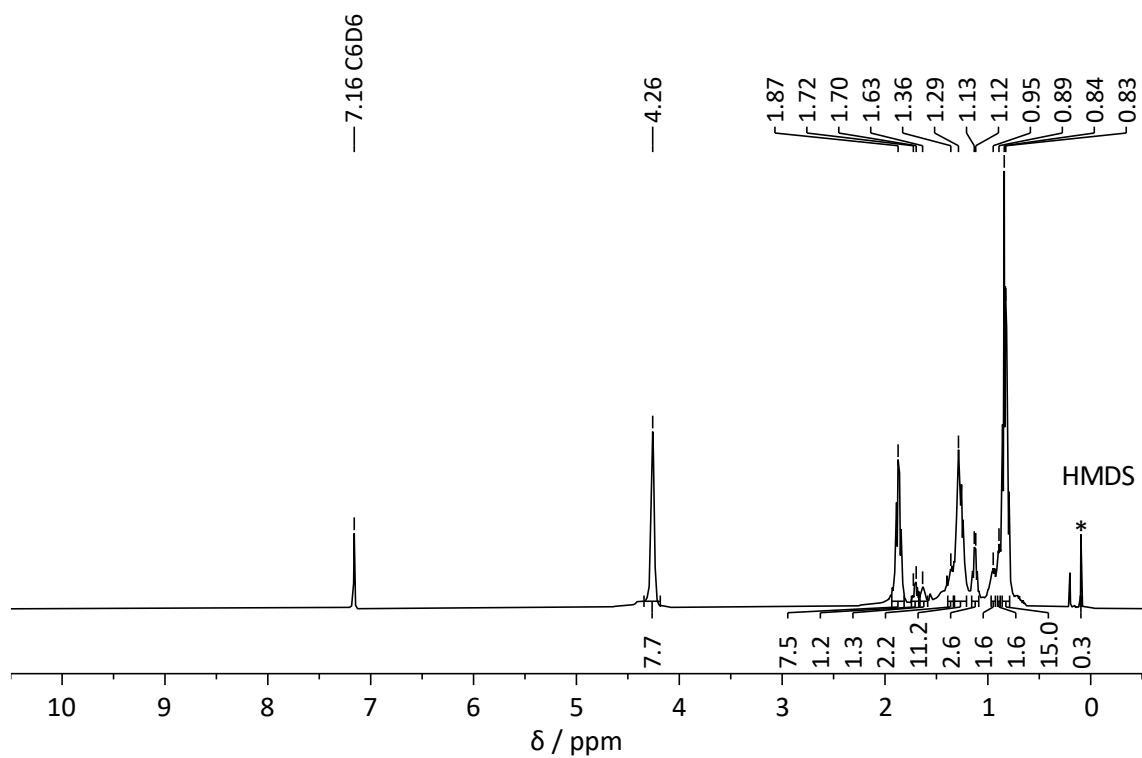

Figure S22  $^1\text{H}$  NMR spectrum ( $\text{C}_6\text{D}_6$ , 500.04 Hz, 298.0 K) of **5b**.

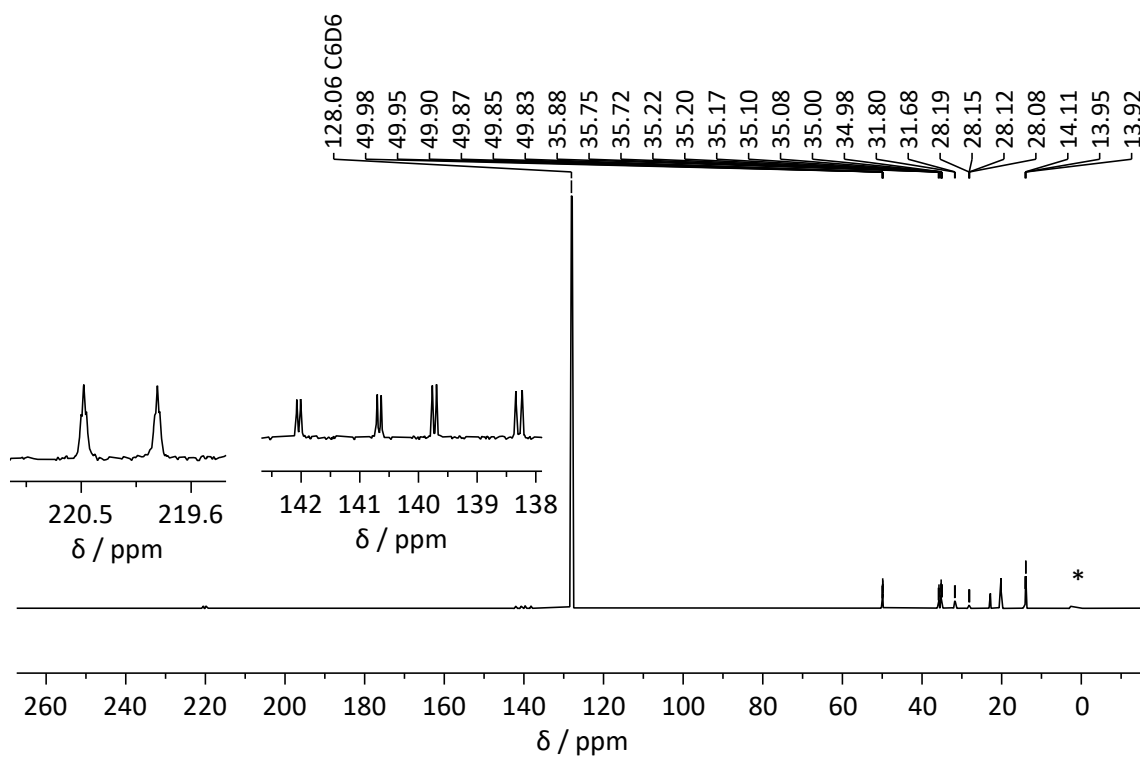

Figure S23  $^{13}\text{C}\{^1\text{H}\}$  NMR spectrum ( $\text{C}_6\text{D}_6$ , 125.75 Hz, 298.0 K) of **5b**.



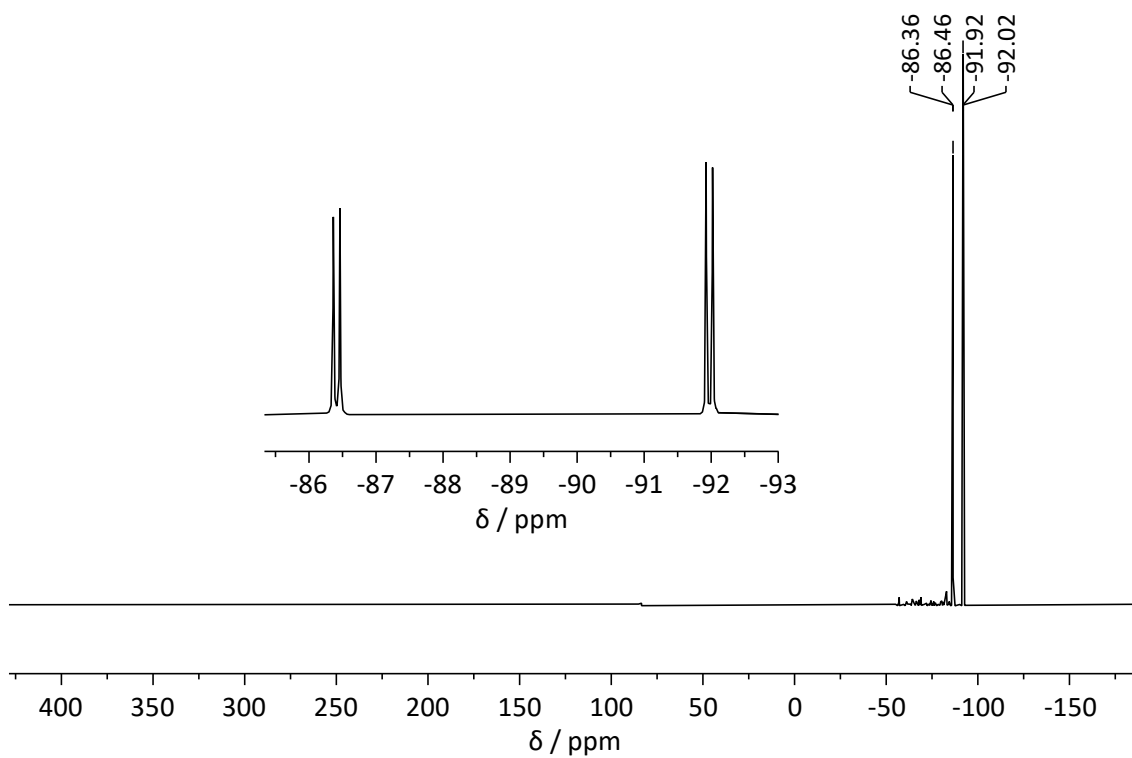

Figure S24  $^{31}\text{P}\{^1\text{H}\}$  NMR spectrum ( $\text{C}_6\text{D}_6$ , 202.44 Hz, 298.0 K) of **5b**.

### 3.9. $\text{BCl}_3$ -Bis(NHC) adduct **6a**

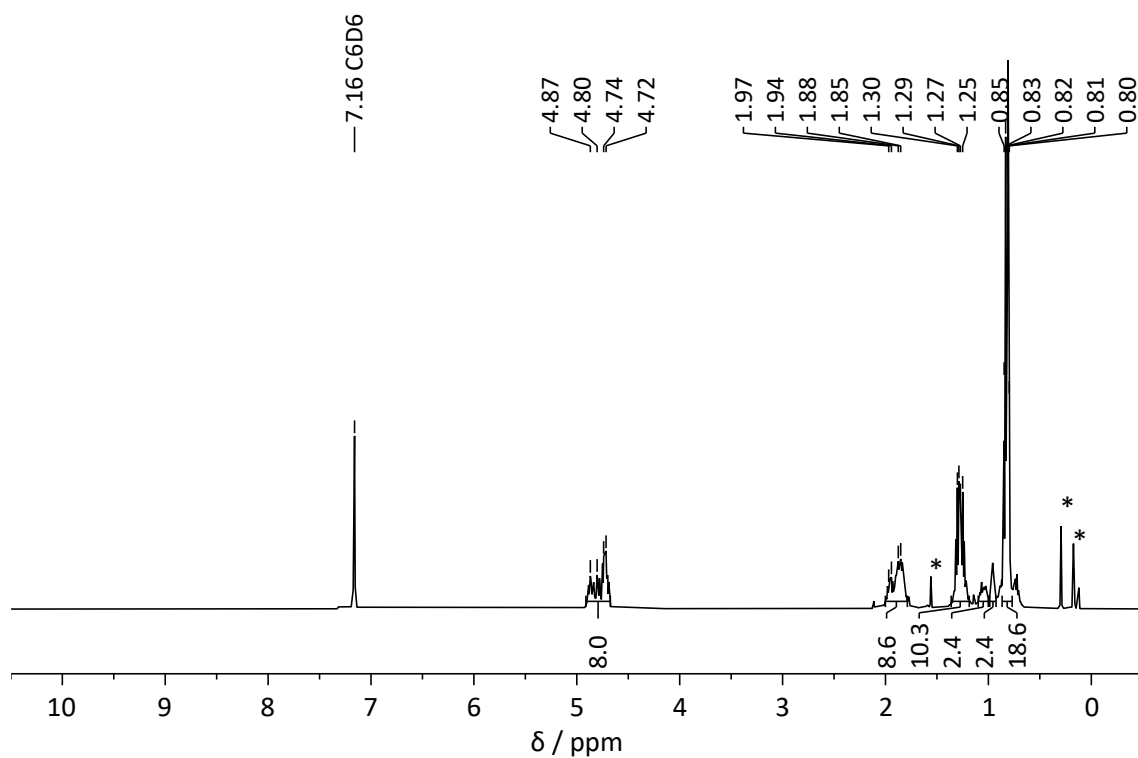

Figure S25  $^1\text{H}$  NMR spectrum ( $\text{C}_6\text{D}_6$ , 499.13 Hz, 297.9 K) of **6a**.

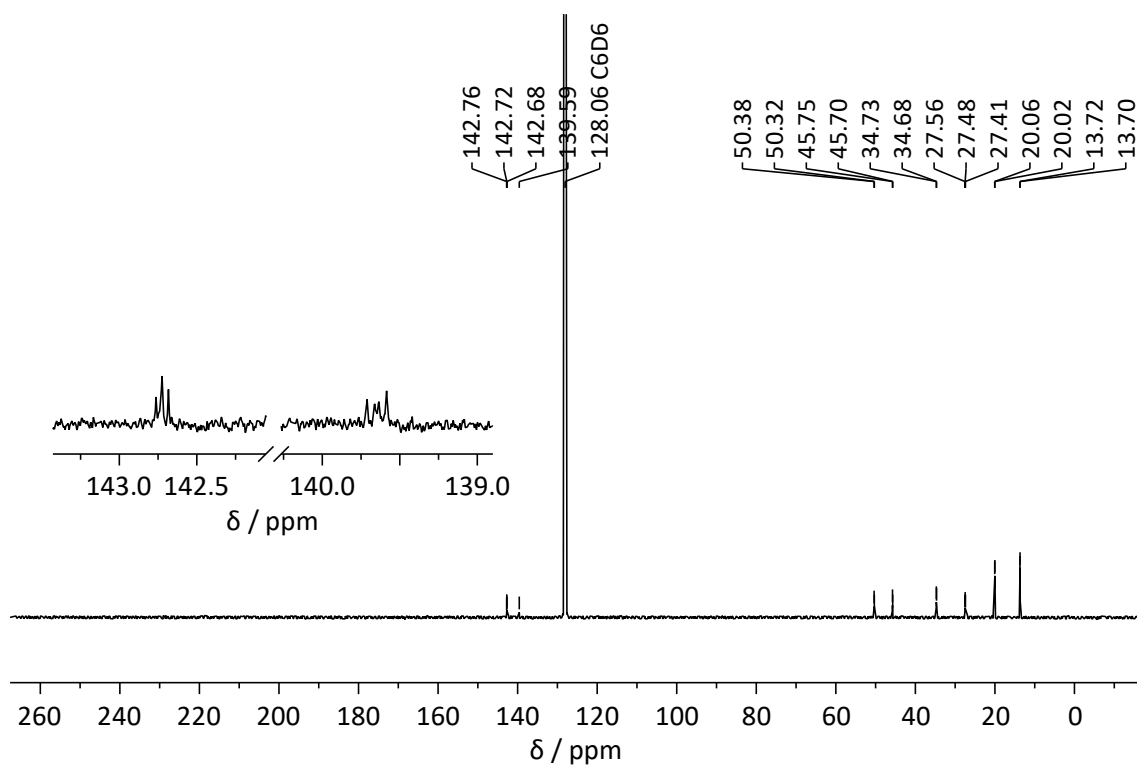

Figure S26  $^{13}\text{C}\{^1\text{H}\}$  NMR spectrum ( $\text{C}_6\text{D}_6$ , 125.52 Hz, 298.0 K) of **6a**.

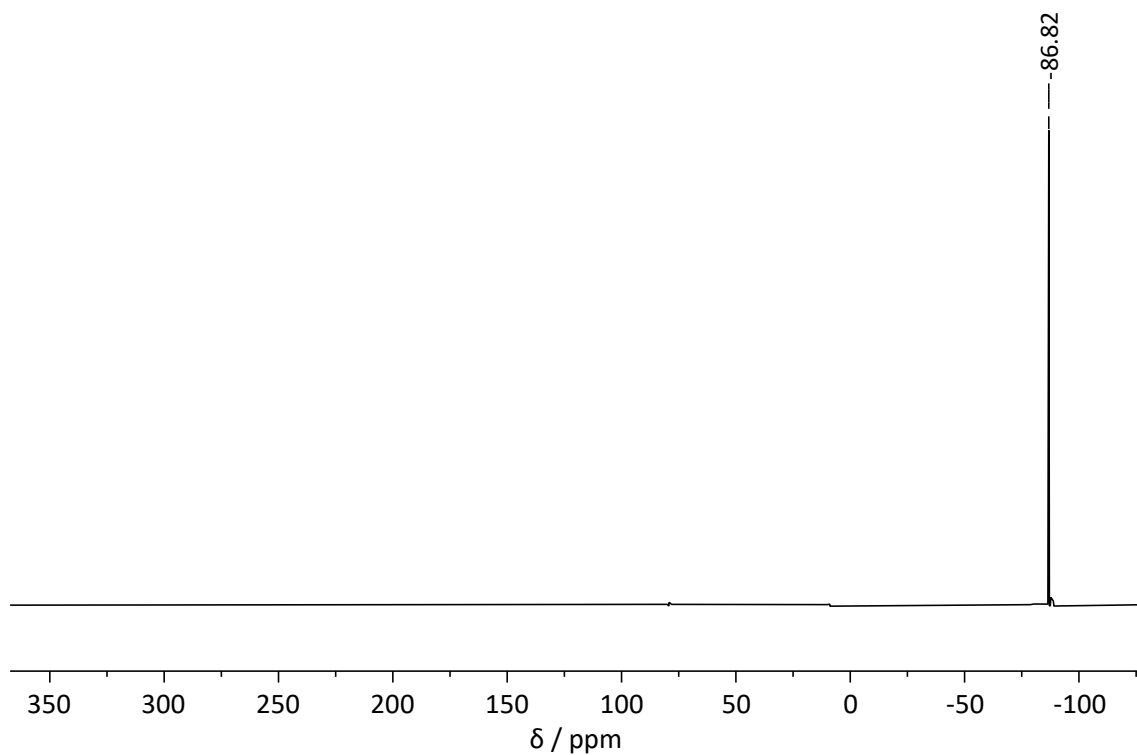

Figure S27  $^{31}\text{P}\{^1\text{H}\}$  NMR spectrum ( $\text{C}_6\text{D}_6$ , 202.08 Hz, 297.8 K) of **6a**.

### 3.10. $\text{CS}_2$ -Bis(NHC) adduct **7a**

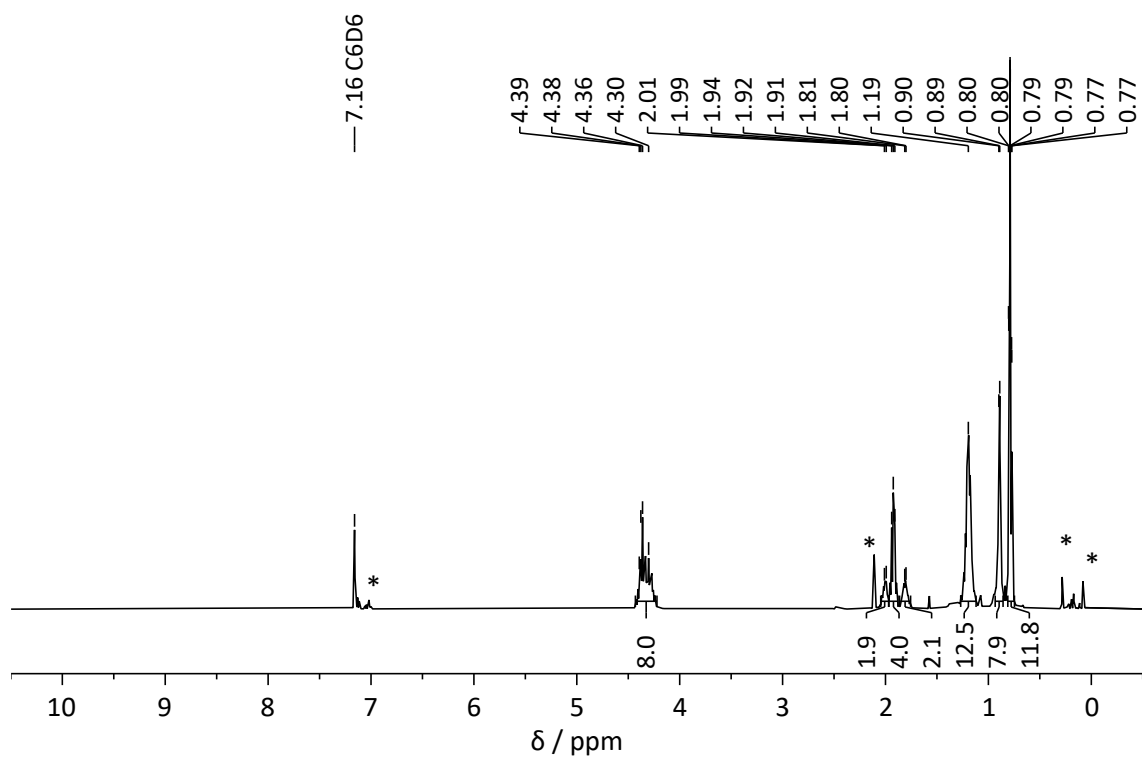

Figure S28  $^1\text{H}$  NMR spectrum ( $\text{C}_6\text{D}_6$ , 499.96 Hz, 298.0 K) of **7a**.

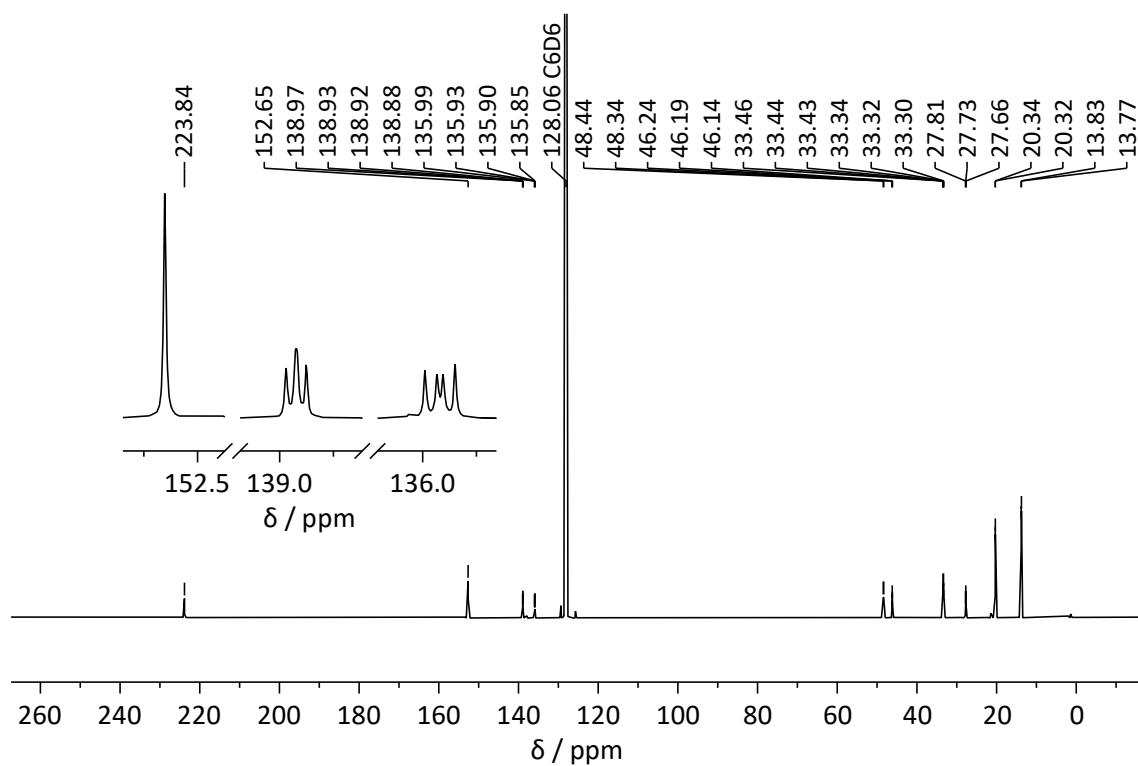

Figure S29  $^{13}\text{C}\{^1\text{H}\}$  NMR spectrum ( $\text{C}_6\text{D}_6$ , 125.73 Hz, 298.0 K) of **7a**.

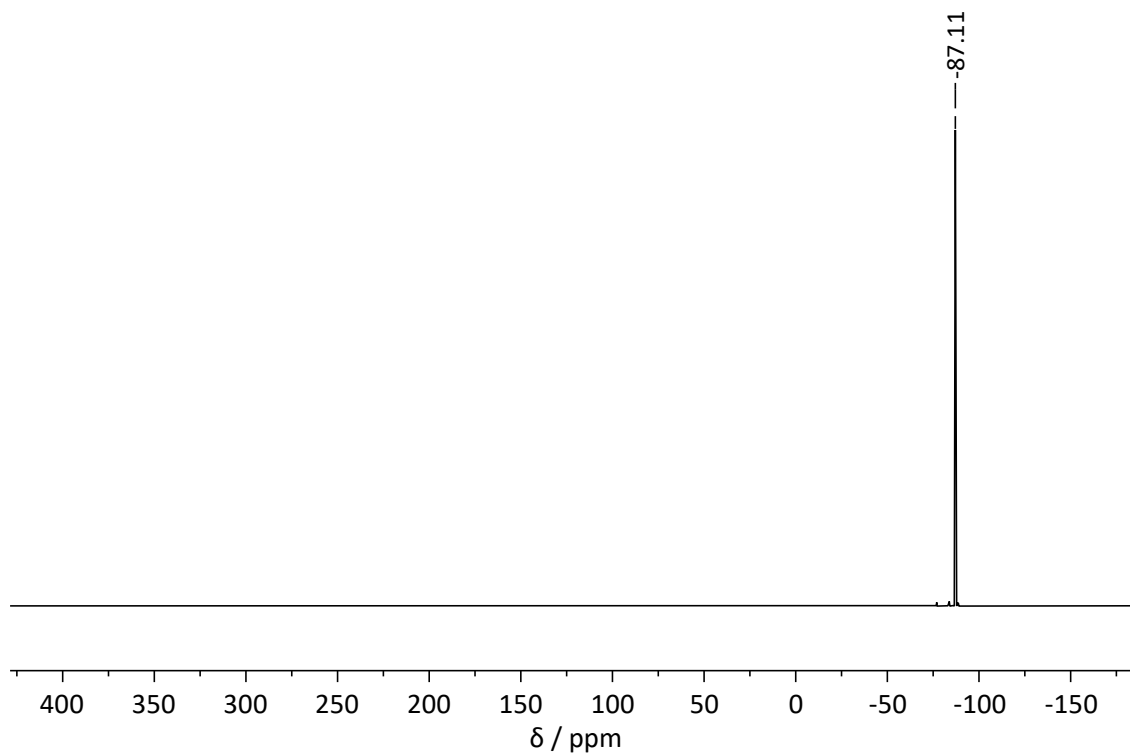

**Figure S30**  $^{31}\text{P}\{^1\text{H}\}$  NMR spectrum ( $\text{C}_6\text{D}_6$ , 202.41 Hz, 298.0 K) of **7a**.

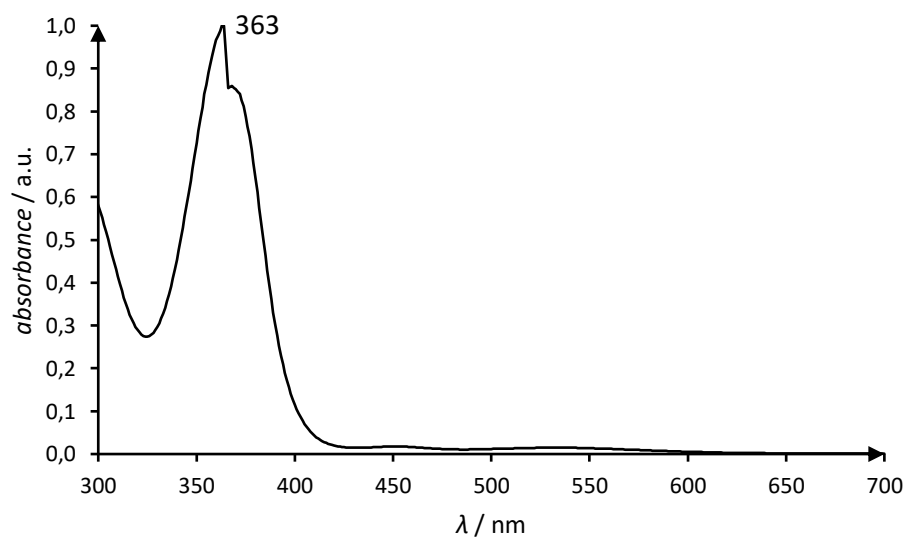

**Figure S31** UV/vis spectrum of **7a** (toluene, ca.  $10^{-6} \text{ mol L}^{-1}$ , r.t.).

### 3.11. $\text{PPh}_2$ -Bis(NHC) adduct **8a**

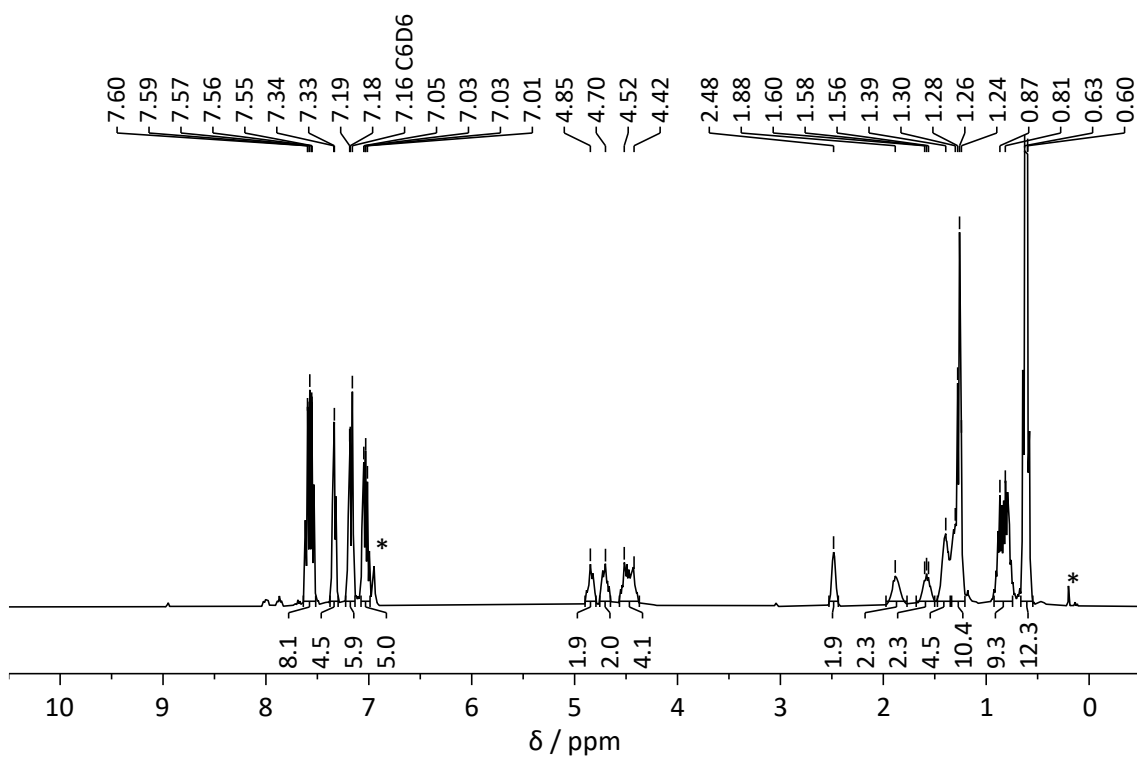

Figure S32  $^1\text{H}$  NMR spectrum ( $\text{C}_6\text{D}_6$ , 400.13 Hz, 298.0 K) of **8a**.

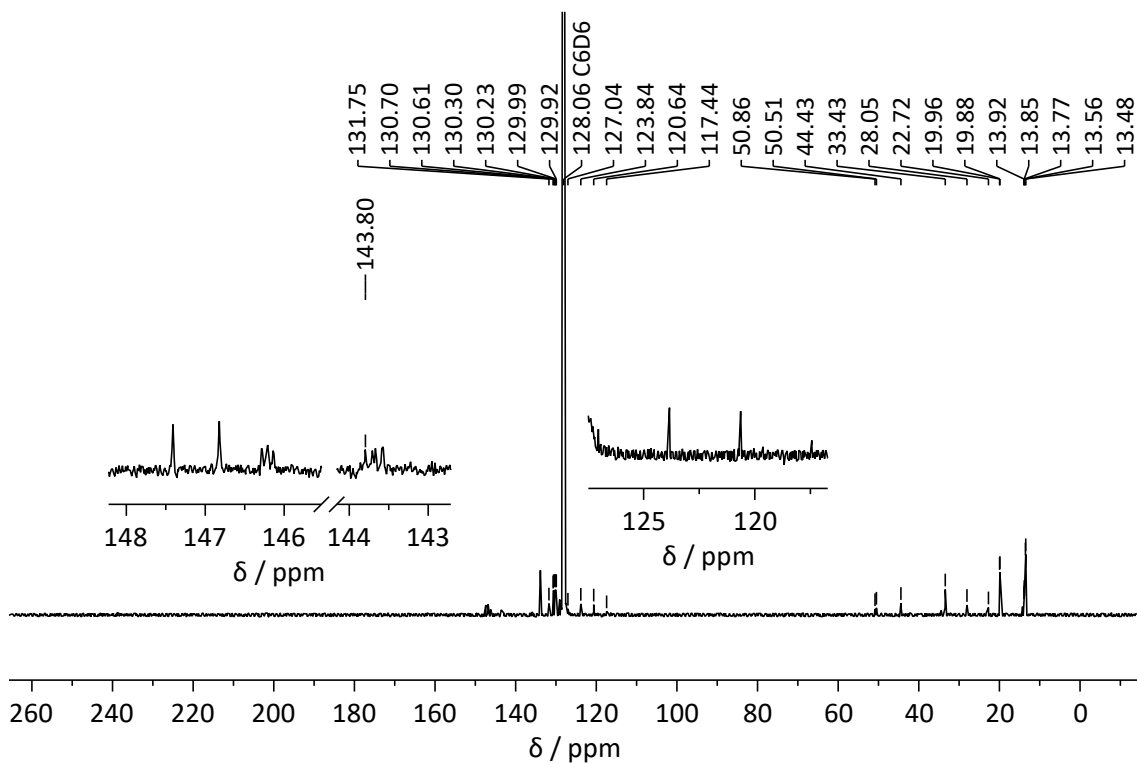

Figure S33  $^{13}\text{C}\{^1\text{H}\}$  NMR spectrum ( $\text{C}_6\text{D}_6$ , 100.63 Hz, 298.0 K) of **8a**.

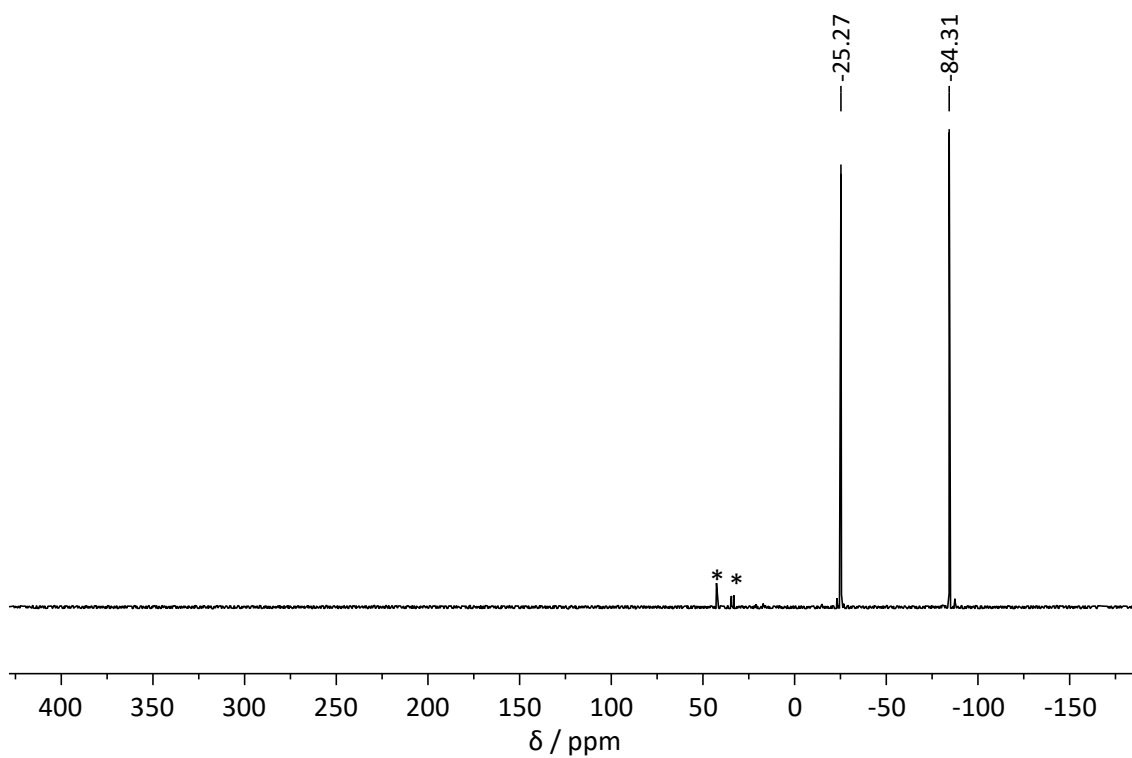

Figure S34  $^{31}\text{P}\{^1\text{H}\}$  NMR spectrum ( $\text{C}_6\text{D}_6$ , 162.00 Hz, 298.0 K) of **8a**.

### 3.12. $\text{Fe}(\text{CO})_4$ Bis(NHC) complex **9a**

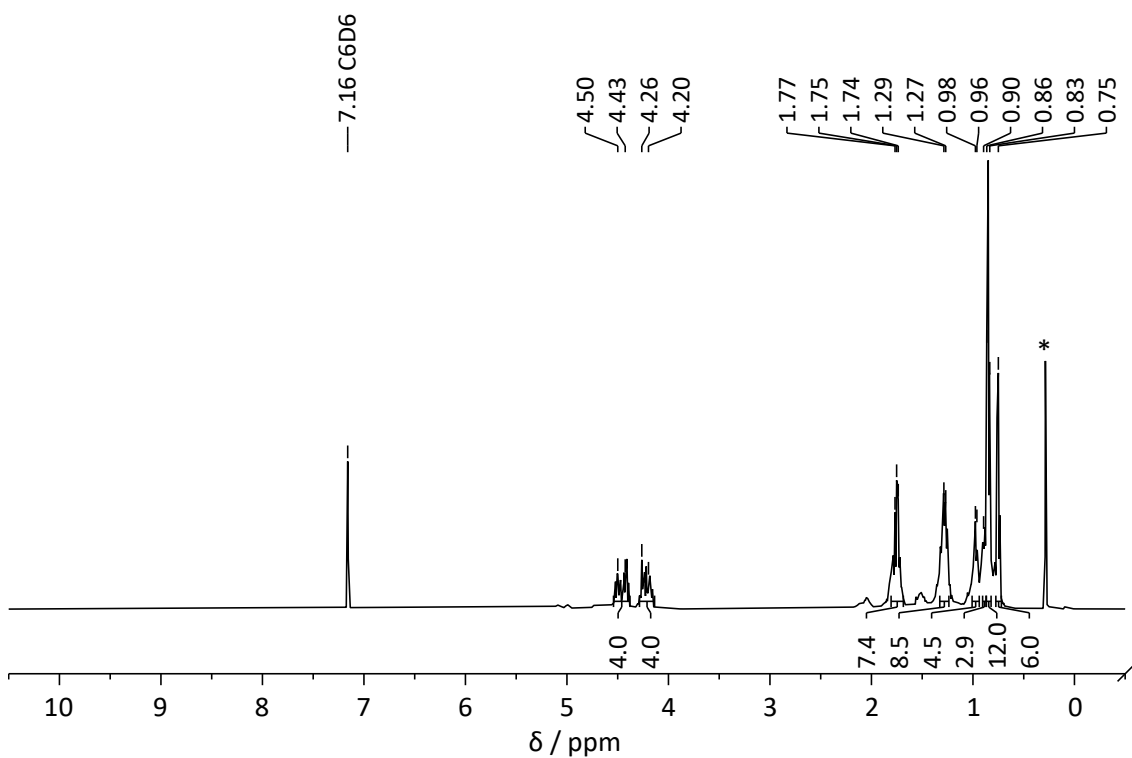

Figure S35  $^1\text{H}$  NMR spectrum ( $\text{C}_6\text{D}_6$ , 500.04 Hz, 298.0 K) of **9a**.

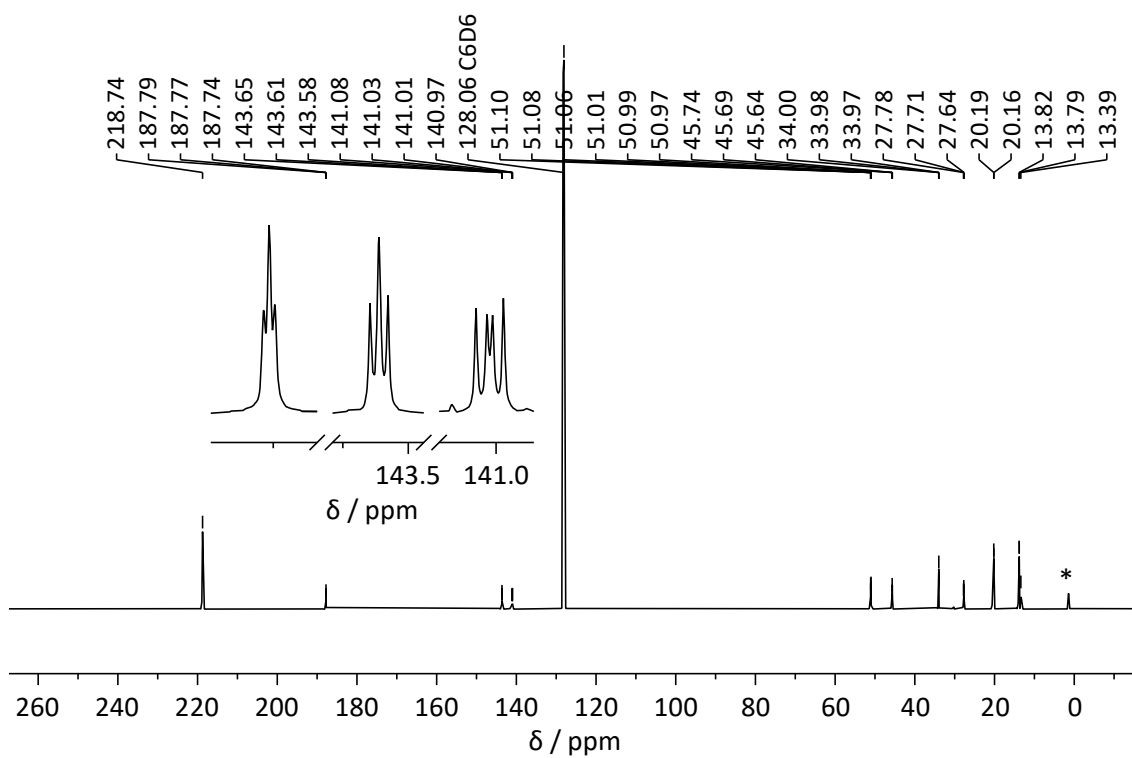

Figure S36  $^{13}\text{C}\{^1\text{H}\}$  NMR spectrum ( $\text{C}_6\text{D}_6$ , 125.75 Hz, 298.0 K) of **9a**.

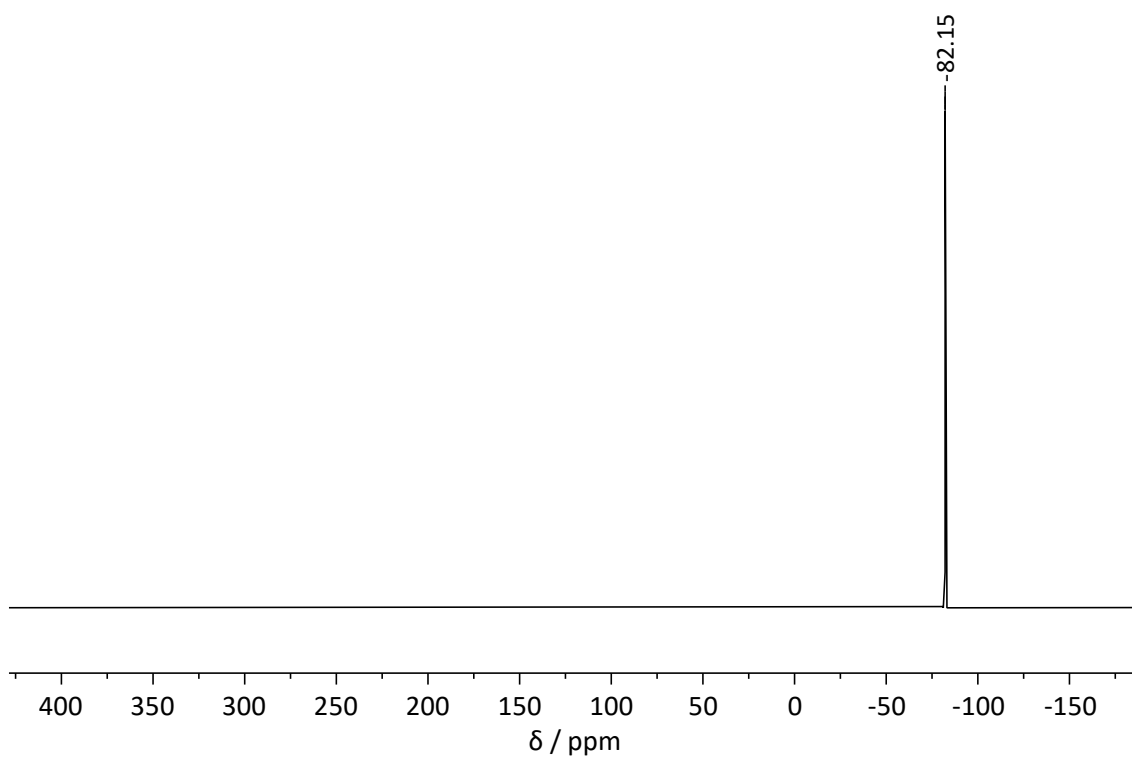

Figure S37  $^{31}\text{P}\{^1\text{H}\}$  NMR spectrum ( $\text{C}_6\text{D}_6$ , 202.44 Hz, 298.0 K) of **9a**.

### 3.13. Attempted synthesis of tri-/tetranuclear $\text{Fe}(\text{CO})_4$ -Bis(NHC) complex

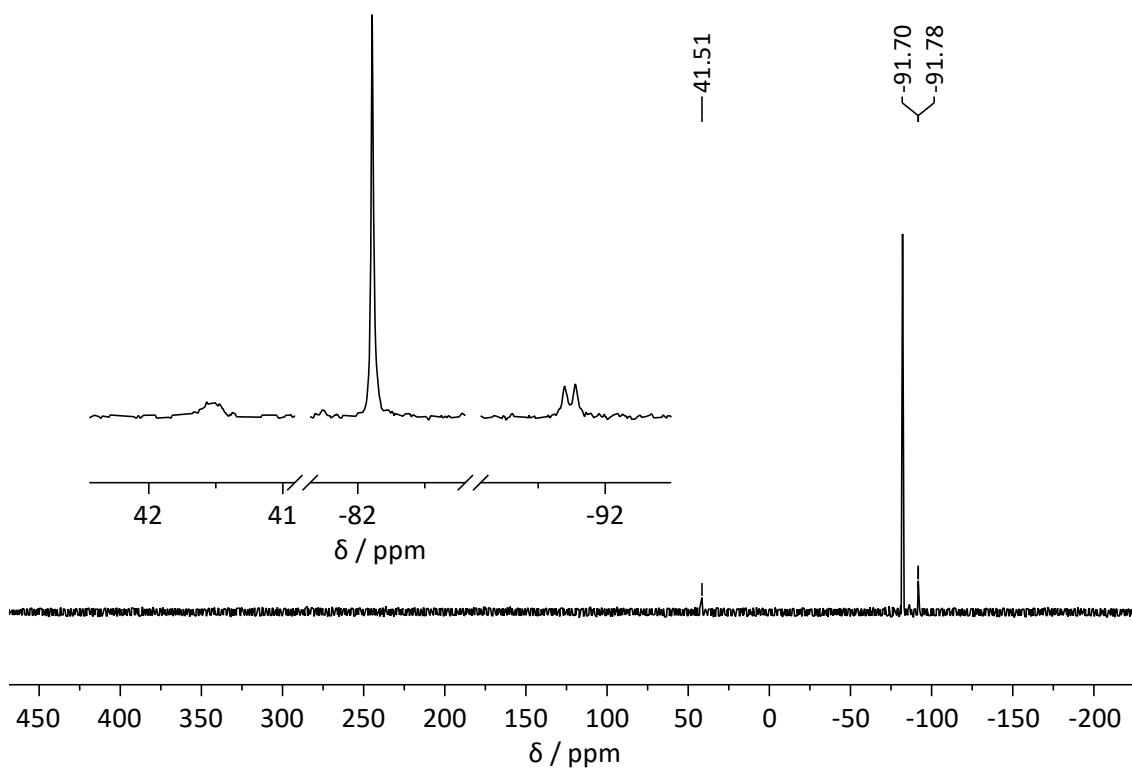

**Figure S38**  $^{31}\text{P}\{^1\text{H}\}$  NMR spectrum (toluene, 121.51 Hz, 298.0 K) of **5a** with 2.3 eq.  $\text{Fe}_2(\text{CO})_9$  in reaction mixture.

### 3.14. Temperature dependent equilibrium between **1** and **2b**

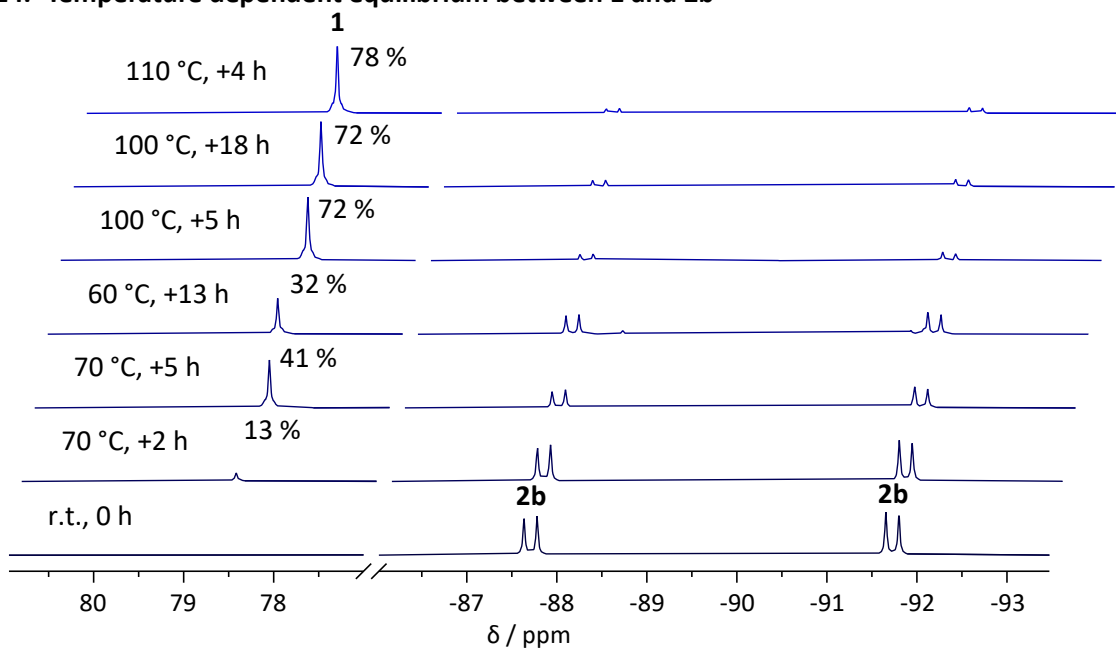

**Figure S39**  $^{31}\text{P}\{^1\text{H}\}$  NMR spectra of **2b** in toluene in a J Young® NMR tube after heating at different temperatures.

### 3.15. Bis(NHC) **5c**



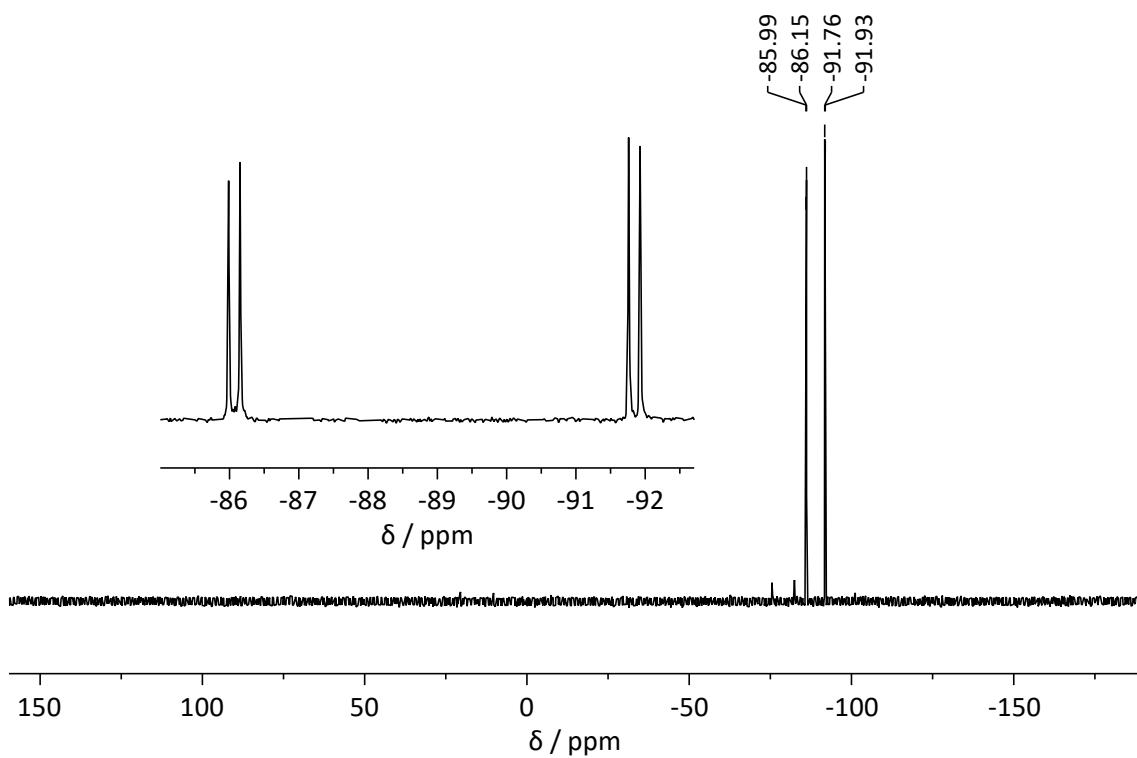

**Figure S40**  $^{31}\text{P}\{^1\text{H}\}$  NMR spectrum (1-octene, 121.51 Hz, 298.0 K) of **5c** in reaction mixture.

### 3.16. $\text{Fe}(\text{CO})_4$ Bis(NHC) complex **9c**

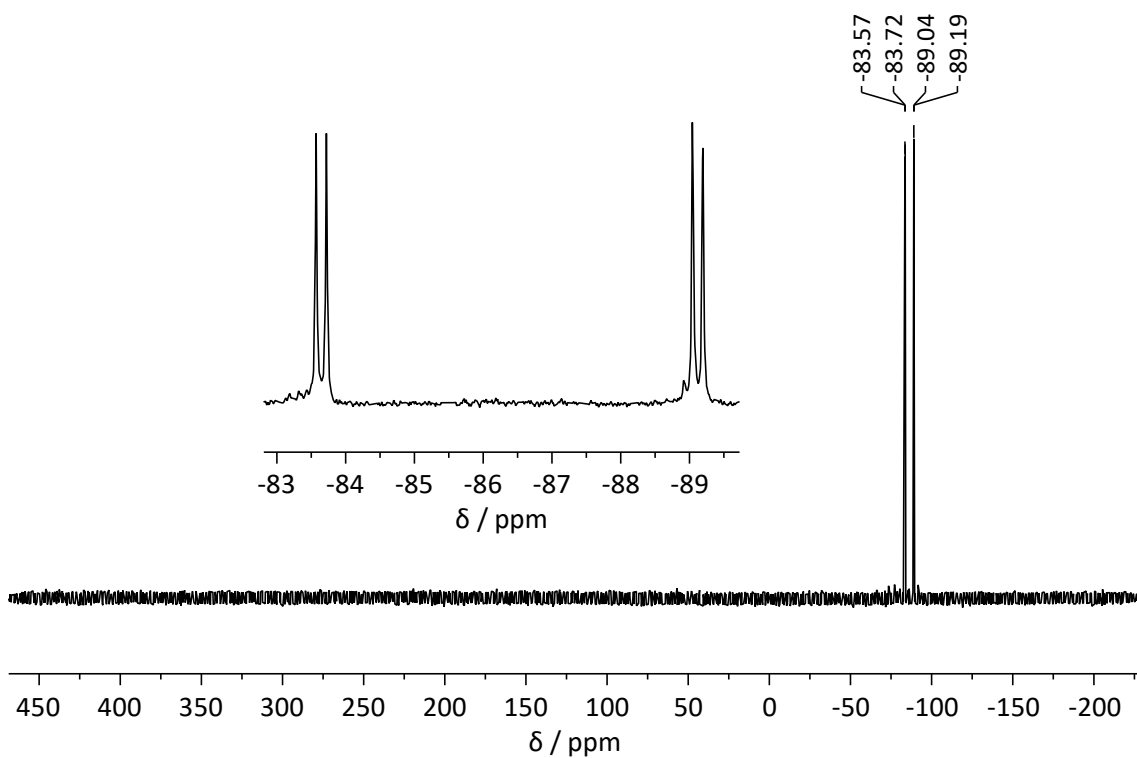

**Figure S41**  $^{31}\text{P}\{^1\text{H}\}$  NMR spectrum (1-octene, 121.51 Hz, 298.0 K) of **9c** in reaction mixture.

### 3.17. Retro-[4+2] cycloaddition of **5a**

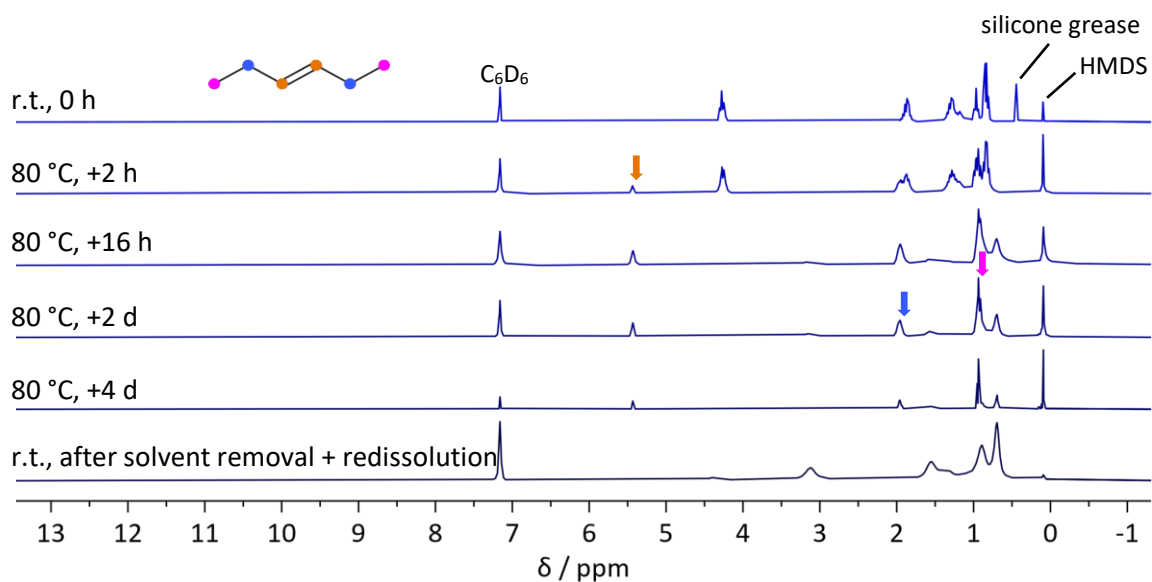

**Figure S42**  $^1\text{H}$  NMR spectra of the of heating a solution of **5a** in  $\text{C}_6\text{D}_6$ . The emergences of  $^1\text{H}$  NMR resonances for 3-hexene are marked with coloured arrows at the point where the signal can clearly be identified.

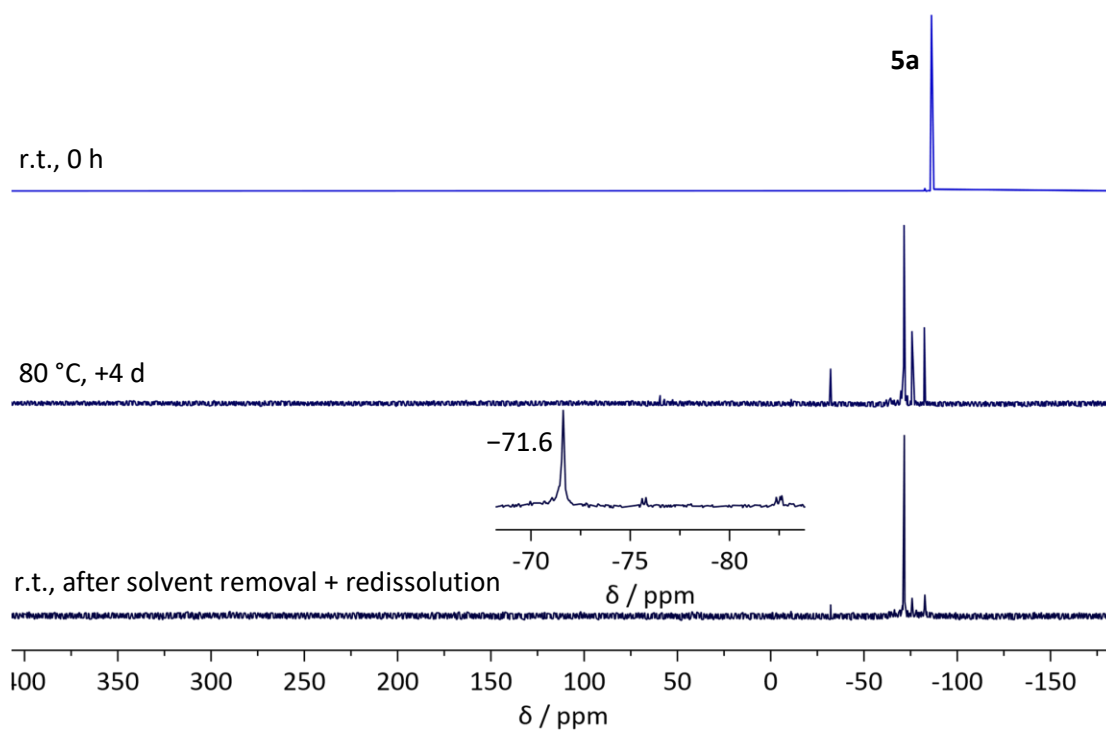

**Figure S43**  $^{31}\text{P}\{^1\text{H}\}$  NMR spectra of the of heating a solution of **5a** in  $\text{C}_6\text{D}_6$ .

## 4. Single crystal X-ray diffraction studies

### 4.1. 1,4-Diphosphabarrelene **2a**

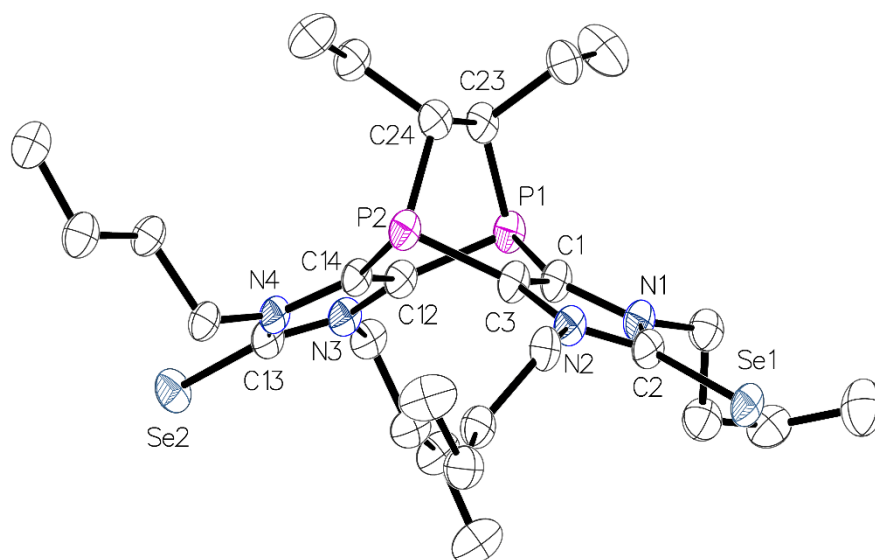

**Figure S44** ORTEP-drawing of molecular structure of **2a** in the crystal. H atoms were omitted for clarity. Ellipsoids set at 50 % probability level.

**Table S1** Crystal data and structure refinements for **2a**.

|                                           |                                                                               |
|-------------------------------------------|-------------------------------------------------------------------------------|
| Identification code                       | GSTR750, TT-500 // GXraycu_6823f                                              |
| Crystal habitus                           | clear colourless plank                                                        |
| Device type                               | Bruker D8 Venture                                                             |
| Empirical formula                         | C <sub>28</sub> H <sub>48</sub> N <sub>4</sub> P <sub>2</sub> Se <sub>2</sub> |
| Moiety formula                            | C <sub>28</sub> H <sub>48</sub> N <sub>4</sub> P <sub>2</sub> Se <sub>2</sub> |
| Formula weight / g mol <sup>-1</sup>      | 660.56                                                                        |
| T / K                                     | 100                                                                           |
| Crystal system                            | triclinic                                                                     |
| Space group                               | <i>P</i> -1                                                                   |
| <i>a</i> / Å                              | 10.1836(4)                                                                    |
| <i>b</i> / Å                              | 11.7770(5)                                                                    |
| <i>c</i> / Å                              | 14.4181(6)                                                                    |
| $\alpha$ / °                              | 108.515(2)                                                                    |
| $\beta$ / °                               | 95.741(3)                                                                     |
| $\gamma$ / °                              | 97.957(3)                                                                     |
| <i>V</i> / Å <sup>3</sup>                 | 1604.70(12)                                                                   |
| <i>Z</i>                                  | 2                                                                             |
| $\rho_{\text{calc}}$ / g cm <sup>-3</sup> | 1.367                                                                         |
| $\mu$ / mm <sup>-1</sup>                  | 3.988                                                                         |

|                                                 |                                                              |
|-------------------------------------------------|--------------------------------------------------------------|
| $F(000)$                                        | 684.0                                                        |
| Crystal size / mm <sup>3</sup>                  | 0.241 × 0.039 × 0.037                                        |
| Absorption correction                           | empirical                                                    |
| $T_{min}; T_{max}$                              | 0.4152; 0.7535                                               |
| Radiation                                       | Cu-K $\alpha$ ( $\lambda = 1.54178 \text{ \AA}$ )            |
| 2 $\theta$ range for data collection / °        | 6.542 to 135.462                                             |
| Completeness to $\theta$                        | 0.970                                                        |
| Index ranges                                    | $-12 \leq h \leq 12, -14 \leq k \leq 14, -17 \leq l \leq 17$ |
| Reflections collected                           | 19425                                                        |
| Independent reflections                         | 5640 ( $R_{int} = 0.0612, R_{sigma} = 0.0598$ )              |
| Data / restraints / parameters                  | 5640 / 285 / 331                                             |
| Goodness-of-fit on $F^2$                        | 1.141                                                        |
| Final $R$ indexes ( $I \geq 2\sigma(I)$ )       | $R_1 = 0.0700, \omega R_2 = 0.2027$                          |
| Final $R$ indexes (all data)                    | $R_1 = 0.0829, \omega R_2 = 0.2108$                          |
| Largest diff. peak / hole / e $\text{\AA}^{-3}$ | 1.22 / -0.65                                                 |

#### 4.2. Bis(NHC) 5a

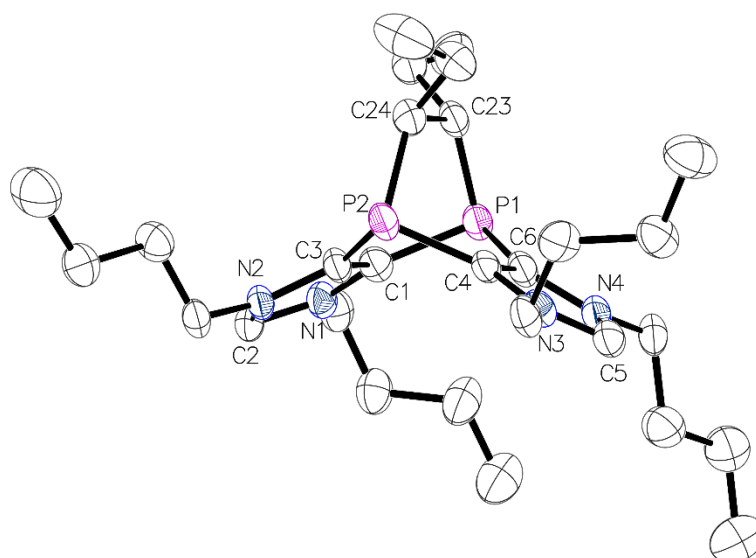

**Figure S45** ORTEP-drawing of molecular structure of **5a** in the crystal. H atoms were omitted for clarity. Ellipsoids set at 50 % probability level.

**Table S2** Crystal data and structure refinements for **5a**.

|                                      |                                                               |
|--------------------------------------|---------------------------------------------------------------|
| Identification code                  | GSTR778, TT-592 // GXray6966                                  |
| Crystal habitus                      | clear colourless plate                                        |
| Device type                          | Stadivari                                                     |
| Empirical formula                    | C <sub>28</sub> H <sub>48</sub> N <sub>4</sub> P <sub>2</sub> |
| Moiety formula                       | C <sub>28</sub> H <sub>48</sub> N <sub>4</sub> P <sub>2</sub> |
| Formula weight / g mol <sup>-1</sup> | 502.64                                                        |

|                                                              |                                                                               |
|--------------------------------------------------------------|-------------------------------------------------------------------------------|
| T / K                                                        | 100                                                                           |
| Crystal system                                               | monoclinic                                                                    |
| Space group                                                  | P2 <sub>1</sub> /c                                                            |
| <i>a</i> / Å                                                 | 17.3905(7)                                                                    |
| <i>b</i> / Å                                                 | 14.4115(4)                                                                    |
| <i>c</i> / Å                                                 | 24.3244(11)                                                                   |
| $\alpha$ / °                                                 | 90                                                                            |
| $\beta$ / °                                                  | 103.089(3)                                                                    |
| $\gamma$ / °                                                 | 90                                                                            |
| <i>V</i> / Å <sup>3</sup>                                    | 5937.9(4)                                                                     |
| <i>Z</i>                                                     | 8                                                                             |
| $\rho_{calc}$ / g cm <sup>-3</sup>                           | 1.125                                                                         |
| $\mu$ / mm <sup>-1</sup>                                     | 1.482                                                                         |
| <i>F</i> (000)                                               | 2192.0                                                                        |
| Crystal size / mm <sup>3</sup>                               | 0.2 × 0.2 × 0.01                                                              |
| Absorption correction                                        | multi-scan                                                                    |
| <i>T</i> <sub>min</sub> ; <i>T</i> <sub>max</sub>            | 0.6694; 0.8969                                                                |
| Radiation                                                    | Cu-K $\alpha$ ( $\lambda$ = 1.54186 Å)                                        |
| 2 $\theta$ range for data collection / °                     | 7.18 to 135.492                                                               |
| Completeness to $\theta$                                     | 0.978                                                                         |
| Index ranges                                                 | -15 ≤ <i>h</i> ≤ 20, -17 ≤ <i>k</i> ≤ 14, -29 ≤ <i>l</i> ≤ 27                 |
| Reflections collected                                        | 73734                                                                         |
| Independent reflections                                      | 10503 ( <i>R</i> <sub>int</sub> = 0.1397, <i>R</i> <sub>sigma</sub> = 0.0720) |
| Data / restraints / parameters                               | 10503 / 541 / 636                                                             |
| Goodness-of-fit on <i>F</i> <sup>2</sup>                     | 1.043                                                                         |
| Final <i>R</i> indexes ( <i>I</i> ≥ 2 $\sigma$ ( <i>I</i> )) | <i>R</i> <sub>1</sub> = 0.0890, $\omega R$ <sub>2</sub> = 0.2054              |
| Final <i>R</i> indexes (all data)                            | <i>R</i> <sub>1</sub> = 0.1519, $\omega R$ <sub>2</sub> = 0.2474              |
| Largest diff. peak / hole / e Å <sup>-3</sup>                | 0.49 / -0.50                                                                  |

#### 4.3. $\text{BCl}_3$ -Bis(NHC) adduct **6a**

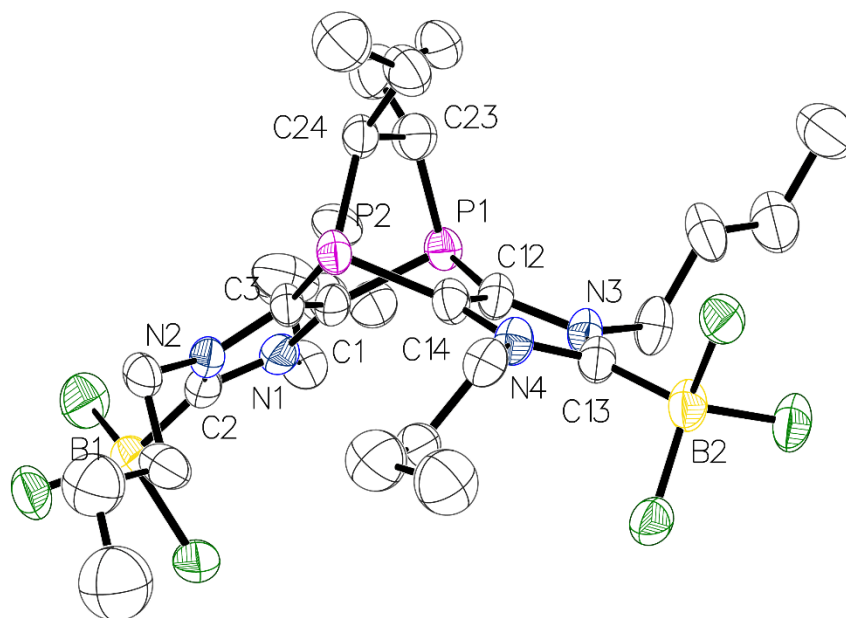

**Figure S46** ORTEP-drawing of molecular structure of **6a** in the crystal. H atoms were omitted for clarity. Ellipsoids set at 50 % probability level.

#### 4.4. $\text{Fe}(\text{CO})_4$ -Bis(NHC) complex **9a**

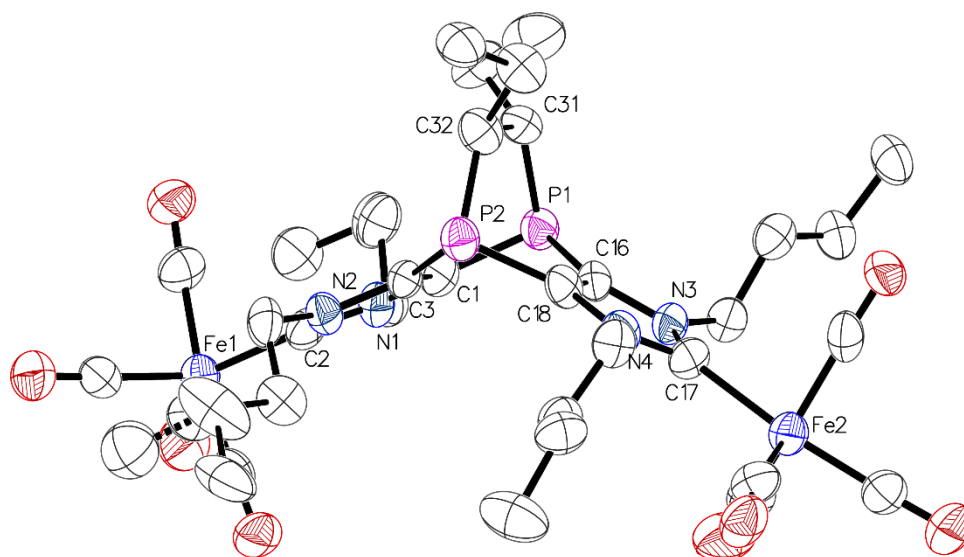

**Figure S47** ORTEP-drawing of molecular structure of **9a** in the crystal. H atoms were omitted for clarity. Ellipsoids set at 50 % probability level.

## 5. Computational details

All geometric optimisation and energy calculations were performed with *ORCA 5.0*.<sup>5,6</sup> Structures were optimised at the TPSS-D4/def2-TZVP/CPCM<sub>THF</sub> level of theory which combines the TPSS<sup>7</sup> meta-GGA density functional with the charge dependent atom-pairwise DFT-D4 dispersion correction which uses the D4(EEQ)-ATM dispersion model<sup>8</sup> and the def2-TZVP basis set<sup>9-12</sup> using the conductor-like polarisable continuum model (CPCM)<sup>13</sup> for THF ( $\epsilon = 7.25$ ). The minimum or transition state nature of the compounds has been determined by numerical frequency calculations. All minima have zero imaginary frequencies below  $-50 \text{ cm}^{-1}$  which can be the numerical error according to the *ORCA 5.0.4* manual.<sup>14</sup> If single imaginary frequencies between 0 and  $-50 \text{ cm}^{-1}$  appeared they were checked carefully and in all cases only belonged to small rotations of *N*-Me substituent whose contributions in energy difference fall within the method's error margins. Transition states possess only one imaginary frequency that describes the transition from starting material to product. The transition states have been computed with the help of the nudge elastic band optimiser (NEB)<sup>6,15</sup> as implemented in *ORCA 5.0*. Single-point calculations were performed at the PW6B95-D4/def2-QZVP/CPCM<sub>THF</sub> level of theory which combines the PW6B95 hybrid-meta-GGA functional<sup>16</sup> with the larger def2-QZVP basis set.<sup>9-12</sup> NICS(1) values were calculated at the B3LYP-D4/def2-TZVPPD level of theory combining the hybrid functional B3LYP<sup>16</sup> with the def2-TZVPPD basis set<sup>9-12</sup> and using the NMR module of *ORCA 5.0* utilising Gauge including atomic orbitals (GIAOs).<sup>17</sup> Values were obtained by calculating the NICS(1) value of benzene at the same levels of theory. The B3LYP functional was chosen here for general comparability as it is often used, performed well for the synthesised systems in a self-conducted small study and gave reliable results with relatively low resource cost. The density-fitting RI-J (def2/J)<sup>9,17</sup> approach was used to accelerate geometry optimisations, numerical frequency and single point energy calculations.

The graphical representations of the calculated structures and their frontier molecular orbitals (FMOs) were generated with *UCSF Chimera 1.15*.<sup>18</sup>

Below are listed the optimised cartesian coordinates (in Å) with electronic energies (in Hartree) in THF solution. All structures of new compounds were computed as model compounds with *N*-methyl instead of *N*-*n*-butyl substitution to save computational costs. Zero point energies ( $E_{ZPE}$ ), thermal corrections ( $E_T$ ) at 298.15 K and entropy corrections ( $E_S$ ) were taken from the optimisation calculations.

### 5.1. 1,4-Diphosphinine Me-1

$$E = -6097.14773569006$$

$$E_{ZPE} = 0.21546057$$

$$E_T = 0.01970719$$

$$E_S = -0.06819458$$

|   |                   |                   |                   |
|---|-------------------|-------------------|-------------------|
| C | -6.63659639604487 | -6.76349954779763 | -0.57437989494840 |
| C | -7.01810281038773 | -5.46793769503506 | -0.98979277550357 |
| C | -4.58925997056719 | -4.59092680656701 | -0.48861089151771 |
| C | -4.20812501952794 | -5.88621426362723 | -0.07201944422323 |
| P | -6.11504632344754 | -3.97316931032637 | -1.07857002716934 |
| P | -5.11073904930460 | -7.38130306527148 | 0.01539260018824  |
| N | -7.76343167323847 | -7.56271540650167 | -0.71509567477563 |
| N | -8.35412542067073 | -5.55730274052072 | -1.35752668735538 |
| N | -3.46236502488408 | -3.79177491126075 | -0.34809678467092 |
| N | -2.87256135163947 | -5.79650218136778 | 0.29726426623751  |
| C | -9.13715627156274 | -4.42944132870743 | -1.84950185040084 |

|    |                    |                   |                   |
|----|--------------------|-------------------|-------------------|
| H  | -9.15478659860490  | -3.64135607172510 | -1.09138366195778 |
| H  | -8.68711916939980  | -4.04651203792609 | -2.76984811339602 |
| H  | -10.14785880432339 | -4.78917335772211 | -2.04431854452550 |
| C  | -7.79636573754305  | -8.98342537610885 | -0.38622870594260 |
| H  | -7.06122100701810  | -9.51543426627857 | -0.99657340216856 |
| H  | -7.56282362851465  | -9.11692771566574 | 0.67388376285446  |
| H  | -8.80107938203511  | -9.34834796592270 | -0.60112625486687 |
| C  | -2.08981735200652  | -6.92415149805342 | 0.79013012127655  |
| H  | -2.05535426100451  | -7.70532782936717 | 0.02541818776488  |
| H  | -1.08449120628588  | -6.55997413695446 | 1.00359763985677  |
| H  | -2.55169749250347  | -7.31810341610561 | 1.69985784847377  |
| C  | -3.42922396171315  | -2.37115287972720 | -0.67734494170440 |
| H  | -2.42210444849058  | -2.00828098769303 | -0.47040169710144 |
| H  | -3.67087585443098  | -2.23765498358184 | -1.73562382751375 |
| H  | -4.15839116956245  | -1.83730667470270 | -0.06143332927126 |
| Se | -0.70977823540036  | -3.90794120454322 | 0.48230109174520  |
| C  | -2.40380846072507  | -4.51870859053487 | 0.13231596637379  |
| C  | -8.82249584556139  | -6.83539934713249 | -1.19380113133125 |
| Se | -10.51669807360122 | -7.44603440327164 | -1.54318384442673 |

## 5.2. 1,4-Diphosphabarrelene Me-2a

$E = -6333.43866871791$

$E_{ZPE} = 0.38173882$

$E_T = 0.02732074$

$E_S = -0.08286413$

|   |                   |                   |                   |
|---|-------------------|-------------------|-------------------|
| P | 7.35624341239364  | 5.63915417540039  | 5.84925366042591  |
| P | 5.08170920093830  | 6.67855235722052  | 8.06455140005477  |
| N | 7.23186120375796  | 8.47597915907024  | 5.25405278733431  |
| N | 5.77153929549200  | 9.16106232069358  | 6.73387673260759  |
| N | 3.69277502274990  | 4.46096756723462  | 6.81640676278227  |
| N | 5.19789012001919  | 3.75774564850488  | 5.39078017152605  |
| C | 6.77443833386490  | 7.35566584111325  | 5.92886574841748  |
| C | 6.61208809463244  | 9.59558457703808  | 5.74371203291806  |
| C | 5.86539268780132  | 7.78199708232352  | 6.85686643474727  |
| C | 4.77084794977499  | 5.32697253453042  | 6.89470335001461  |
| C | 3.94777381057381  | 3.48813754422329  | 5.88243579870651  |
| C | 5.71351911074939  | 4.88779320835554  | 6.00905080462092  |
| C | 8.21378516440371  | 8.49194858154322  | 4.17428121191606  |
| C | 4.90870544493200  | 10.04359982944466 | 7.51321840121403  |
| C | 2.47138382486157  | 4.56233311546466  | 7.61084095206870  |
| C | 5.85859843984302  | 2.96381189646964  | 4.35889221657969  |
| C | 7.80485871455491  | 5.56264828750473  | 7.69860710200930  |
| C | 6.69714553225507  | 5.91488425579716  | 8.72907616583978  |
| C | 9.06111178666299  | 6.42320275637364  | 7.94332958372970  |
| C | 10.26612538528977 | 6.06244548923349  | 7.07133439160715  |
| C | 6.35117609527563  | 4.69103075479542  | 9.60001151173911  |
| C | 5.41757556864323  | 4.98957354296809  | 10.77577627106464 |
| H | 7.75600168659086  | 8.89411073347040  | 3.26752160564536  |
| H | 8.54383332052652  | 7.46584154502716  | 4.00747926172763  |
| H | 9.06050670272746  | 9.12017866796213  | 4.45946054011360  |
| H | 4.31960521199971  | 9.42448368933307  | 8.19088512297787  |



|    |                   |                   |                   |
|----|-------------------|-------------------|-------------------|
| H  | 4.25263453205861  | 10.59908014790104 | 6.83935159040186  |
| H  | 5.52057411873013  | 10.74835118452757 | 8.08111310604392  |
| H  | 1.99505930083498  | 5.52793987670827  | 7.42658748599395  |
| H  | 2.71588758197258  | 4.46632200551515  | 8.67140396459549  |
| H  | 1.81228114063075  | 3.74992129763574  | 7.30208368607004  |
| H  | 5.24129890870117  | 2.94819281702845  | 3.45800260181502  |
| H  | 5.99972088476047  | 1.94130486941036  | 4.71635351763439  |
| H  | 6.82349544699987  | 3.42698788870003  | 4.14871516473445  |
| H  | 8.06912128653990  | 4.50561803507988  | 7.83510417793890  |
| H  | 7.08491154293490  | 6.71096528182100  | 9.37886031683053  |
| H  | 8.79534761108648  | 7.47929279897690  | 7.80355616560509  |
| H  | 9.32997461572789  | 6.30982080471287  | 9.00146302353947  |
| H  | 11.14060261731659 | 6.65110353993091  | 7.36744634109967  |
| H  | 10.07352925852339 | 6.26042360976937  | 6.01105988300072  |
| H  | 10.51912001573812 | 5.00071997750067  | 7.17266467737973  |
| H  | 5.91870771468669  | 3.91111854903911  | 8.95922468300756  |
| H  | 7.29726026997375  | 4.28661287361363  | 9.98219712307451  |
| H  | 5.28902644949339  | 4.09717828710503  | 11.39708474068826 |
| H  | 4.42529300148162  | 5.30740598719873  | 10.43714319755294 |
| H  | 5.82762168581111  | 5.78751389735268  | 11.40562230825551 |
| Se | 2.84864497804221  | 2.09798178920121  | 5.35831324174368  |
| Se | 6.85029591664021  | 11.33363932017481 | 5.17317898060494  |

### 5.3. *Trans*-3-hexene

$$E = -236.265093679682$$

$$E_{ZPE} = 0.16211694$$

$$E_T = 0.00817955$$

$$E_S = -0.0409027$$

|   |                   |                   |                   |
|---|-------------------|-------------------|-------------------|
| C | -4.80070142793797 | -0.48323146733284 | 0.14402445255520  |
| H | -4.40330364761575 | -1.48679963469822 | 0.33177243751068  |
| H | -4.41535761741107 | -0.13519373357744 | -0.82071352554108 |
| H | -5.89126427572447 | -0.56129278086869 | 0.06579682547295  |
| C | -4.40092521823713 | 0.48102463439091  | 1.27559302499868  |
| H | -4.77203917944567 | 1.48554067821021  | 1.02491742262931  |
| H | -3.30796354335326 | 0.54954777905405  | 1.33868918154215  |
| C | -4.95555168043475 | 0.06318870265969  | 2.60836663619785  |
| H | -6.04547977595689 | 0.01287937559236  | 2.68037535381037  |
| C | -4.22453775928559 | -0.26595556934958 | 3.67863263340918  |
| H | -3.13460989678030 | -0.21557642505567 | 3.60664706213067  |
| C | -4.77916343521612 | -0.68388822956714 | 5.01137766067772  |
| H | -4.40799504237458 | -1.68839497558424 | 5.26201345321946  |
| H | -5.87212003562952 | -0.75247217470859 | 4.94825870251290  |
| C | -4.37946281009056 | 0.28033860489384  | 6.14299772473285  |
| H | -4.77691142524214 | 1.28389410518437  | 5.95528759058947  |
| H | -4.76480771069156 | -0.06776447206509 | 7.10771197689427  |
| H | -3.28890551857260 | 0.35845558282207  | 6.22125138665732  |

### 5.4. Transition state Me-2a-TS

$$E = -6333.39757299952$$

$$E_{ZPE} = 0.37861033$$

$$E_T = 0.027709$$

$E_5 = -0.08386964$

imf =  $-241.86 \text{ cm}^{-1}$

|    |                   |                   |                   |
|----|-------------------|-------------------|-------------------|
| C  | -0.46919300327267 | -1.62558617401646 | -0.08429841734242 |
| C  | -1.05624131887346 | -0.82988308542107 | -1.05880148211223 |
| C  | 1.07305476586562  | 0.75454446921844  | -1.05242755950148 |
| C  | 1.69634705794336  | -0.09340061754341 | -0.14750827437810 |
| P  | -0.65935840920250 | 0.86535113263578  | -1.40428838346347 |
| P  | 0.88072986576841  | -1.19390831839693 | 0.98031065607624  |
| N  | -1.27133657823376 | -2.75568920559278 | 0.04712795134412  |
| N  | -2.19549713984452 | -1.50328157771409 | -1.48914045138205 |
| N  | 2.03855871134683  | 1.65753507430122  | -1.48745474366012 |
| N  | 3.02307962867663  | 0.31953076940947  | -0.06537353359933 |
| C  | -3.10179897751426 | -1.07051807853353 | -2.54935668823880 |
| H  | -4.09086485396021 | -0.86628495940921 | -2.13365318032027 |
| H  | -2.68882026107807 | -0.16549919580103 | -2.99756945377312 |
| H  | -3.18217779456930 | -1.86139792738800 | -3.29825528469440 |
| C  | -1.02662468718875 | -3.86409840322374 | 0.96409791666628  |
| H  | -1.58226129582360 | -3.71573100818097 | 1.89430588613367  |
| H  | -1.35836071464480 | -4.78715087521347 | 0.48633268896751  |
| H  | 0.04386767303876  | -3.90250735984168 | 1.17458910238310  |
| C  | 4.07490071419382  | -0.32278408728936 | 0.71850857840816  |
| H  | 3.64724790337777  | -1.20524933401997 | 1.19713242506189  |
| H  | 4.89327689082276  | -0.61209278813812 | 0.05546890526107  |
| H  | 4.45111838891293  | 0.37024667018206  | 1.47390982886301  |
| C  | 1.80365001930650  | 2.73558223732442  | -2.44219811029130 |
| H  | 1.17970374386361  | 2.35567601873637  | -3.25425296887410 |
| H  | 1.29971309196569  | 3.57181875600227  | -1.94906408243438 |
| H  | 2.77341296927984  | 3.06172530019206  | -2.82067492301920 |
| Se | 4.84584604873612  | 2.25607414683696  | -1.14591087023859 |
| C  | 3.24050410545897  | 1.38928751174841  | -0.89104117260494 |
| C  | -2.32833459197707 | -2.68848061956594 | -0.81770530342387 |
| Se | -3.65761450384879 | -3.93935162904777 | -1.05909803099163 |
| H  | -0.70233522949679 | 0.12295487108928  | 2.62654688220129  |
| C  | -0.29652982622621 | 0.81062625343658  | 1.88355680487997  |
| C  | -1.23071598596696 | 1.35281220287730  | 0.97871342487578  |
| C  | 0.88320974125172  | 1.65131590141783  | 2.32565216044869  |
| H  | -1.06898912426580 | 2.39562062468434  | 0.70351188020488  |
| C  | -2.67306805329799 | 0.89378803796879  | 1.02903457066561  |
| H  | 0.48093865004023  | 2.58051734496081  | 2.75577349279014  |
| H  | 1.46220751828908  | 1.96518379992598  | 1.44806809190381  |
| H  | -3.03660956006439 | 1.07175135297845  | 2.05200117956053  |
| H  | -2.72255315852580 | -0.19328595864451 | 0.88893759573001  |
| C  | 1.78881394573483  | 0.98704198380637  | 3.36294644697576  |
| H  | 2.59812259534587  | 1.66189081198435  | 3.65838502366424  |
| H  | 1.21777870746732  | 0.72319932125029  | 4.26020786020704  |
| H  | 2.24122195098798  | 0.06566250427007  | 2.98096995740864  |
| C  | -3.60391597478456 | 1.60733068565030  | 0.04838900290736  |
| H  | -4.63241743887299 | 1.25120894394426  | 0.16292833260421  |
| H  | -3.59385240232989 | 2.68879986427100  | 0.22442314198769  |
| H  | -3.30313380381153 | 1.44150461187851  | -0.99165687383696 |

## 5.5. 1,4-Diphosphabarrelene Me-2b

$E = -6333.43874187026$

$E_{ZPE} = 0.38270019$

$E_T = 0.02773531$

$E_S = -0.08395965$

|   |                   |                   |                  |
|---|-------------------|-------------------|------------------|
| P | 7.35324715794990  | 5.58740026899647  | 5.87018515412861 |
| P | 5.08660273100894  | 6.62896071038327  | 8.09260046386955 |
| N | 7.29755651008531  | 8.43585968569669  | 5.33937412231956 |
| N | 5.82305586118484  | 9.12424966161496  | 6.80313688842223 |
| N | 3.65377089489239  | 4.46949633831810  | 6.77571261029871 |
| N | 5.16372997596546  | 3.76150782079822  | 5.35711142147264 |
| C | 6.78952542595899  | 7.31058188119815  | 5.96955387609573 |
| C | 6.70042800628011  | 9.55994432476056  | 5.84596262307867 |
| C | 5.87022294916352  | 7.74042947573468  | 6.88781311721107 |
| C | 4.75819366149418  | 5.29657366818273  | 6.90415780275358 |
| C | 3.89725601875693  | 3.51970794807070  | 5.81793292000337 |
| C | 5.70280850180806  | 4.85488173638437  | 6.02056944681447 |
| C | 8.31032283030060  | 8.45149335305016  | 4.28828440220520 |
| C | 4.96509180939634  | 10.01088576310114 | 7.58352885520689 |
| C | 2.40306424284876  | 4.57119105063729  | 7.52190472104988 |
| C | 5.81555272865310  | 2.97618259995423  | 4.31349614230284 |
| C | 7.81338408894774  | 5.50303932397594  | 7.72111067765033 |
| C | 6.69100316546922  | 5.85957235919764  | 8.72608034977366 |
| C | 9.04992908590912  | 6.39399847771829  | 7.95526071750287 |
| C | 10.24964581351845 | 6.09303142407676  | 7.05384418460189 |
| H | 7.90775750962497  | 8.94325208731717  | 3.40003484856555 |
| H | 8.57336823858156  | 7.41728252395380  | 4.06274188213538 |
| H | 9.19087938032497  | 8.99717822448319  | 4.63520988474235 |
| H | 4.33783802199358  | 9.39176202434708  | 8.22598897630269 |
| H | 4.34629523730038  | 10.60540375798474 | 6.90776616566166 |
| H | 5.58120894132338  | 10.67991468426852 | 8.18879554160404 |
| H | 1.57434538778096  | 4.72587484824012  | 6.82735066736442 |
| H | 2.48680406833175  | 5.41758505421375  | 8.20462310157373 |
| H | 2.23517602480196  | 3.64868003339630  | 8.08241127941519 |
| H | 5.20392629241812  | 2.99315346676858  | 3.40873566897748 |
| H | 5.93284403283270  | 1.94321915477562  | 4.64935967763397 |
| H | 6.79148487340639  | 3.42282373860245  | 4.11934876569488 |
| H | 8.09143316952688  | 4.45187416117334  | 7.86357884659271 |
| H | 7.07602237406138  | 6.57254271989620  | 9.46371886415372 |
| H | 8.75173093874332  | 7.44509324830714  | 7.83788029668066 |
| H | 9.34795506520910  | 6.27471704039960  | 9.00563934010786 |
| H | 9.97041908586729  | 6.22757943405548  | 5.99962362953581 |
| H | 10.53405869032698 | 5.03692139168895  | 7.16334874151537 |
| H | 6.36319333245076  | 4.96905876546744  | 9.27173171368606 |
| C | 11.45563303035401 | 6.98682708842764  | 7.36291423791453 |
| H | 11.75486508051718 | 6.84208556257767  | 8.40989488579949 |
| H | 11.15431347018314 | 8.03884156492178  | 7.26666014228391 |
| C | 12.64654600340164 | 6.70617803987788  | 6.44128813572427 |
| H | 13.49619463299158 | 7.35590743901582  | 6.67786581441437 |
| H | 12.97962666339748 | 5.66591864121860  | 6.53841811503891 |
| H | 12.37498127573185 | 6.87369202237103  | 5.39210526106114 |

Se 7.00250292660400 11.30511944992228 5.32971727738705  
Se 2.74500479232008 2.19352596047688 5.25432774167046

### 5.6. 1-Hexene

$E = -236.265093679682$

$E_{ZPE} = 0.16248643$

$E_T = 0.00799746$

$E_S = -0.04057872$

|   |                   |                  |                   |
|---|-------------------|------------------|-------------------|
| C | -5.69009835057238 | 0.90689948263830 | 0.33079839780943  |
| H | -5.35885615609771 | 0.26507473116964 | 1.14573137954423  |
| H | -6.76314400060383 | 1.02910521231955 | 0.20651076222321  |
| C | -4.81558171566253 | 1.51174994681208 | -0.47726615930880 |
| H | -5.19001479303475 | 2.14970008182438 | -1.28064617489499 |
| C | -3.32216328022187 | 1.40836285744762 | -0.36716481412739 |
| H | -2.91789207196854 | 0.99531153705298 | -1.30373787998114 |
| H | -3.05662735615058 | 0.70880356264658 | 0.43567708115025  |
| C | -2.65042823142816 | 2.77096053420846 | -0.11263055688819 |
| H | -3.02842725072187 | 3.18785006174475 | 0.83082828866939  |
| H | -2.94361423709547 | 3.47318468797234 | -0.90561208903649 |
| C | -1.12170572045561 | 2.67695972179767 | -0.05559244428268 |
| H | -0.75227727292685 | 2.25696736239681 | -1.00119305512334 |
| H | -0.83358605377120 | 1.96853702582698 | 0.73307312435313  |
| C | -0.45473549946595 | 4.03199488988521 | 0.20201278966999  |
| H | -0.78876361640233 | 4.45687742097103 | 1.15619441167912  |
| H | 0.63644880535100  | 3.93938680512156 | 0.23805059250916  |
| H | -0.70663319877133 | 4.74837407816403 | -0.58913365396490 |

### 5.7. Transition state Me-2b-TS

$E = -6333.3954898991$

$E_{ZPE} = 0.37924521$

$E_T = 0.02828747$

$E_S = -0.0852108$

$\text{imf} = -293.61 \text{ cm}^{-1}$

|   |                   |                   |                   |
|---|-------------------|-------------------|-------------------|
| C | -0.52286878019228 | -1.79668789705918 | -0.27456195410037 |
| C | -1.09328457859622 | -0.86703986038526 | -1.13278330559859 |
| C | 1.06546632659667  | 0.66160900133197  | -0.90265657445049 |
| C | 1.65366655730010  | -0.29083977491280 | -0.07999341559233 |
| P | -0.65479230360715 | 0.84150525676970  | -1.26433517116014 |
| P | 0.82932666866203  | -1.55951446756529 | 0.83630306092808  |
| N | -1.37836439807218 | -2.89352408900244 | -0.24934250020790 |
| N | -2.27699351645801 | -1.42815537084012 | -1.60040392108465 |
| N | 2.04616482321637  | 1.60814690495181  | -1.18636101658201 |
| N | 2.97365478626658  | 0.10791590661719  | 0.10669159269772  |
| C | -3.20522677068588 | -0.79197870477716 | -2.53073402908657 |
| H | -2.66107392249879 | -0.02150007791977 | -3.07984793101946 |
| H | -3.58919512643672 | -1.55105628510562 | -3.21401686820584 |
| H | -4.03800471215525 | -0.34070517428377 | -1.98433145231743 |
| C | -1.15405569154843 | -4.10598676751852 | 0.53109659442347  |
| H | -0.09955005930074 | -4.38101581112493 | 0.45613390166952  |

|    |                   |                   |                   |
|----|-------------------|-------------------|-------------------|
| H  | -1.41723729843485 | -3.93393591536377 | 1.57881829560188  |
| H  | -1.78737380737367 | -4.89135719828233 | 0.11654676815731  |
| C  | 3.99498146903365  | -0.62798447703474 | 0.84760676299314  |
| H  | 3.55368034818067  | -1.56569338061108 | 1.18914054495523  |
| H  | 4.84372929534217  | -0.82731141308412 | 0.18984068255515  |
| H  | 4.33223265853432  | -0.03827648174537 | 1.70220706006989  |
| C  | 1.85311777385022  | 2.79222775884541  | -2.01658825018590 |
| H  | 2.82675798747807  | 3.09130000808225  | -2.40727744958764 |
| H  | 1.17197056363274  | 2.53738886383343  | -2.83130021471444 |
| H  | 1.43018605290323  | 3.60714034899628  | -1.42202623412010 |
| C  | 3.22138943925723  | 1.26926189349252  | -0.57500039996512 |
| C  | -2.45708929814979 | -2.67448909126925 | -1.06434833950173 |
| C  | -0.47059233522216 | 0.41985811233321  | 1.96962922883739  |
| C  | -1.24743081096013 | 1.11578238075761  | 1.03664151368435  |
| H  | -0.93578501446789 | -0.40424806613543 | 2.50546121322838  |
| H  | -1.06246223351988 | 2.18337435860990  | 0.93140076471401  |
| H  | -2.27298294570060 | 0.80407783169392  | 0.86020677456190  |
| Se | -3.85881292335025 | -3.82146681085881 | -1.40070072967681 |
| Se | 4.83043777547728  | 2.16035087698713  | -0.65446763854748 |
| C  | 0.68733848879913  | 1.12504143844093  | 2.63622731344168  |
| H  | 0.27175453585503  | 1.96307577100807  | 3.21799322375075  |
| H  | 1.31720925535356  | 1.59372512673414  | 1.86776973174186  |
| C  | 1.54282266604045  | 0.26997441633448  | 3.57038726791882  |
| H  | 0.90495723074248  | -0.16286342214306 | 4.35348801396047  |
| H  | 1.96060652462145  | -0.58225339797667 | 3.01764842204292  |
| C  | 2.68449366509128  | 1.06426222042768  | 4.21250790543148  |
| H  | 3.29312546839119  | 1.51900625299687  | 3.41902042159539  |
| H  | 2.26372940978528  | 1.89521798225322  | 4.79478413549397  |
| C  | 3.57289411025647  | 0.20001592632103  | 5.11221239636501  |
| H  | 4.38062548653086  | 0.78977319046695  | 5.55906979716417  |
| H  | 2.98932987007877  | -0.24553947250451 | 5.92668486952714  |
| H  | 4.02812728945337  | -0.61770842078166 | 4.54075913819368  |

### 5.8. Se-methylated imidazolium salt [Me-3a]<sup>2+</sup>

$E = -6413.039854786058$

$E_{ZPE} = 0.45768220$

$E_T = 0.03276212$

$E_S = -0.09379375$

|   |                  |                  |                  |
|---|------------------|------------------|------------------|
| P | 7.42926122773285 | 5.65380328550391 | 5.72156151436226 |
| P | 5.10311624483394 | 6.64609881541212 | 7.96076172401896 |
| N | 7.24600946076204 | 8.49248459035661 | 5.16689108191312 |
| N | 5.78197620387660 | 9.14233990404116 | 6.66204883118551 |
| N | 3.73266976831893 | 4.48303738072227 | 6.60445342406002 |
| N | 5.25299149499797 | 3.83030687082284 | 5.16758485803462 |
| C | 6.81714031623791 | 7.36564302438838 | 5.83592457868433 |
| C | 6.61321389578071 | 9.57623032062059 | 5.68343568075273 |
| C | 5.89292668566888 | 7.76972905161835 | 6.76633984737995 |
| C | 4.81373509523805 | 5.32930131768067 | 6.73823920879289 |
| C | 4.00835433833329 | 3.56871912688130 | 5.64078484137665 |
| C | 5.77160722951194 | 4.91221989444106 | 5.84949992733259 |
| C | 8.22760897772877 | 8.52172907685021 | 4.07543433753927 |

|    |                   |                   |                   |
|----|-------------------|-------------------|-------------------|
| C  | 4.88997140199117  | 9.99749716888985  | 7.45920511489565  |
| C  | 2.47935529949354  | 4.57550377773502  | 7.36737047102667  |
| C  | 5.93598821864706  | 3.07798013775983  | 4.10759348368553  |
| C  | 7.83986176356670  | 5.54371621175056  | 7.57579949405350  |
| C  | 6.72105646588909  | 5.87361658174984  | 8.60185616379977  |
| C  | 9.09788080756397  | 6.39367044492997  | 7.85101063315505  |
| C  | 10.31217382560284 | 6.03669901539266  | 6.99098420311460  |
| C  | 6.37165024372843  | 4.63382409592663  | 9.45091620554819  |
| C  | 5.43683652944466  | 4.91192958728943  | 10.63029075865557 |
| H  | 8.00811507803816  | 9.38389016799039  | 3.44435177029306  |
| H  | 8.12715616720886  | 7.59799395567785  | 3.50619012772996  |
| H  | 9.23466648833034  | 8.59963960496973  | 4.48947723781143  |
| H  | 4.61382405211999  | 9.44517416176283  | 8.35671467118726  |
| H  | 3.99835931521176  | 10.23733565190355 | 6.87702915857381  |
| H  | 5.42493531500776  | 10.91047037045826 | 7.72085159297925  |
| H  | 1.81121988620810  | 5.28924569816348  | 6.88162520112197  |
| H  | 2.72056534488700  | 4.91030200506826  | 8.37598614327498  |
| H  | 2.02110170892892  | 3.58739631310965  | 7.39051051600803  |
| H  | 5.17590785919756  | 2.63467307481273  | 3.46313600657151  |
| H  | 6.55608064011162  | 2.29812390523563  | 4.55394340192600  |
| H  | 6.55594912084378  | 3.77419797886068  | 3.54328874089150  |
| H  | 8.09800519692222  | 4.48266334639975  | 7.68786041168682  |
| H  | 7.09836665847186  | 6.66192865992949  | 9.26651020714416  |
| H  | 8.84127969339143  | 7.45433170204672  | 7.72878120131156  |
| H  | 9.34759836469987  | 6.25731637095895  | 8.91049436133765  |
| H  | 11.18402780029336 | 6.61747357628588  | 7.30793931899495  |
| H  | 10.13834467432751 | 6.24876305661574  | 5.92987854408473  |
| H  | 10.55833151758510 | 4.97306957955663  | 7.08417407422296  |
| H  | 5.94380004375951  | 3.86236705622422  | 8.79659057220457  |
| H  | 7.31910983309967  | 4.22780256621634  | 9.82605034655046  |
| H  | 5.30745079430940  | 4.00689012214864  | 11.23200838522050 |
| H  | 4.44389715470928  | 5.23658139737755  | 10.29930176768847 |
| H  | 5.84767239929798  | 5.69559766644432  | 11.27652987871748 |
| Se | 2.81882762185717  | 2.23516322947405  | 5.02096391654629  |
| Se | 6.76895856880818  | 11.36794700008713 | 5.10452218853043  |
| C  | 8.65314613741221  | 11.66334440916905 | 5.62400823237657  |
| H  | 9.31276980376973  | 11.05464858392735 | 5.00841489016781  |
| H  | 8.81536986391116  | 12.72407376207132 | 5.42542439816570  |
| H  | 8.76212934873181  | 11.44740721881267 | 6.68530914537255  |
| C  | 3.81077854879017  | 0.65411356183543  | 5.67239591619702  |
| H  | 3.15227752136111  | -0.18263238100742 | 5.43259154001399  |
| H  | 4.75672096341669  | 0.56092369592906  | 5.14216635508106  |
| H  | 3.94717102003082  | 0.74380325072024  | 6.74859339664756  |

### 5.9. Imidazolium salt [Me-4a]<sup>2+</sup>

$$E = -1528.889624617097$$

$$E_{ZPE} = 0.40448133$$

$$E_T = 0.02408162$$

$$E_S = -0.07456163$$

|   |                  |                  |                  |
|---|------------------|------------------|------------------|
| P | 6.93612965543109 | 5.23745943729860 | 5.78000781883852 |
| P | 5.57233161174581 | 7.15453868260381 | 8.21024450858014 |

|   |                   |                   |                   |
|---|-------------------|-------------------|-------------------|
| N | 7.84033025179025  | 7.89205120493268  | 5.02594363843423  |
| N | 6.98420607236881  | 9.12057688773433  | 6.61838461175763  |
| N | 3.25206662447911  | 5.72378565908866  | 7.20519215591510  |
| N | 4.14415169967846  | 4.46413121182811  | 5.65724899527436  |
| C | 7.09587676969756  | 7.05050714292398  | 5.83339427833488  |
| C | 7.75343759459670  | 9.13493376532487  | 5.52119310831278  |
| C | 6.56124603408305  | 7.81933483590349  | 6.83509676689322  |
| C | 4.59688131160789  | 6.04338728239410  | 7.14549078346254  |
| C | 3.00617258049622  | 4.77054063579891  | 6.29509256530556  |
| C | 5.15870396455467  | 5.25159435838151  | 6.17676094201345  |
| C | 8.60614047049704  | 7.50187795850194  | 3.83137263729621  |
| C | 6.65292956368914  | 10.29683509463021 | 7.43844794939761  |
| C | 2.25372103126870  | 6.31663669109436  | 8.10945254287920  |
| C | 4.27453926161406  | 3.46182876571299  | 4.58722047664341  |
| C | 7.53240030826872  | 5.00598297694695  | 7.57278269864677  |
| C | 6.81632067016938  | 5.79887180893132  | 8.70071642821196  |
| C | 9.05640282485957  | 5.24346500976283  | 7.62113529027480  |
| C | 9.87120428911539  | 4.36657069613689  | 6.66754897219275  |
| C | 6.13565415446416  | 4.83383388698787  | 9.69366893222634  |
| C | 5.53851990352786  | 5.50391703268735  | 10.93284087910533 |
| H | 9.06262604213655  | 8.39731284065043  | 3.41167781930270  |
| H | 7.92567116374666  | 7.04935464919118  | 3.10887851164607  |
| H | 9.37649496736964  | 6.78697205921229  | 4.12390901954478  |
| H | 5.56832413452625  | 10.40868142418983 | 7.47160798925895  |
| H | 7.10942616688375  | 11.17176039372319 | 6.97730582571708  |
| H | 7.04822830879703  | 10.15118171877691 | 8.44481537911708  |
| H | 2.20520119362436  | 7.39080303516936  | 7.92552881109016  |
| H | 2.55272617710815  | 6.12287008701527  | 9.14063595092029  |
| H | 1.28983203974391  | 5.85334970507317  | 7.90312950054414  |
| H | 3.28836989341508  | 3.04321411603051  | 4.39076106853520  |
| H | 4.95836868132493  | 2.67815978120406  | 4.91649120277932  |
| H | 4.66379245453403  | 3.95051852263836  | 3.69293036901664  |
| H | 7.33684818178209  | 3.93851940725404  | 7.73806281678519  |
| H | 7.57689040469112  | 6.38011646160362  | 9.23826693316277  |
| H | 9.25731810773947  | 6.30602706392914  | 7.43015933769745  |
| H | 9.37454582166616  | 5.05202496276723  | 8.65340857884183  |
| H | 10.94181982840569 | 4.52849890672141  | 6.82705467679117  |
| H | 9.65314881920904  | 4.59082455464509  | 5.61717700976421  |
| H | 9.65773241887393  | 3.30500128467148  | 6.83508277153237  |
| H | 5.36544279972302  | 4.26098521516416  | 9.16028516317335  |
| H | 6.89849867632634  | 4.10852906736805  | 10.00260945021332 |
| H | 5.16294048544128  | 4.74631020753600  | 11.62775018296515 |
| H | 4.70269937641832  | 6.16559403542026  | 10.67810829137198 |
| H | 6.29284446508581  | 6.10253882121839  | 11.45559411926302 |
| H | 8.22095488753183  | 10.01082890412968 | 5.09652435990594  |
| H | 2.04118785589184  | 4.32656174909100  | 6.10070788106289  |

### 5.10. 1,4-Diphosphinine bis(imidazolium) salt Me-10

$$E = -1292.58199919564$$

$$E_{ZPE} = 0.2383914$$

$$E_T = 0.02452739$$

$$E_S = -0.05945547$$

|   |                    |                   |                   |
|---|--------------------|-------------------|-------------------|
| C | -6.60694454009715  | -6.77380451356824 | -0.55924848141760 |
| C | -7.00010433918370  | -5.48892586076798 | -1.01040141042677 |
| C | -4.60945654255116  | -4.58941897216928 | -0.53406441166126 |
| C | -4.21628797100843  | -5.87430134479169 | -0.08292867823547 |
| P | -6.12866708510565  | -3.98287887658266 | -1.14164789507881 |
| P | -5.08769188073346  | -7.38038076629193 | 0.04819206524757  |
| N | -7.73642354461580  | -7.58772392700137 | -0.68421158394823 |
| N | -8.34293365149731  | -5.60574859513886 | -1.38050800844144 |
| N | -3.48004843828219  | -3.77543693135598 | -0.40887612974348 |
| N | -2.87350776098095  | -5.75742974196338 | 0.28734574779098  |
| C | -9.18019531251430  | -4.52108689194563 | -1.91359845137435 |
| H | -10.17065071934334 | -4.92535584336807 | -2.11677519971881 |
| H | -9.24292472214378  | -3.72396330668987 | -1.16990781852073 |
| H | -8.72921187401193  | -4.14624090159223 | -2.83464016868462 |
| C | -7.80510116843384  | -9.01347175684341 | -0.33113695750033 |
| H | -7.58005205372639  | -9.12510859248132 | 0.73148732850962  |
| H | -7.07842567067648  | -9.56231657040898 | -0.93348955476240 |
| H | -8.81308063753424  | -9.36751507122863 | -0.54252194195777 |
| C | -2.03629408270536  | -6.84202096852517 | 0.82066257190800  |
| H | -2.48681098134117  | -7.21608332840027 | 1.74225270884565  |
| H | -1.04555257131487  | -6.43797024471653 | 1.02287751809450  |
| H | -1.97432825232492  | -7.63966687768899 | 0.07747030605480  |
| C | -3.41140141965578  | -2.34966558045472 | -0.76186118036076 |
| H | -2.40343747530532  | -1.99560785205503 | -0.55042704677187 |
| H | -4.13811126141170  | -1.80087707328869 | -0.15949891155103 |
| H | -3.63641994352600  | -2.23797218234437 | -1.82448603779597 |
| C | -2.47552576687784  | -4.50241649354154 | 0.07986058807335  |
| C | -8.74096995707209  | -6.86071784125392 | -1.17286221811763 |
| H | -9.73565942443404  | -7.23434689524531 | -1.37297302817023 |
| H | -1.48088095159057  | -4.12874619829571 | 0.28011627971510  |

### 5.11. Transition state Me-4a-TS

$E = -1528.84068709559$

$E_{ZPE} = 0.40243271$

$E_T = 0.02475636$

$E_S = -0.07639928$

$\text{imf} = -139.65 \text{ cm}^{-1}$

|   |                   |                   |                   |
|---|-------------------|-------------------|-------------------|
| C | -0.42615849057393 | -1.62137991292223 | -0.11031072006584 |
| C | -1.02316458029262 | -0.81841830672733 | -1.08559212652584 |
| C | 1.05729875071408  | 0.77073334915987  | -1.05791879376905 |
| C | 1.69304188273687  | -0.08711681529722 | -0.15678624806325 |
| P | -0.64753973899940 | 0.85677134781542  | -1.49696746126497 |
| P | 0.95988021209041  | -1.27434913743748 | 0.92286788024128  |
| N | -1.21297262459431 | -2.76831881652244 | -0.00685951719758 |
| N | -2.13922346154970 | -1.52120913021255 | -1.54349408216699 |
| N | 2.02570024792182  | 1.67616130397031  | -1.49107016926890 |
| N | 3.02579632766764  | 0.32464784212277  | -0.09587946353508 |
| C | -3.04996029511638 | -1.09914032132034 | -2.61919626694684 |
| H | -3.62952125058750 | -0.23696910588067 | -2.28675346545105 |
| H | -2.45395764011746 | -0.83926636728028 | -3.49569742184372 |
| H | -3.71545679636111 | -1.93103420708236 | -2.84693140606541 |



|   |                   |                   |                   |
|---|-------------------|-------------------|-------------------|
| C | -0.96380357791389 | -3.90329334330763 | 0.89315144349498  |
| H | -1.05865740860117 | -3.56688985684690 | 1.92737656300926  |
| H | -1.70154490088431 | -4.67588387555182 | 0.68041302047108  |
| H | 0.04425625506375  | -4.28041735410143 | 0.70992428887559  |
| C | 4.09863394099139  | -0.32287546293866 | 0.67488312767120  |
| H | 3.87045528906582  | -0.25321019344847 | 1.73899866438616  |
| H | 4.16493401669552  | -1.36907027392670 | 0.37048574559349  |
| H | 5.03243445385565  | 0.19481731792882  | 0.45923313838619  |
| C | 1.81001064172172  | 2.77446870495414  | -2.44334200265726 |
| H | 1.39891665326415  | 2.36243745596462  | -3.36693457643973 |
| H | 1.11249175651724  | 3.49237602375539  | -2.00734896183978 |
| H | 2.76952202069237  | 3.25258792480723  | -2.63549179794125 |
| C | 3.18878425122565  | 1.36991589272437  | -0.91200735998104 |
| C | -2.21395471149370 | -2.68201811098118 | -0.88594982316238 |
| H | -0.67443259218440 | 0.06748001631344  | 2.62944588822875  |
| C | -0.35167971649729 | 0.86426558791728  | 1.95843709750067  |
| C | -1.29271832736927 | 1.36858486706360  | 1.08316645687786  |
| C | 0.85984648456743  | 1.66175016290461  | 2.38061075022039  |
| H | -1.12491354359369 | 2.37712497474008  | 0.70373642095751  |
| C | -2.71410590202881 | 0.85779037660891  | 1.05053724462009  |
| H | 0.50672395716726  | 2.65117377807111  | 2.70272437658347  |
| H | 1.50747633343704  | 1.86079688717130  | 1.51784213930401  |
| H | -3.09660557908240 | 0.89318758008982  | 2.08023064575066  |
| H | -2.73440249396068 | -0.20461022872805 | 0.77800745792458  |
| C | 1.65151113780059  | 1.01871705853190  | 3.52014019692245  |
| H | 2.51202000287164  | 1.63669802941500  | 3.79282276251246  |
| H | 1.02016195299095  | 0.90089383101569  | 4.40724749545188  |
| H | 2.02004140623703  | 0.02371751466340  | 3.24471900123631  |
| C | -3.64268109120776 | 1.67415519955545  | 0.15035742853593  |
| H | -4.66301612901655 | 1.28140546232983  | 0.18717740500185  |
| H | -3.66682883239486 | 2.72027802462417  | 0.47364007561861  |
| H | -3.31073472764124 | 1.66258810462385  | -0.89416088352280 |
| H | -2.95864536051055 | -3.44536266876426 | -1.05940312482615 |
| H | 4.12534179727698  | 1.87820887043558  | -1.09048104284185 |

## 5.12. Bis(NHC) Me-5a

$E = -1527.922647933374$

$E_{ZPE} = 0.37774859$

$E_T = 0.02452739$

$E_S = -0.07552661$

|   |                  |                  |                  |
|---|------------------|------------------|------------------|
| P | 7.35948585359040 | 5.64679510336920 | 5.85609456316249 |
| P | 5.08871615612200 | 6.68523354082703 | 8.06050493436604 |
| N | 7.20329182103525 | 8.49817450591914 | 5.24745295329980 |
| N | 5.77297095823725 | 9.16841213590438 | 6.69548104402762 |
| N | 3.71388871089242 | 4.43456122982387 | 6.80885542862453 |
| N | 5.19142698627704 | 3.74909614757939 | 5.41667570093473 |
| C | 6.78054496542208 | 7.36471275449580 | 5.92777517623523 |
| C | 6.58850645032551 | 9.64094647853520 | 5.69778736106680 |
| C | 5.86992407613064 | 7.79103812583091 | 6.85461809496979 |
| C | 4.77746729435637 | 5.32125589888716 | 6.90501208829086 |
| C | 3.93663886189192 | 3.44523980344302 | 5.88258835459879 |

|   |                   |                   |                   |
|---|-------------------|-------------------|-------------------|
| C | 5.72330266264579  | 4.88242387254854  | 6.02029118848573  |
| C | 8.18160264854458  | 8.49142179733646  | 4.16232800631161  |
| C | 4.89830699268787  | 10.03153318555756 | 7.48577807930821  |
| C | 2.48527092385163  | 4.53284354756178  | 7.59331848775134  |
| C | 5.87190762154131  | 2.96463778119049  | 4.38909919369065  |
| C | 7.81363513013002  | 5.57131478660269  | 7.70796065799866  |
| C | 6.70664620528718  | 5.93012593851411  | 8.73598542708334  |
| C | 9.07379269165839  | 6.42452200139800  | 7.95549002986499  |
| C | 10.28448767260239 | 6.04456547215210  | 7.09947771200913  |
| C | 6.36537071832326  | 4.71098409944322  | 9.61501400296317  |
| C | 5.42492710759018  | 5.01024011093074  | 10.78528694901153 |
| H | 8.28600773458019  | 9.51627533161302  | 3.80718593079681  |
| H | 7.83534925196381  | 7.84855707026672  | 3.34844210052577  |
| H | 9.14572246935859  | 8.12427598692819  | 4.52501667943907  |
| H | 3.85883822861001  | 9.70795350783602  | 7.38352197642844  |
| H | 5.01032520778000  | 11.04727744603075 | 7.10736740493707  |
| H | 5.18375049631910  | 9.99534424818842  | 8.54086204953974  |
| H | 1.98426938715788  | 5.48387656763011  | 7.39249721311344  |
| H | 2.71364288817094  | 4.46568143340789  | 8.66063894340547  |
| H | 1.84079761891843  | 3.70450914327983  | 7.30010180400446  |
| H | 5.20224925965071  | 2.15654486912426  | 4.09568100025632  |
| H | 6.80297174752069  | 2.54913943311644  | 4.78470180026584  |
| H | 6.09818253330216  | 3.59370886016697  | 3.52378620173299  |
| H | 8.07268541538727  | 4.51318452999783  | 7.84744870384336  |
| H | 7.09365883903282  | 6.73080517547303  | 9.38073655016413  |
| H | 8.81699360560251  | 7.48052191102364  | 7.79915302680360  |
| H | 9.33438860836910  | 6.32362139920704  | 9.01732976539077  |
| H | 11.15970414650718 | 6.63506320492274  | 7.39062193531636  |
| H | 10.09856660361288 | 6.22264578633041  | 6.03467117338223  |
| H | 10.53298466477132 | 4.98383630282987  | 7.22198645625887  |
| H | 5.93820291048224  | 3.92611605426596  | 8.97688080602818  |
| H | 7.31133680561653  | 4.31213894761077  | 10.00433090093561 |
| H | 5.29970523046590  | 4.12146851440789  | 11.41287190837235 |
| H | 4.43253350593798  | 5.31934413786202  | 10.43935328568199 |
| H | 5.82612033173785  | 5.81563182062895  | 11.41163694932152 |

### 5.13. 1,4-Diphosphinine bis(NHC) 11

$E = -1291.63449637021$

$E_{ZPE} = 0.21141758$

$E_T = 0.016036$

$E_S = -0.05881653$

|   |                   |                   |                   |
|---|-------------------|-------------------|-------------------|
| C | -6.64086335742516 | -6.76536869380257 | -0.57391999338451 |
| C | -7.02256952600040 | -5.46852957049974 | -0.99078536871886 |
| C | -4.58525114248717 | -4.58887608016498 | -0.48811179929905 |
| C | -4.20361572482122 | -5.88566119658256 | -0.07101036883099 |
| P | -6.11253521953128 | -3.98176474167471 | -1.07557372918042 |
| P | -5.11353105521129 | -7.37251964122356 | 0.01338342564425  |
| N | -7.78738817184910 | -7.54711887317104 | -0.72344720989348 |
| N | -8.36498560210227 | -5.58456557599199 | -1.35467855956516 |
| N | -3.43874654896541 | -3.80711024411983 | -0.33851018627329 |
| N | -2.86131757070249 | -5.76953249529376 | 0.29328210621154  |

|   |                    |                   |                   |
|---|--------------------|-------------------|-------------------|
| C | -9.15976351077456  | -4.46524898567058 | -1.84967529608347 |
| H | -9.20372506318590  | -3.67309756208004 | -1.09548550480179 |
| H | -8.71448994744352  | -4.06421827976202 | -2.76570906093525 |
| H | -10.16220117017392 | -4.83833453111036 | -2.05590352101232 |
| C | -7.83406176180321  | -8.96932511183855 | -0.39942509862407 |
| H | -7.11171153562390  | -9.51817157914899 | -1.01186938637263 |
| H | -7.59692175236354  | -9.12108950106447 | 0.65834238385137  |
| H | -8.84316861390391  | -9.32202295133692 | -0.60888570736886 |
| C | -2.06651449466225  | -6.88888273768744 | 0.78815168420276  |
| H | -2.01937378263963  | -7.67946687966841 | 0.03250250678926  |
| H | -1.06514978287964  | -6.51495709865621 | 0.99803991227712  |
| H | -2.51392467891263  | -7.29231845301248 | 1.70208051694472  |
| C | -3.39210769179051  | -2.38487427984614 | -0.66241133712719 |
| H | -2.38257840272753  | -2.03252740447764 | -0.45440517453954 |
| H | -3.63075892935769  | -2.23295226200045 | -1.71981378481008 |
| H | -4.11337731844573  | -1.83584126383631 | -0.04885770186784 |
| C | -2.36318973450611  | -4.50462892644812 | 0.13959750521361  |
| C | -8.86307790970995  | -6.84949507983008 | -1.20110125244582 |

#### 5.14. Transition state Me-5a-TS

$E = -1527.88158508944$

$E_{ZPE} = 0.37475281$

$E_T = 0.02472331$

$E_S = -0.07596483$

$\text{imf} = -218.93 \text{ cm}^{-1}$

|   |                   |                   |                   |
|---|-------------------|-------------------|-------------------|
| C | -0.43523771041973 | -1.63766066612687 | -0.10066734641844 |
| C | -1.04138103174645 | -0.84834834551541 | -1.06803550899478 |
| C | 1.06453665276813  | 0.78628020676859  | -1.06430696198739 |
| C | 1.70653135957251  | -0.05253199734332 | -0.16381218727812 |
| P | -0.66859013631270 | 0.84946319593699  | -1.41846338618003 |
| P | 0.92081978038575  | -1.19007446953913 | 0.94698632855525  |
| N | -1.22015583023773 | -2.78825420198188 | -0.00700495065076 |
| N | -2.15204669521503 | -1.57425146322090 | -1.50314388988049 |
| N | 2.03938552902064  | 1.68300233190835  | -1.50494476434039 |
| N | 3.03207025278952  | 0.38521780801978  | -0.12279216546358 |
| C | -3.05671059475374 | -1.12688982086026 | -2.55910424077135 |
| H | -3.58411677770097 | -0.22008159323225 | -2.25211556784433 |
| H | -2.49092812560542 | -0.92176969426951 | -3.47270623594729 |
| H | -3.77546135190335 | -1.92643304690932 | -2.73675020638969 |
| C | -0.92882669142672 | -3.89637609240814 | 0.89770003490854  |
| H | -1.00541744331343 | -3.56726032609343 | 1.93837960539163  |
| H | -1.65992887945619 | -4.68103959607237 | 0.70480893950200  |
| H | 0.08245472414890  | -4.27184280261889 | 0.71427920775128  |
| C | 4.07885801686985  | -0.24803108333154 | 0.67538625023537  |
| H | 3.87588080450281  | -0.12450429686642 | 1.74237036782521  |
| H | 4.13140623861666  | -1.31523586287809 | 0.44096100355545  |
| H | 5.02148469814658  | 0.23694240110917  | 0.42303901000542  |
| C | 1.78402641195825  | 2.74799183244343  | -2.47028427823179 |
| H | 1.36358840095508  | 2.32715605794756  | -3.38858651203548 |
| H | 1.08028478006188  | 3.47592306592817  | -2.05513970780256 |

|   |                   |                   |                   |
|---|-------------------|-------------------|-------------------|
| H | 2.73511001024636  | 3.23553314139686  | -2.68295826468414 |
| H | 3.27145771975994  | 1.44336232951190  | -0.95977324661815 |
| C | -2.27362190091621 | -2.78891192632174 | -0.88067487434213 |
| H | -0.74986380891187 | 0.05563744459441  | 2.59201795283255  |
| C | -0.32232969353962 | 0.77171363163732  | 1.88922001614747  |
| C | -1.23043437994395 | 1.34390053161740  | 0.97938477595530  |
| C | 0.84508702785397  | 1.59000727966004  | 2.40660292644966  |
| H | -1.04344058788774 | 2.38516658750939  | 0.71527600673099  |
| C | -2.68518608400445 | 0.91577069813299  | 1.00087494256390  |
| H | 0.44795349153501  | 2.55041670581616  | 2.76642858559936  |
| H | 1.52152157400550  | 1.84174990137443  | 1.58051525967188  |
| H | -3.04062634371926 | 0.99527730106352  | 2.03872988487155  |
| H | -2.76536680866900 | -0.14762770319311 | 0.74381029842798  |
| C | 1.61468535485173  | 0.91966780094687  | 3.54641215747529  |
| H | 2.44177786152730  | 1.55237816164207  | 3.88404957145234  |
| H | 0.95442019061400  | 0.73608403575544  | 4.40177848429344  |
| H | 2.02892549010852  | -0.04593379786896 | 3.23670377288399  |
| C | -3.59761791402016 | 1.75672493345848  | 0.10633702539504  |
| H | -4.63449098884610 | 1.41251520949078  | 0.17591164404551  |
| H | -3.56702866400719 | 2.81034553723962  | 0.40678767725762  |
| H | -3.29175792774186 | 1.70513065574184  | -0.94428743392318 |

### 5.15. BCl<sub>3</sub>-bis(NHC) adduct Me-6a

$E = -4341.63837446506$

$E_{ZPE} = 0.40004788$

$E_T = 0.03503724$

$E_S = -0.09767531$

|   |                  |                   |                   |
|---|------------------|-------------------|-------------------|
| P | 6.92985487138357 | 5.22391849782558  | 5.77344789468587  |
| P | 5.57993653570549 | 7.14797240909333  | 8.17263444110973  |
| N | 7.86009481147842 | 7.86576850083367  | 5.00212726265568  |
| N | 7.01687546888365 | 9.09329197502479  | 6.58901739126232  |
| N | 3.26085519928267 | 5.71186135416027  | 7.18996940071912  |
| N | 4.14008739234719 | 4.43858683248939  | 5.65959743176713  |
| C | 7.10266146491263 | 7.03316982649405  | 5.80505359699447  |
| C | 7.81231214597986 | 9.13804465741093  | 5.48482180688108  |
| C | 6.57802030422758 | 7.80299541839784  | 6.80402551373782  |
| C | 4.59911970760443 | 6.03218523597301  | 7.12333145991674  |
| C | 2.97110056751779 | 4.72835773970533  | 6.29237304934766  |
| C | 5.15541757318949 | 5.23225973951796  | 6.16557454171925  |
| C | 8.55938439918025 | 7.37303264126039  | 3.80381480519738  |
| C | 6.64487445747521 | 10.22307020597991 | 7.45322052415536  |
| C | 2.32564501879030 | 6.35910252426790  | 8.12135510018005  |
| C | 4.36749494773319 | 3.46946266946700  | 4.57449986360936  |
| C | 7.54528074166193 | 5.00987802958128  | 7.56095282295024  |
| C | 6.80629068889471 | 5.78494445363383  | 8.68642444687852  |
| C | 9.05947615754279 | 5.30268458169048  | 7.60166442649788  |
| C | 9.89857936270643 | 4.47590598053299  | 6.62457622323983  |
| C | 6.09542351962356 | 4.80959789449846  | 9.64601978991086  |
| C | 5.46050862622716 | 5.46813952778388  | 10.87275434843963 |
| H | 8.24204546144593 | 7.94155586540270  | 2.93180371526111  |
| H | 8.28212319667138 | 6.32461178597254  | 3.68872370483326  |

|    |                   |                   |                   |
|----|-------------------|-------------------|-------------------|
| H  | 9.63623312783550  | 7.46309792075532  | 3.93802697113118  |
| H  | 5.67258768907867  | 9.99186781601545  | 7.89001532269284  |
| H  | 6.58163686569656  | 11.12748509729799 | 6.85237654026731  |
| H  | 7.39089014870406  | 10.34497937283881 | 8.23965154018698  |
| H  | 2.72234171950108  | 7.35052231057192  | 8.34277571120876  |
| H  | 2.25297698520635  | 5.76884506519267  | 9.03548949871832  |
| H  | 1.34906460107976  | 6.44016092433856  | 7.64901539508092  |
| H  | 3.70395809746172  | 3.68841743354068  | 3.74011683237903  |
| H  | 4.19134624114216  | 2.45805531317225  | 4.93722589523911  |
| H  | 5.40764122158773  | 3.58189065365493  | 4.26669127612834  |
| H  | 7.38909825865474  | 3.93713733929494  | 7.73465359578627  |
| H  | 7.55735195543147  | 6.35159349641328  | 9.25241300370150  |
| H  | 9.21845916669561  | 6.37467473146496  | 7.42594510919439  |
| H  | 9.39508500045350  | 5.10595358145654  | 8.62768846015091  |
| H  | 10.96450384595225 | 4.66841694606863  | 6.78317483722301  |
| H  | 9.66786897205931  | 4.71921735783608  | 5.58133231881721  |
| H  | 9.71987517990206  | 3.40387954733928  | 6.76581875699585  |
| H  | 5.33960652347614  | 4.24542625085087  | 9.08401038153696  |
| H  | 6.84573545334713  | 4.07803958061725  | 9.97171397802629  |
| H  | 5.05597986872905  | 4.70565090715305  | 11.54606868328021 |
| H  | 4.63906300892393  | 6.13869591453772  | 10.59640496379311 |
| H  | 6.20039738172796  | 6.05657551767391  | 11.42722414911427 |
| B  | 8.49378516841409  | 10.49648653152168 | 4.92844981872054  |
| B  | 1.48666155782307  | 4.11667166289223  | 6.08708272219259  |
| Cl | 9.43973342044877  | 11.30246651689268 | 6.34248278826605  |
| Cl | 7.10133174129238  | 11.62867698106320 | 4.34524617376390  |
| Cl | 9.68220309895731  | 10.24187949702941 | 3.52296412574880  |
| Cl | 0.85738441685907  | 3.53586545381957  | 7.76333857311436  |
| Cl | 0.38951999135310  | 5.50039542229230  | 5.42054563164454  |
| Cl | 1.39951667173901  | 2.67787650940535  | 4.91407338394506  |

### 5.16. CS<sub>2</sub>-bis(NHC) adduct Me-7a

$E = -3198.536145627476$

$E_{ZPE} = 0.39823083$

$E_T = 0.03248970$

$E_S = -0.09342132$

|   |                  |                   |                  |
|---|------------------|-------------------|------------------|
| P | 6.90161190450980 | 5.25257825388020  | 5.76283559863749 |
| P | 5.56921571774576 | 7.17210658828880  | 8.17675761354588 |
| N | 7.85241305792519 | 7.88871553337383  | 5.00633916348226 |
| N | 7.02946313180810 | 9.12375304915591  | 6.61329611742107 |
| N | 3.23628891028023 | 5.73361389641793  | 7.21784366000059 |
| N | 4.11619831660015 | 4.45847674564056  | 5.67352037046518 |
| C | 7.08276024891871 | 7.05931364282330  | 5.80623587348154 |
| C | 7.81174116791427 | 9.14157565529479  | 5.51259816213048 |
| C | 6.56879840845253 | 7.82983140383011  | 6.81350430658511 |
| C | 4.57799391959260 | 6.06802113633987  | 7.12737004606449 |
| C | 2.97175547168313 | 4.75053376076325  | 6.32885822531838 |
| C | 5.13170992456872 | 5.26649746048437  | 6.16641103831338 |
| C | 8.61715525119305 | 7.49731124276202  | 3.81778234669176 |
| C | 6.75276909015848 | 10.29184032310330 | 7.45571534249772 |
| C | 2.25247793443123 | 6.30482799884746  | 8.14327713668405 |

|   |                   |                   |                   |
|---|-------------------|-------------------|-------------------|
| C | 4.24314302755877  | 3.42424181543412  | 4.64140296643521  |
| C | 7.52577681816467  | 5.02809667175144  | 7.54965727641601  |
| C | 6.78662333114151  | 5.79333392260706  | 8.68047183664144  |
| C | 9.03910894986982  | 5.32492541883084  | 7.58710117540660  |
| C | 9.87551167540982  | 4.51188578070811  | 6.59634197126751  |
| C | 6.06497901345023  | 4.81110881688145  | 9.62482493334840  |
| C | 5.41932973350960  | 5.45967615456003  | 10.85129308865391 |
| H | 8.39082997852259  | 8.19400210795584  | 3.00947222378444  |
| H | 8.31411771833292  | 6.48702176170322  | 3.54436500951716  |
| H | 9.68423901806917  | 7.52086792053863  | 4.04807324820772  |
| H | 5.83427821436649  | 10.09753425635856 | 8.00928305473264  |
| H | 6.62765322493800  | 11.16532107737518 | 6.81533862664534  |
| H | 7.58463444697886  | 10.44984689460729 | 8.14521794756750  |
| H | 2.65234797237954  | 7.24772848433794  | 8.51554695978480  |
| H | 2.08611151469501  | 5.61069744846517  | 8.96941813000420  |
| H | 1.31956648373845  | 6.47760643836028  | 7.60556566325638  |
| H | 3.36081861087288  | 3.46018788898500  | 4.00151638154944  |
| H | 4.32577727404273  | 2.44355953564026  | 5.11494884730839  |
| H | 5.13994520009159  | 3.63781145093669  | 4.06030844523209  |
| H | 7.37267018570978  | 3.95379792293547  | 7.71615614125840  |
| H | 7.53822862027164  | 6.34910924633309  | 9.25641556400807  |
| H | 9.19471221317055  | 6.39922460106323  | 7.42318013717751  |
| H | 9.38024849925569  | 5.11717820184955  | 8.60912957878302  |
| H | 10.94167593029918 | 4.70633221127993  | 6.75082994238193  |
| H | 9.63783931288403  | 4.76595428304838  | 5.55717531894359  |
| H | 9.70119704199493  | 3.43771564788118  | 6.72642013372362  |
| H | 5.31356232607128  | 4.25311249760957  | 9.05106283134559  |
| H | 6.81074541075310  | 4.07521841569776  | 9.95118215578950  |
| H | 5.01027398273698  | 4.69161337909647  | 11.51547468021439 |
| H | 4.59901195572949  | 6.13111520702823  | 10.57349914219967 |
| H | 6.15362648990115  | 6.04510027125491  | 11.41627020699425 |
| C | 8.50410891668458  | 10.32712221033436 | 4.95987737581749  |
| C | 1.65674907462709  | 4.10314115468469  | 6.12284651240562  |
| S | 0.77115739835022  | 4.71308483651704  | 4.83195989911608  |
| S | 1.32833361814886  | 2.88795588099271  | 7.23708546423773  |
| S | 9.93760640406655  | 10.70343021913618 | 5.75302036853720  |
| S | 7.71670795742962  | 11.04694327621371 | 3.66132175998694  |

### 5.17. Ph<sub>2</sub>P-bis(NHC) adduct Me-8a

$E = -3139.317756536563$

$E_{ZPE} = 0.74493356$

$E_T = 0.04818169$

$E_S = -0.12269537$

|   |                  |                  |                  |
|---|------------------|------------------|------------------|
| P | 7.38361135423154 | 5.71599154177564 | 5.79458531348403 |
| P | 5.04560835896998 | 6.65744827391425 | 8.04746394921090 |
| N | 7.09963323656389 | 8.54015374077476 | 5.21729986614627 |
| N | 5.63186536235216 | 9.15510453182498 | 6.71466081576548 |
| N | 3.74105702671536 | 4.43870840755009 | 6.72392313238928 |
| N | 5.27245250058802 | 3.80356629572758 | 5.29982982342191 |
| C | 6.71367476842796 | 7.40656485418817 | 5.89461515254798 |
| C | 6.43621109122249 | 9.61470916557359 | 5.71989992506515 |

|   |                   |                   |                   |
|---|-------------------|-------------------|-------------------|
| C | 5.79532161561808  | 7.79294249159613  | 6.83833765988693  |
| C | 4.78988018769140  | 5.32159561713517  | 6.83769401727701  |
| C | 4.03525237033654  | 3.50620087940303  | 5.77946016952294  |
| C | 5.75538125773242  | 4.91818796143541  | 5.95007268956802  |
| C | 8.04494200750770  | 8.56440121412904  | 4.09049248384814  |
| C | 4.73406263146355  | 9.96919516183661  | 7.54682064069196  |
| C | 2.47843760996650  | 4.53062721453531  | 7.47283515567836  |
| C | 5.99258400987527  | 3.07189388664582  | 4.24711097436934  |
| C | 7.81193352589970  | 5.64081428602574  | 7.64755121110115  |
| C | 6.69066526297605  | 5.93763065080746  | 8.68106171804482  |
| C | 9.04222313217176  | 6.53500503526800  | 7.90840621169241  |
| C | 10.27093475036947 | 6.19508766748933  | 7.06235763277268  |
| C | 6.38727593949265  | 4.68900011260227  | 9.53484086459759  |
| C | 5.43420183020335  | 4.93250383115945  | 10.70700559807923 |
| H | 8.38293646750106  | 9.59071188786974  | 3.94933176905456  |
| H | 7.53828935773099  | 8.20709530821899  | 3.19210124190568  |
| H | 8.88698285741743  | 7.91598918809877  | 4.33247672437133  |
| H | 3.92764550541742  | 9.32158494725987  | 7.89110171789620  |
| H | 4.33202402908003  | 10.78199603202368 | 6.94574096186413  |
| H | 5.28816347827605  | 10.36722345625867 | 8.39836731178891  |
| H | 2.70669867569012  | 4.82697140950699  | 8.49643470236756  |
| H | 1.99916603759878  | 3.55192473521860  | 7.45628363460713  |
| H | 1.83445688235937  | 5.27304238562617  | 6.99778495412510  |
| H | 5.27707938586780  | 2.72266388859412  | 3.50553348594644  |
| H | 6.52445221286663  | 2.22621492871848  | 4.68595550364561  |
| H | 6.69779996169690  | 3.76575657767663  | 3.78978842823392  |
| H | 8.10823055096217  | 4.59042935061251  | 7.76681130387906  |
| H | 7.04690274210722  | 6.73912002275183  | 9.34154183313813  |
| H | 8.75599791328104  | 7.58527354320161  | 7.76391667407869  |
| H | 9.29136812463157  | 6.42780479854056  | 8.97141200027626  |
| H | 11.12214588082294 | 6.81164202423380  | 7.36755189861149  |
| H | 10.09642618421414 | 6.37365368395766  | 5.99533735857363  |
| H | 10.55023938597133 | 5.14267208428116  | 7.18476916940215  |
| H | 5.99685056303737  | 3.89625492865327  | 8.88260055422392  |
| H | 7.34903459159979  | 4.32573759363363  | 9.91758173244263  |
| H | 5.34384062247552  | 4.02715684536534  | 11.31534005009487 |
| H | 4.42886689723349  | 5.20718434179991  | 10.36835381803041 |
| H | 5.80333091077610  | 5.73989134209877  | 11.34924896965822 |
| P | 2.93629656313015  | 2.08271250706064  | 5.42914805189983  |
| P | 6.76707466181924  | 11.33152999942951 | 5.16967759830887  |
| C | 2.35642447305454  | 2.46569788641846  | 3.74083188372708  |
| C | 1.47025856161127  | 1.53946187864962  | 3.16542812964975  |
| C | 2.67213164639935  | 3.63758672901158  | 3.04049364010897  |
| C | 0.94386129542547  | 1.76469143023912  | 1.89565764264326  |
| H | 1.19325920181729  | 0.64021883571136  | 3.71049286843066  |
| C | 2.12769989666558  | 3.86711018665545  | 1.77643912128652  |
| H | 3.33379587994799  | 4.38177627215014  | 3.47402652791753  |
| C | 1.27125588057687  | 2.92974122210901  | 1.19836452891333  |
| H | 0.26957792267487  | 1.03536340581571  | 1.45633470853971  |
| H | 2.37861995095545  | 4.77952123118104  | 1.24297479583415  |
| H | 0.85386623932272  | 3.10919024894378  | 0.21190195272204  |
| C | 4.19390576363709  | 0.76548684329421  | 5.22894618792275  |

|   |                  |                   |                   |
|---|------------------|-------------------|-------------------|
| C | 4.93060871539342 | 0.41959650540536  | 6.37271315082055  |
| C | 4.39245303571509 | 0.05798504205897  | 4.03858320069665  |
| C | 5.88023617044111 | -0.59814331497146 | 6.31254609584307  |
| H | 4.76623528633700 | 0.95090112421513  | 7.30785888209383  |
| C | 5.32936402207427 | -0.97451170156691 | 3.98945390981472  |
| H | 3.82907716803596 | 0.31719730685634  | 3.14757018658108  |
| C | 6.07908072690059 | -1.29973853826458 | 5.12091147409370  |
| H | 6.45565556818007 | -0.85116789704768 | 7.19847138346695  |
| H | 5.47798658007298 | -1.51962572304602 | 3.06162775869473  |
| H | 6.81165825434984 | -2.10040068417942 | 5.07701737170683  |
| C | 5.16626656092907 | 11.79615440902820 | 4.42635660081552  |
| C | 5.04926413451244 | 13.11740954560376 | 3.96239674177047  |
| C | 4.11582050453789 | 10.89626007307064 | 4.20198397896405  |
| C | 3.88468989759481 | 13.53745633795067 | 3.32382398989181  |
| H | 5.86932331819839 | 13.81774559899368 | 4.10135341861375  |
| C | 2.95874262615902 | 11.31768095517021 | 3.54602317459168  |
| H | 4.19239886835399 | 9.86240012599197  | 4.52625023673596  |
| C | 2.83679314655443 | 12.63832049063636 | 3.11354517844502  |
| H | 3.80142036673928 | 14.56444341642361 | 2.98030871831016  |
| H | 2.15136734253296 | 10.61089731611735 | 3.37682147888336  |
| H | 1.93304331358551 | 12.96465395597461 | 2.60736456389982  |
| C | 6.81735418068888 | 12.14781237612191 | 6.81079089444838  |
| C | 7.87265913419368 | 11.77171349336879 | 7.65691229107163  |
| C | 5.92640578298983 | 13.14571289238156 | 7.21957088627509  |
| C | 8.01158388830091 | 12.36383306787615 | 8.91025496556369  |
| H | 8.58247272749277 | 11.01138511532524 | 7.33758213282858  |
| C | 6.08254556759123 | 13.75049869490575 | 8.46734330761427  |
| H | 5.10473274957090 | 13.44510913539192 | 6.57618988691521  |
| C | 7.11819724956728 | 13.35799446957210 | 9.31660968496525  |
| H | 8.82342830611949 | 12.05803819969519 | 9.56397055042225  |
| H | 5.38666326148243 | 14.52494999704300 | 8.77732191779297  |
| H | 7.23230455877359 | 13.82802141162716 | 10.28906354608478 |

### 5.18. Fe(CO)<sub>4</sub> Bis(NHC) complex Me-9a

$E = -4965.19975317778$

$E_{ZPE} = 0.44826923$

$E_T = 0.04625442$

$E_S = -0.12115881$

|   |                  |                  |                  |
|---|------------------|------------------|------------------|
| P | 7.34560728442715 | 5.65465135099572 | 5.81560166717885 |
| P | 5.08361814558475 | 6.67822121757706 | 8.05422476313553 |
| N | 7.20113576515107 | 8.50082018345176 | 5.24201230567106 |
| N | 5.77758292347627 | 9.16923141998580 | 6.73182428769756 |
| N | 3.69443429465251 | 4.46158406921318 | 6.79106648730768 |
| N | 5.18393280316913 | 3.76394344915441 | 5.38058757212252 |
| C | 6.75554733611431 | 7.36857770614993 | 5.90446134772642 |
| C | 6.60107601241005 | 9.61919122343894 | 5.74280659462025 |
| C | 5.85833502105114 | 7.78854894227753 | 6.84703755769642 |
| C | 4.76566836512495 | 5.33538137890534 | 6.87670361507976 |
| C | 3.94102100801509 | 3.48443454482255 | 5.86987695708352 |
| C | 5.70699617747231 | 4.89688729514820 | 5.98811618745610 |
| C | 8.18346125569563 | 8.50232813057080 | 4.15572054140708 |



|    |                   |                   |                   |
|----|-------------------|-------------------|-------------------|
| C  | 4.91736368723660  | 10.02945226194968 | 7.54796192270238  |
| C  | 2.47740145319326  | 4.55884153069796  | 7.59846570030617  |
| C  | 5.86791719018372  | 2.97682854092615  | 4.35216437606266  |
| C  | 7.81280694807725  | 5.58920059471504  | 7.66240583193064  |
| C  | 6.70039191210406  | 5.89860572747103  | 8.70059165079412  |
| C  | 9.04094963860418  | 6.49230478167298  | 7.89813441139140  |
| C  | 10.24664609876450 | 6.18376399773400  | 7.00718596586822  |
| C  | 6.35666297475002  | 4.64327559273678  | 9.52705617297288  |
| C  | 5.38213701997236  | 4.88390846895254  | 10.68267887881079 |
| H  | 7.76830800325590  | 9.02110689935380  | 3.29149703969742  |
| H  | 8.40260050378415  | 7.46429673723182  | 3.90199444117380  |
| H  | 9.09599502929461  | 9.00508628516165  | 4.48090621153999  |
| H  | 4.43864431576102  | 9.40428397257134  | 8.30278393496077  |
| H  | 4.15910952945191  | 10.49974081607878 | 6.91961394006220  |
| H  | 5.52352770451862  | 10.79888912128517 | 8.02663226853478  |
| H  | 2.35119019324489  | 5.59884814880992  | 7.90237356682782  |
| H  | 2.56272240120301  | 3.92431403764030  | 8.48411968751251  |
| H  | 1.63328292616810  | 4.23097202003191  | 6.99353294877870  |
| H  | 5.28675551888093  | 2.98457383103124  | 3.42902960130752  |
| H  | 5.99072618669931  | 1.95002980712202  | 4.69879165510109  |
| H  | 6.84370980600577  | 3.43235261884844  | 4.17785064766354  |
| H  | 8.11500543524364  | 4.54189207963089  | 7.79487218188916  |
| H  | 7.08147322531796  | 6.67316354428576  | 9.37951074236550  |
| H  | 8.73712541688931  | 7.53986416714971  | 7.77326179963409  |
| H  | 9.32768299266431  | 6.37794982627706  | 8.95136115679300  |
| H  | 11.10269799381618 | 6.80124083342485  | 7.29830827070098  |
| H  | 10.03395721633737 | 6.38491564291760  | 5.95132559969467  |
| H  | 10.53923968026118 | 5.13105069358574  | 7.09454159555992  |
| H  | 5.96101995737998  | 3.87151497959932  | 8.85368255305227  |
| H  | 7.30101838769000  | 4.24998724556207  | 9.92470573087036  |
| H  | 5.25797605778108  | 3.96980883145405  | 11.27255627436777 |
| H  | 4.39210017026713  | 5.18734289180090  | 10.32467459636931 |
| H  | 5.75209223666452  | 5.67205292988698  | 11.34864921251812 |
| Fe | 6.87495232398136  | 11.49657398645484 | 5.15699204364232  |
| Fe | 2.75918141834698  | 1.96608093649002  | 5.37008473115824  |
| C  | 8.25687700642436  | 11.42843483082000 | 6.28952213816422  |
| C  | 6.09692023234541  | 12.84491385591867 | 6.01031570116956  |
| C  | 7.90371020347506  | 11.88923822321421 | 3.76452451065769  |
| C  | 5.44026810310339  | 11.17439611701609 | 4.13884309857647  |
| C  | 3.30743006909298  | 1.29352652914000  | 6.93413628289202  |
| C  | 1.04671123763961  | 1.83374468069617  | 5.81937409379988  |
| C  | 3.43094937047717  | 0.62989640030621  | 4.41249036176928  |
| C  | 2.39077738781538  | 2.98056871103962  | 3.94394993817784  |
| O  | 9.13982093393705  | 11.32953602217293 | 7.03451938668509  |
| O  | 8.57401983237822  | 12.17985024408312 | 2.85718122438873  |
| O  | 5.59833392902804  | 13.75154434910679 | 6.54548067564256  |
| O  | 4.50902692604824  | 10.91544178534822 | 3.49907320182354  |
| O  | 3.69195607199029  | 0.90287315152325  | 7.95565458277766  |
| O  | -0.07667269059986 | 1.71244636221899  | 6.10249833407649  |
| O  | 3.82671343657044  | -0.26477464917723 | 3.78072811346072  |
| O  | 2.18187000413390  | 3.67424809433839  | 3.03927112913940  |

### 5.19. Fe(CO)<sub>4</sub>-1,4-diphosphinine bis(NHC) complex Me-12

$E = -4728.90574667237$

$E_{ZPE} = 0.28163534$

$E_T = 0.03773719$

$E_S = -0.10438937$

|    |                    |                    |                   |
|----|--------------------|--------------------|-------------------|
| C  | -6.66963352485028  | -6.72633410075835  | -0.46539540995532 |
| C  | -6.97950768907129  | -5.50397224014887  | -1.09867679198574 |
| C  | -4.55665206140921  | -4.62782420806539  | -0.59614913255104 |
| C  | -4.24674510378165  | -5.85024065771565  | 0.03700858119202  |
| P  | -6.01481701131244  | -4.07658675117638  | -1.38274741192225 |
| P  | -5.21144065096057  | -7.27760227877434  | 0.32114604057687  |
| N  | -7.82177882672513  | -7.50248790374792  | -0.55881322666344 |
| N  | -8.30257152746000  | -5.62062394047003  | -1.51646994083548 |
| N  | -3.40456280918360  | -3.85162171596582  | -0.50259873207211 |
| N  | -2.92368801379622  | -5.73357269033344  | 0.45483081982206  |
| C  | -9.00564257568039  | -4.54083390675204  | -2.20430386447985 |
| H  | -8.83613396952915  | -3.60625457222162  | -1.66263821027576 |
| H  | -8.63423076630855  | -4.44478211908353  | -3.22838472797346 |
| H  | -10.06692501306760 | -4.78136501216762  | -2.21036215788931 |
| C  | -7.89386117935680  | -8.86417025160256  | -0.03471340054242 |
| H  | -7.01685757816436  | -9.42190331370238  | -0.37476921621940 |
| H  | -7.91561121824677  | -8.84366653085181  | 1.05848965033948  |
| H  | -8.80096664293982  | -9.32523774833133  | -0.42050395908144 |
| C  | -2.22058299916118  | -6.81344347992326  | 1.14249757769659  |
| H  | -2.38971147267215  | -7.74787705311022  | 0.60045729223813  |
| H  | -1.15935910150805  | -6.57267643792480  | 1.14896848250286  |
| H  | -2.59229885658066  | -6.90994265480905  | 2.16642752877629  |
| C  | -3.33254165773970  | -2.48983857348534  | -1.02644801223344 |
| H  | -2.42544357799778  | -2.02882129117288  | -0.64057379875752 |
| H  | -3.31079485298665  | -2.51012979541518  | -2.11965579941021 |
| H  | -4.20957278293476  | -1.93221595248855  | -0.68628105053238 |
| C  | -2.39451498303471  | -4.51535625281877  | 0.13460687919991  |
| C  | -8.83179605880963  | -6.83877353478290  | -1.19608341482148 |
| Fe | -10.66349603958477 | -7.49639052017284  | -1.57191915036646 |
| Fe | -0.56289680237507  | -3.85768493466998  | 0.51053462242405  |
| C  | -12.05386247139297 | -6.40435543799346  | -1.77301420418945 |
| C  | -10.85450436585563 | -7.52404399857742  | 0.21037857617270  |
| C  | -11.04296972543216 | -9.22733061672699  | -1.73281953224321 |
| C  | -10.19253579726015 | -7.36583051132970  | -3.29684160044140 |
| C  | -0.18307501152209  | -2.12685981472689  | 0.67177818597995  |
| C  | -1.03391072303407  | -3.98835992254393  | 2.23544688313897  |
| C  | -0.37181981771488  | -3.82954479468329  | -1.27175788276691 |
| C  | 0.82742235030776   | -4.94983412336204  | 0.71145127536650  |
| O  | -10.94618517168379 | -7.52594631356467  | 1.36363864435107  |
| O  | -11.34347182642686 | -10.34570488474409 | -1.83876635272006 |
| O  | -9.85498574128952  | -7.27456517075751  | -4.39960998492224 |
| O  | -12.99190746525684 | -5.73293840708420  | -1.91977669876070 |
| O  | -1.37158037602727  | -4.07963889086633  | 3.33817731060604  |
| O  | 0.11771579351805   | -1.00858020238702  | 0.77792900866027  |
| O  | 1.76562831657829   | -5.62104784933789  | 0.85812177171506  |

O -0.28012262027799 -3.82738863867079 -2.42501546614619

## 5.20. Transition state Me-9a-TS

$E = -4965.1590436321$

$E_{ZPE} = 0.44596688$

$E_T = 0.04600367$

$E_S = -0.1198402$

imf =  $-183.34 \text{ cm}^{-1}$

|   |                   |                   |                   |
|---|-------------------|-------------------|-------------------|
| C | -0.47191559293774 | -1.61395382464748 | -0.05928862296270 |
| C | -1.05457416567720 | -0.83335460460962 | -1.04658455012946 |
| C | 1.06353560745226  | 0.75934364816023  | -1.04098932144105 |
| C | 1.68942870597473  | -0.08577246722572 | -0.13672735489912 |
| P | -0.66338822788426 | 0.85635602320821  | -1.41649060788569 |
| P | 0.88602470571957  | -1.18953135547372 | 0.99509158245337  |
| N | -1.27898389158562 | -2.74160006464247 | 0.07413744057832  |
| N | -2.18075113815007 | -1.53170251849034 | -1.47817382178197 |
| N | 2.03693962607853  | 1.65814984754530  | -1.47284665470399 |
| N | 3.01970061216275  | 0.32595611120104  | -0.07780017634653 |
| C | -3.06402262951767 | -1.08695406747083 | -2.55852320748379 |
| H | -4.03392715431104 | -0.78816156787847 | -2.15755192087089 |
| H | -2.59150087160544 | -0.23424507157436 | -3.04961282571834 |
| H | -3.19690173336410 | -1.90170658652560 | -3.26986834203319 |
| C | -1.00574486954789 | -3.81584881109624 | 1.02638650625144  |
| H | -0.92617202446982 | -3.39713964022654 | 2.03254018440809  |
| H | -1.83594851297720 | -4.51875841356411 | 0.97942473885663  |
| H | -0.07007130511990 | -4.31467565910915 | 0.76013135715293  |
| C | 4.05712211416253  | -0.35046977719044 | 0.70394854691559  |
| H | 3.63386750547845  | -1.28043309342945 | 1.08824801554802  |
| H | 4.90774783126625  | -0.56678992668325 | 0.05765648804988  |
| H | 4.37968119929973  | 0.27599983586844  | 1.53714350820629  |
| C | 1.77075370389315  | 2.73218926168771  | -2.42736254761624 |
| H | 1.56256458118109  | 2.30910290748336  | -3.41372003121868 |
| H | 0.90943139413441  | 3.31209641302670  | -2.08714217049201 |
| H | 2.65452076833204  | 3.36711061900403  | -2.46746432265244 |
| C | 3.24521365271601  | 1.38933152130983  | -0.90345810695006 |
| C | -2.31959145346975 | -2.71012125028370 | -0.80429369676974 |
| H | -0.68351518471660 | 0.15480695220805  | 2.63888431900534  |
| C | -0.30576525434357 | 0.84859523795045  | 1.88723835414274  |
| C | -1.25638626357042 | 1.35545182548587  | 0.98630092255735  |
| C | 0.87396421208844  | 1.70479378299629  | 2.29437968440259  |
| H | -1.11559154050313 | 2.39262058245496  | 0.68072684230657  |
| C | -2.68413812453566 | 0.85600291414235  | 1.03515056602720  |
| H | 0.47086974200539  | 2.63568675485014  | 2.72015503699629  |
| H | 1.43202398286450  | 2.01222020008812  | 1.40160008378602  |
| H | -3.05419931547568 | 1.02035563662716  | 2.05794058030190  |
| H | -2.70050262101292 | -0.23125514177619 | 0.89322845924446  |
| C | 1.80480039558544  | 1.06244770143792  | 3.32244269876067  |
| H | 2.60663296761347  | 1.75222074759329  | 3.60227182489674  |
| H | 1.25068200312728  | 0.79442073153987  | 4.22897662799501  |
| H | 2.26605810326649  | 0.14626259715313  | 2.93870168324077  |

|    |                   |                   |                   |
|----|-------------------|-------------------|-------------------|
| C  | -3.63300362022886 | 1.54405900618044  | 0.05399567865868  |
| H  | -4.64857486052575 | 1.14982229171384  | 0.15645385289039  |
| H  | -3.66353127691522 | 2.62354647097476  | 0.23928814493930  |
| H  | -3.31696364467087 | 1.39931818236785  | -0.98475192433217 |
| Fe | 4.97638785697983  | 2.32270274541666  | -1.18888264952085 |
| Fe | -3.74705066403866 | -4.06818651819081 | -1.07376420550909 |
| C  | 4.70435028631856  | 2.92882509089554  | 0.47209513097708  |
| C  | 5.16029209212920  | 3.97020683376888  | -1.82730569813610 |
| C  | 6.49254750037561  | 1.49190363117855  | -0.77804871931283 |
| C  | 4.88485333878362  | 1.60911954576284  | -2.82841805392210 |
| C  | -4.76311729502252 | -2.88070086149165 | -0.20252537477926 |
| C  | -4.14089987201799 | -5.36717129500034 | 0.07221209093222  |
| C  | -2.43682625457666 | -5.01584549953581 | -1.84198500761152 |
| C  | -4.74226694876826 | -4.02709471107527 | -2.54456853034507 |
| O  | 4.48621595577775  | 3.30416131682151  | 1.54634503302561  |
| O  | 5.32324901055852  | 5.04405923944798  | -2.24672345664350 |
| O  | 7.51245048691027  | 0.99592025072164  | -0.51645372837654 |
| O  | 4.78341333929587  | 1.12892166269378  | -3.87744907714767 |
| O  | -5.38027163682314 | -2.08240585435004 | 0.36723390408613  |
| O  | -4.42976010451967 | -6.23609646100946 | 0.79153072917788  |
| O  | -1.55742270556251 | -5.59087163159032 | -2.32952159466427 |
| O  | -5.42554252308600 | -4.03704144682524 | -3.48696431451444 |

## 5.21. Benzene

$$E = -232.664908030522$$

$$E_{ZPE} = 0.09878993$$

$$E_T = 0.00446923$$

$$E_S = -0.03226501$$

|   |                   |                   |                   |
|---|-------------------|-------------------|-------------------|
| C | -1.95157515664963 | -1.94181934194898 | 0.00123964360573  |
| C | -0.55451034892333 | -1.94187599422772 | 0.00167952666477  |
| C | 0.14406955309208  | -0.73212590832029 | 0.00113048235510  |
| C | -0.55442426849691 | 0.47771364661745  | 0.00014360049289  |
| C | -1.95145687573065 | 0.47777029081972  | -0.00029632909168 |
| C | -2.65005291912501 | -0.73200663881849 | 0.00025269425661  |
| H | -2.49494331228158 | -2.88301125882164 | 0.00166329347121  |
| H | -0.01124572085226 | -2.88312819979092 | 0.00246102019623  |
| H | 1.23086778614158  | -0.73211910991074 | 0.00148510813606  |
| H | -0.01095887139054 | 1.41884936534224  | -0.00027981981910 |
| H | -2.49481857563281 | 1.41896658235759  | -0.00107745735864 |
| H | -3.73685129015094 | -0.73191343329822 | -0.00010176290916 |

## 5.22. FMOs of Me-2a and [Me-4a]<sup>2+</sup>

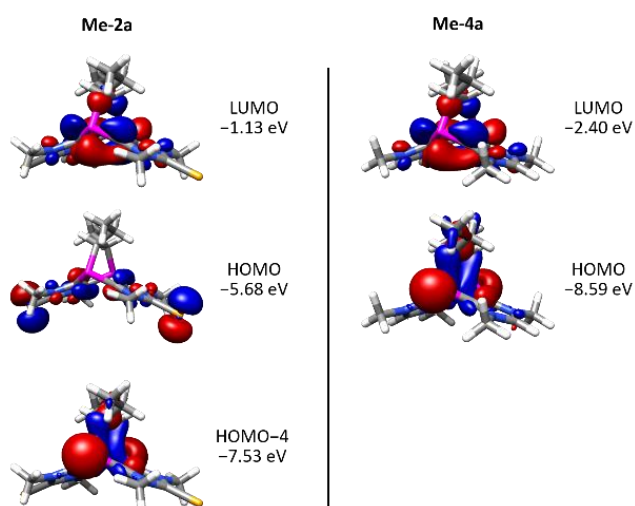

**Figure S48** Calculated FMOs of **Me-2a** and **[Me-4a]<sup>2+</sup>** including P-centred LUMOs and P lone pair with large s-character in the HOMO-4 or HOMO, respectively.

## 5.23. LUMO to HOMO-5 of Me-5a

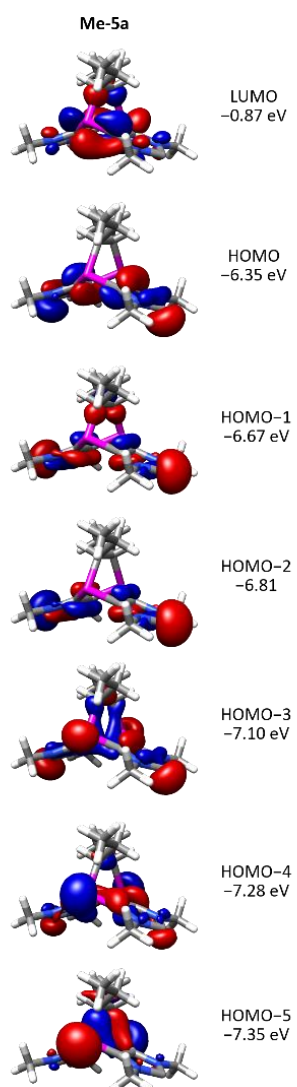

Figure S49 Calculated carbene and/or P-centred FMOs of Me-5a.

#### 5.24. FMOs of Me-9a

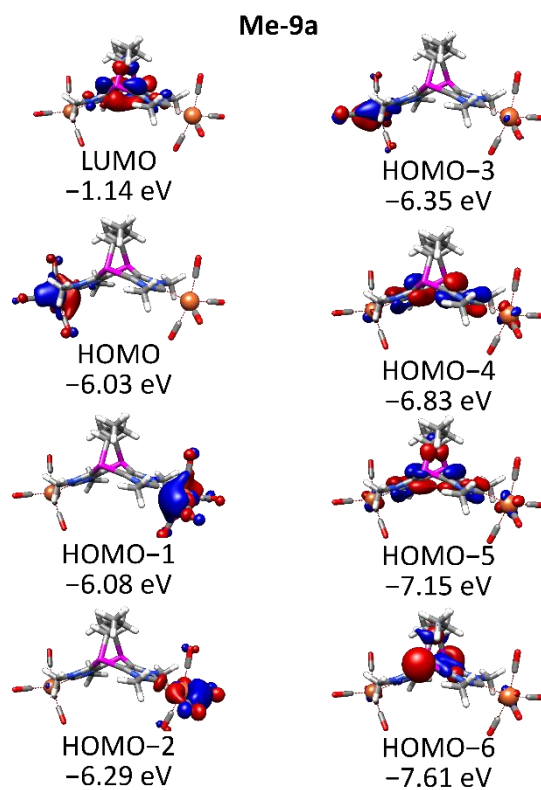

Figure S50 Calculated FMOs of Me-9a.

#### 5.25. HOMO and LUMO of Me-10

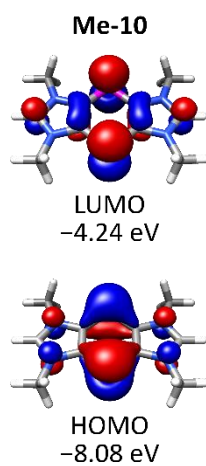

Figure S51 Calculated HOMO and LUMO of Me-10.

## 5.26. FMOs of Me-11

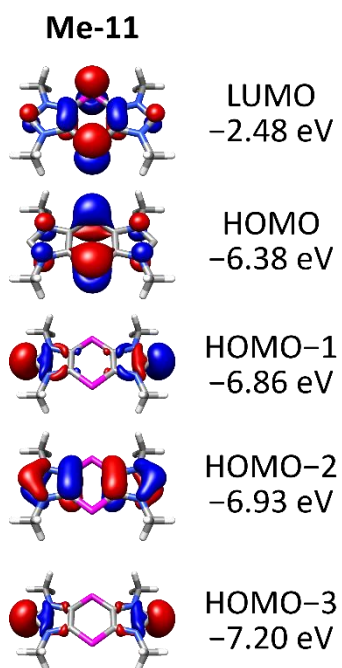

**Figure S52** Calculated FMOs of **Me-11**

## 6. References

- 1 G. R. Fulmer, A. J. M. Miller, N. H. Sherden, H. E. Gottlieb, A. Nudelman, B. M. Stoltz, J. E. Bercaw and K. I. Goldberg, *Organometallics*, 2010, **29**, 2176.
- 2 R. H. Blessing, *Acta Cryst. A*, 1995, **51 ( Pt 1)**, 33.
- 3 G. M. Sheldrick, SHELXS97 and SHELXL97, University of Göttingen, 1997.
- 4 O. V. Dolomanov, L. J. Bourhis, R. J. Gildea, J. A. K. Howard and H. Puschmann, *J. Appl. Cryst.*, 2009, **42**, 339.
- 5 a) F. Neese, *Wiley Interdiscip. Rev. Comput. Mol. Sci.*, 2012, **2**, 73; b) F. Neese, *Wiley Interdiscip. Rev. Comput. Mol. Sci.*, 2022, **12**;
- 6 F. Neese, F. Wennmohs, U. Becker and C. Riplinger, *J. Chem. Phys.*, 2020, **152**, 224108.
- 7 J. Tao, J. P. Perdew, V. N. Staroverov and G. E. Scuseria, *Phys. Rev. Lett.*, 2003, **91**, 146401.
- 8 a) E. Caldeweyher, S. Ehlert, A. Hansen, H. Neugebauer, S. Spicher, C. Bannwarth and S. Grimme, *J. Chem. Phys.*, 2019, **150**, 154122; b) E. Caldeweyher, J.-M. Mewes, S. Ehlert and S. Grimme, *Phys. Chem. Chem. Phys.*, 2020, **22**, 8499;
- 9 F. Weigend, M. Häser, H. Patzelt and R. Ahlrichs, *Chem. Phys. Lett.*, 1998, **294**, 143.
- 10 F. Weigend and R. Ahlrichs, *Phys. Chem. Chem. Phys.*, 2005, **7**, 3297.
- 11 F. Weigend, F. Furche and R. Ahlrichs, *J. Chem. Phys.*, 2003, **119**, 12753.
- 12 D. Rappoport and F. Furche, *J. Chem. Phys.*, 2010, **133**, 134105.
- 13 V. Barone and M. Cossi, *J. Phys. Chem. A*, 1998, **102**, 1995.
- 14 ORCA 5.0.4 Manual, <https://orcaforum.kofo.mpg.de>, (accessed 8 November 2023).
- 15 a) V. Ásgeirsson, B. O. Birgisson, R. Bjornsson, U. Becker, F. Neese, C. Riplinger and H. Jónsson, *J. Chem. Theory Comput.*, 2021, **17**, 4929; b) B. J. Berne, G. Ciccotti and D. F. Coker, eds., *Classical and quantum dynamics in condensed phase simulations. Proceedings of the International School of Physics "Computer Simulation of Rare Events and the Dynamics of Classical and Quantum Condensed-Phase Systems"* ; Euroconference on "Technical Advances in Partical-Based Computational Material Sciences", Lerici, Villa Marigola, 7 July - 18 July 1997, WORLD SCIENTIFIC, Singapore, 1998; c) G. Henkelman and H. Jónsson, *J. Chem. Phys.*, 2000, **113**, 9978; d) G. Mills, H. Jónsson and G. K. Schenter, *Surf. Sci.*, 1995, **324**, 305;
- 16 Y. Zhao and D. G. Truhlar, *J. Phys. Chem. A*, 2005, **109**, 5656.
- 17 a) F. Weigend, *Phys. Chem. Chem. Phys.*, 2006, **8**, 1057; b) K. Eichkorn, F. Weigend, O. Treutler and R. Ahlrichs, *Theor. Chem. Acc.*, 1997, **97**, 119;
- 18 E. F. Pettersen, T. D. Goddard, C. C. Huang, G. S. Couch, D. M. Greenblatt, E. C. Meng and T. E. Ferrin, *J. Comput. Chem.*, 2004, **25**, 1605.
